# Kinematics of wings from *Caudipteryx* to modern birds

Yaser Saffar Talori<sup>1</sup>, Jing-Shan Zhao<sup>1\*</sup>, Jingmai Kathleen O'Connor<sup>2</sup>

<sup>1</sup>Department of Mechanical Engineering, Tsinghua University, Beijing 100084, P. R. China.

<sup>2</sup>Key Laboratory of Vertebrate Evolution and Human Origins, Institute of Vertebrate Paleontology and Paleoanthropology, Chinese Academy of Sciences, Beijing, 100044, P. R. China.

\*Correspondence and requests for materials should be addressed to Jing-Shan Zhao ([jingshanzhao@mail.tsinghua.edu.cn](mailto:jingshanzhao@mail.tsinghua.edu.cn)).

## Abstract

This study seeks to better quantify the parameters that drove the evolution of flight from non-volant winged dinosaurs to modern birds. In order to explore this issue, we used fossil data to model the feathered forelimb of *Caudipteryx*, the most basal non-volant maniraptoran dinosaur with elongate pennaceous feathers that could be described as forming proto-wings. In order to quantify the limiting flight factors, we created three hypothetical wing profiles for *Caudipteryx* representing incrementally larger wingspans, which we compared to the actual wing morphology as what revealed through fossils. These four models were analyzed under varying air speed, wing beat amplitude, and wing beat frequency to determine lift, thrust potential and metabolic requirements. We tested these models using theoretical equations in order to mathematically describe the evolutionary changes observed during the evolution of modern birds from a winged terrestrial theropod like *Caudipteryx*. *Caudipteryx* could not fly, but this research indicates that with a large enough wing span *Caudipteryx*-like animal could have flown, the morphology of the shoulder girdle would not actually accommodate the necessary flapping angle and metabolic demands would be much too high to be functional. The results of these analyses mathematically confirm that during the evolution of energetically efficient powered flight in derived maniraptorans, body weight had to decrease and wing area/wing profile needed to increase together with the flapping angle and surface area for the attachment of the flight muscles. This study quantifies the morphological changes that we observe in the pennaraptoran fossil record in the overall decrease in body size in paravians, the increased wing surface area in *Archaeopteryx* relative to *Caudipteryx*, and changes observed in the morphology of the thoracic girdle, namely the orientation of the glenoid and the enlargement of the sternum.

## Introduction

The origin of birds has still been a theme of considerable scientific debate [1–7]. Currently it is nearly universally accepted that Aves belongs to the derived clade of theropod dinosaurs, the Maniraptora [8,9]. The oviraptorosaur *Caudipteryx* is a member of this clade and the basal-most maniraptoran with pennaceous feathers [10–12]. The longest of these feathers are located distally on the forelimb, strongly resembling the ‘wings’ of birds. However, the relative length of these feathers compared to those in volant birds and the brevity of the forelimb itself compared to the size of the body and length of the hindlimbs all point to a clearly terrestrial animal [13–15]. It is

42 understood that winged forelimbs must have evolved first for some other purpose and were later  
43 exapted for flight. Hypotheses regarding their original function range from ornamentation,  
44 temperature regulation, or locomotion [16–21]. The feathers on the forelimbs and tail in  
45 *Caudipteryx* are straight with symmetrical vanes similar to the wing feathers in flightless birds.  
46 It's certainly clear that *Caudipteryx* couldn't fly [22–24]. However, as a fairly fast cursorial animal,  
47 the presence of feathered distal forelimbs must have had some effect on the locomotion of  
48 *Caudipteryx*. The aerodynamic effect of the basal-most known forelimbs with pennaceous feathers  
49 has the potential to shed light on the evolution of flying wings in Paraves (see Supplementary  
50 Materials for more basic information about the flight kinematics of bird's wings).

51 We mathematically modeled *Caudipteryx* with three hypothetical wing sizes (morphotypes  
52 **B**, **C**, and **D**) across a range of input values for flapping angle, wing beat frequency and velocity  
53 (the hypothetical wingspans are based on such modern birds listed in S1 Table and the wing  
54 profiles are inspired by an eagle [25]). We explore what values would be necessary to allow  
55 *Caudipteryx* to fly. This analysis quantifies the physical constraints that exclude the cursorial  
56 *Caudipteryx* from engaging in volant behavior despite the presence of feathered forelimbs and hint  
57 at the evolutionary changes necessary to evolve flight in the maniraptoran lineage from a cursorial  
58 animal with small wings like *Caudipteryx* to the neornithine condition, which is supported through  
59 observations from the fossil record of pennaraptorans.

60  
61 **Fig 1.** Type A is an actual *Caudipteryx*'s model and the wings in Types B, C and D are assumed  
62 in different sizes changing in linear form.

## 64 **Materials and methods**

65 In order to achieve a reasonable accuracy in analyses, each wing type (Fig 1) is divided into ten  
66 elements, each modeled using unsteady aerodynamics in order to capture lift, thrust/drag and  
67 required power (Fig 2). Type-A is based on fossil data and represents a realistic estimate of wing  
68 length ( $l$ ) which we measure to be 0.24 meters. Types-B, C and D are hypothetical models with  
69 increasing wing lengths of 0.419, 0.6459 and 0.812 meters, respectively, and for the sake of  
70 simplicity, we approximately calculate the areas of the wings with the equivalent rectangular ones.

71 Wings size in terms of area  $S$  ( $m^2$ ), mean chord length  $C$  ( $m$ ), aspect ratio ( $\lambda$ ), flapping  
72 angle ( $\Gamma_0$ ) and other wing angles describe the state of the wing (Fig 1 and Table 1). The element's

73 motion includes a plunging velocity  $\dot{h}$  and pitch angle (twist angle)  $\theta$ . We assumed that the  
74 wing's aspect ratio is large enough to pass flow through each element in the mean stream direction.  
75 Hence, the normal force  $dN$  of the element's total attached flow, is equal to the normal force  
76  $dN_a$  of element's circular plus apparent mass effect, as an additional normal force contribution  
77 which acts at the mid chord. Delaurier and Larijani have given the formulas below based on  
78 mathematics, tests and experiments [26–32].

79

80 **Table 1.** Specifications of Types-A, B, C and D

|                        | Type-A | Type-B | Type-C | Type-D  |
|------------------------|--------|--------|--------|---------|
| $l(m)$                 | 0.24   | 0.419  | 0.6459 | 0.812   |
| $S(m^2)$               | 0.0179 | 0.0597 | 0.1778 | 0.28751 |
| $C(m)$                 | 0.0907 | 0.1439 | 0.2766 | 0.3575  |
| $\lambda$              | 3.2    | 2.94   | 2.35   | 2.3     |
| $\bar{\theta}_a$ (deg) | 0      | 0      | 0      | 0       |
| $\bar{\theta}_w$ (deg) | 15     | 20     | 20     | 20      |
| $\Gamma_0$ (deg)       | 22.5   | 60     | 60     | 60      |
| $\alpha_0$ (deg)       | 30     | 10     | 10     | 10      |
| $\beta_0$ (deg)        | 180    | 10     | 10     | 10      |
| $\eta_s$               | 0.9    | 0.9    | 0.9    | 0.9     |

81

82 **Fig 2.** Kinematics model of flapping flight for each element of the wing of *Caudipteryx*.

83

84 
$$dN = dN_c + dN_a \quad (1)$$

85 The normal force of the element's circular and the apparent mass effect are defined as below

86 
$$dN_c = 0.5\rho UVC_n(y)cdy \quad (2)$$

87 
$$dN_a = 0.25\rho\pi c^2(U\dot{\alpha} - 0.25c\ddot{\theta})dy \quad (3)$$

88 where  $\rho$  is the density of the airflow,  $V$  is the flow's relative velocity at the  $\frac{1}{4}$  chord,

89  $C_n(y) = 2\pi(\alpha' + \alpha_0 + \bar{\theta}_a + \bar{\theta}_w)$ ,  $\bar{\theta}_a$  is the angle between flapping axis and mean stream velocity

90 ( $U$ ),  $\bar{\theta}_w$  is the mean angle between chord and flapping axis,  $\alpha_0$  is the angle of the zero lift line

91 (the value is fixed for airfoil in each situation along the wing),  $\alpha'$  is the flow's relative angle of

92 attack at the  $\frac{3}{4}$  chord (Fig 2), it's given by

93 
$$\alpha' = \frac{\lambda}{(2+\lambda)} \left[ \left(1 - \frac{c_1 k^2}{k^2 + c_2^2}\right) \alpha - \frac{c}{2U} \frac{(c_1 c_2)}{(k^2 + c_2^2)} \dot{\alpha} \right] - \frac{2(\alpha_0 + \bar{\theta})}{2+\lambda} \quad (4)$$

94 where  $\lambda$  is the aspect ratio of the wing of *Caudipteryx*,  $c$  is the wing element chord length,

95  $k = c\omega/2U$  which is the reduced frequency ( $\omega$  is in radians and  $\omega = 2\pi f$ , and  $f$  is in hertz).

96 Equation (4) is simplified by formulation of the modified Theodorsen function which was  
 97 originally presented by Jones [33],  $c_1 = 0.5\lambda / (2.32 + \lambda)$  and  $c_2 = 0.181 + (0.772 / \lambda)$ .  $\alpha$  and  
 98  $\dot{\alpha}$  are given by

$$99 \quad \alpha = \frac{[\dot{h} \cos(\theta - \bar{\theta}_a) + 0.75c\dot{\theta}]}{U} + (\theta - \bar{\theta}) \quad (5)$$

$$100 \quad \dot{\alpha} = \frac{[\ddot{h} \cos(\theta - \bar{\theta}_a) - \dot{h}\dot{\theta} \sin(\theta - \bar{\theta}_a) + 0.75c\ddot{\theta}]}{U} + \dot{\theta} \quad (6)$$

101 where  $\alpha$  is the relative angle of attack at the  $3/4$  chord. The pitch angle  $\theta$  is  $\theta = \bar{\theta}_a + \bar{\theta}_w + \delta\theta$   
 102 where  $\delta\theta$  is the dynamically varying pitch angle (Fig 2). The  $\theta(y, t)$  is a function of  $y$  and  
 103  $\omega$ . Therefore,  $\delta\theta(y, t) = -\beta_0 y \sin(\omega t)$  which prescribes the twist of wing of *Caudipteryx* where  
 104  $\beta_0$  is a constant representing the twist angle per unit distance along the wing span ( $^\circ/\text{m}$ ). Hence,  
 105 the first and second derivatives of  $\theta(y, t)$  with respect to time are written as

$$106 \quad \dot{\theta}(y, t) = -\beta_0 y \omega \cos(\omega t) \quad (7)$$

$$107 \quad \ddot{\theta}(y, t) = \beta_0 y \omega^2 \sin(\omega t) \quad (8)$$

108 The plunging displacement of each element is  $h(t) = (\Gamma_0 y) \times \cos(\omega t)$  (the imposed  
 109 motion), where  $\Gamma_0$  is the maximum flapping amplitude and  $y$  is the distance between flapping  
 110 axis (wing base) and center of a wing segment. Therefore, the plunging velocity  $\dot{h}(t)$  and  
 111 acceleration  $\ddot{h}(t)$  at the leading edge are given as

$$112 \quad \dot{h}(t) = -(\Gamma_0 y) \omega \times \sin(\omega t) \quad (9)$$

$$113 \quad \ddot{h}(t) = -(\Gamma_0 y) \omega^2 \times \cos(\omega t) \quad (10)$$

114 Pitch angle (twist angle) changes during flapping and these variations are proportional to  
 115 flapping angle in a cycle (S2 Fig). The wing motion of *Caudipteryx* relative to  $U$  is included in the  
 116 flow velocity  $V$  given in equation (2) and also term of  $\alpha'$  is taken into account,  $V$  is

$$117 \quad V = \left\{ \left[ U \cos \theta - \dot{h} \sin(\theta - \bar{\theta}_a) \right]^2 + \left[ U(\alpha' + \bar{\theta}) - 0.5c\dot{\theta} \right]^2 \right\}^{\frac{1}{2}} \quad (11)$$

118 The element's circulation distribution generates forces along the chord axis direction (Fig  
 119 2), hence the chordwise force due to the camber ( $dD_{camber}$ ) and chordwise friction drag due to  
 120 viscosity are given by

$$121 \quad \begin{cases} dD_{camber} = -\pi\alpha_0(\alpha' + \bar{\theta})\rho UVc dy \\ dD_{friction} = 0.5(C_d)_f \rho V_x^2 c dy \end{cases} \quad (12)$$

122 where  $(C_d)_f = 0.89 / (\log(\text{Re}_{chord}))^{2.58}$  is the friction drag coefficient [34] of the skin that is  
 123 included in Reynolds' number of local chord length and  $V_x = U \cos \theta - \dot{h} \sin(\theta - \bar{\theta}_a)$  is the  
 124 tangential flow speed to the element. For the two dimensional airfoil, Garrick expressed  $dT_s$  for  
 125 the leading edge as below [35,36]

$$126 \quad dT_s = \eta_s \pi (\alpha' + \bar{\theta} - 0.25c\dot{\theta}/U)^2 \rho UVc dy \quad (13)$$

127 where  $\eta_s$  is the efficiency term which presents that in reality because of viscous effects, the  
 128 efficiency of leading edge of most airfoils are less than 100%. Therefore, the total chordwise force  
 129 along the chord axis is expressed with

$$130 \quad dF_x = dT_s - dD_{camber} - dD_{friction} \quad (14)$$

131 Therefore, the equations of element's instantaneous lift and thrust are rewritten as

$$132 \quad dL = dN \cos \theta + dF_x \sin \theta \quad (15)$$

$$133 \quad dT = dF_x \cos \theta - dN \sin \theta \quad (16)$$

134 where  $dL$  and  $dT$  are the instantaneous lift and thrust of the element, respectively. To integrate  
 135 along the wingspan and to get whole wing's instantaneous lift and thrust, for wings, it is given by

$$136 \quad \begin{cases} L(t) = 2 \int_0^l \cos[\Gamma_0 \times \cos(\omega t)] dL \\ T(t) = 2 \int_0^l dT \end{cases} \quad (17)$$

137 where  $l$  is the wing span length. The average of the lift and thrust can be obtained via integrating  
 138 equation (17) over a cycle as  $\varphi = \omega t$ .

$$139 \quad \begin{cases} \bar{L} = \frac{1}{2\pi} \int_0^{2\pi} L(\varphi) d\varphi \\ \bar{T} = \frac{1}{2\pi} \int_0^{2\pi} T(\varphi) d\varphi \end{cases} \quad (18)$$

140 where  $\bar{L}$  and  $\bar{T}$  are the averages of the lift and thrust, individually. To calculate the required  
 141 power against the forces, it is represented for attached flow by

$$142 \quad dP_{input} = dF_x \dot{h} \sin(\theta - \bar{\theta}_a) + dN \left[ \dot{h} \cos(\theta - \bar{\theta}_a) + 0.25c\dot{\theta} \right] + dN_a \left[ 0.25c\dot{\theta} \right] - dM_{ac} \dot{\theta} - dM_a \ddot{\theta} \quad (19)$$

143 where  $dM_{ac}$  is the element's pitching moment about its aerodynamic center and  $dM_a$  is  
 144 composed of apparent chamber and apparent inertia moments are given respectively as follows

$$145 \quad dM_{ac} = 0.5C_{mac} \rho U V c^2 dy \quad (20)$$

$$146 \quad dM_a = - \left[ \frac{1}{16} \rho \pi c^3 \dot{\theta} U + \frac{1}{128} \rho \pi c^4 \ddot{\theta} \right] dy \quad (21)$$

147 where  $C_{mac}$  is the coefficient of airfoil moment about its aerodynamic center. The  
 148 instantaneously required power,  $P_{input}(t)$ , for a whole wing is derived below

$$149 \quad P_{input}(t) = 2 \int_0^l dP_{input} \quad (22)$$

150 Then the average input power in a cycle is found from

$$151 \quad \bar{P}_{input} = \frac{1}{2\pi} \int_0^{2\pi} P_{input}(\varphi) d\varphi \quad (23)$$

152 www.shearwater.nl, Diagram of the bones and muscles in the chest, Diagram Courtesy of Wildbase (Massey University), Denise  
 153 Takahashi, Callaway (2014).

154 **Fig 3.** Illustrations of the avian flight apparatus in *Archaeopteryx* and living birds. A keeled  
 155 sternum indicates increased capacity for flight based on the increased surface area for the  
 156 attachment of the flight muscles. The realistic mode and reconstructed wing type (type-A) is based  
 157 on *Caudipteryx* fossil [24].

158  
 159 The weight of body is computed about 50 N for the holotype of *Caudipteryx dongi*-IVPP  
 160 V12344-Based on equation relating femur length to mass [37], the average of the lengths of the  
 161 left and right femur are both 149 mm. With the formulas above, we compare the lift, thrust and  
 162 power of each model with regards to the changes in wing angles (flapping angle (S4 Table),  $\bar{\theta}_w$   
 163 (S5 Fig) and dynamic twist angle (S6 Fig)), flapping frequency from lower frequency (1 Hertz)  
 164 (S9 Fig and S10 Fig) to higher frequency (8 Hertz) (Fig 4) and velocity while the range of the air  
 165 velocity changes from almost zero (U=0.05 m/s) (Fig 4, S8 Fig and S9 Fig) to higher speed (U=  
 166 10 m/s) (Fig 4 and S9 Fig). In the analyses on type-A, the wing angles are  $\bar{\theta}_a = 15 \text{ deg}$  ,  
 167  $\bar{\theta}_w = 15 \text{ deg}$  ,  $\alpha_0 = 30 \text{ deg}$  ,  $\beta_0 = 180 \text{ deg}$  deg and  $\Gamma_0 = 22.5 \text{ deg}$  and in hypothetical models

168 (types **B**, **C** and **D**), the corresponding parameters are  $\bar{\theta}_a = 15 \text{ deg}$ ,  $\bar{\theta}_w = 20 \text{ deg}$ ,  $\alpha_0 = 1 \text{ deg}$ ,  
169  $\beta_0 = 10 \text{ deg}$  and  $\Gamma_0 = 60 \text{ deg}$ .

170  
171 **Fig 4.** Variation in lift and thrust of *Caudipteryx* with respect to flapping frequency at any velocity.  
172

## 173 Results

174 When  $\bar{\theta}_w$  is 15 deg the realistic *Caudipteryx* (type-**A**) is capable of producing maximum thrust  
175 force but to have only vertical motion (maximum lift force with a small value of thrust),  $\bar{\theta}_w$  must  
176 be increased to 45 deg while  $U$  is 0.05 m/s (velocity is almost zero) (S5 Fig). In other hypothetical  
177 models (types **B**, **C** and **D**) the situation is almost similar to the realistic one (i.e. with the angle of  
178 20 deg for maximum thrust and 45 deg for maximum lift). Hence, lift increases and thrust decreases  
179 as the angle of  $\bar{\theta}_w$  increases. In all models consumed power is proportional to the thrust force (S5  
180 Fig) and the maximum thrust force requires maximum power.

181 The feathers in type-**A** were modeled as softer than those in modern birds (being primitive  
182 and symmetrical), and as the dynamic twist angle  $\beta_0$  expresses the stiffness of feathers along the  
183 wing span, we presumed  $\beta_0 = 180^\circ$  when lift and thrust are at their maximum values. The best  
184 and optimum value of this angle for three hypothetical models (types **B**, **C** and **D**) is 10 deg when  
185 the velocity is almost zero in one cycle ( $f=1\text{Hz}$ ) (S6 Fig). In all models, as the flapping angle (wing  
186 beat amplitude)  $\Gamma_0$  increases, lift, thrust and the required energy also increase simultaneously  
187 (S4 Fig).

188 When birds supinate their wings, drag forces help the birds to brake. Larger wings moving  
189 at higher velocities produce greater braking forces (S7 Fig). Based on our analysis, the wings of  
190 *Caudipteryx* (type-**A**) utilizing both lower and higher wing beat frequencies at any velocity, are  
191 always capable of generating positive lift, but thrust force is only positive when the velocity is near  
192 zero and is negative during movement at any larger velocity (Fig 4). Hence in type-**A**, when  
193 flapping frequency and velocity increase, lift also increases but thrust converts to the drag force  
194 (negative thrust) causing a corresponding increase in metabolic demands (S3 Fig). In all  
195 hypothetical wings (types-**B**, **C** and **D**) lift is positive; an increase in flapping frequency at any  
196 velocity generates an increase in lift (Fig 4 and S9 Fig).

197 Although hypothetical wing type-**B** cannot provide sufficient lift force to overcome gravity  
198 (Fig 4 and S8 Fig), type-**C** is theoretically capable of supporting flight at lower velocity and higher  
199 wing beat frequency (namely  $U=1\sim 2$  m/s and frequency= $6\sim 8$  Hz) but cannot generate large enough  
200 lift at higher velocities (Fig 4 and S9 Fig). The larger wings in type-**D** are capable of sustaining  
201 faster flight (8 m/s) with higher flapping frequency ( $f=4\sim 8$  Hz). Heavier birds flying at higher

202 velocities require greater wing span. The obtained lift and thrust forces from Type-A deduced by  
203 experiments (S11 Fig) support our theoretical calculations (S2 Table).

204

## 205 Discussion

206 Powered flight is the most physically demanding form of locomotion. Thus, during the course of  
207 evolution of flight from non-volant dinosaurs such as *Caudipteryx* to Aves, major skeletal  
208 adaptations needed to evolve in order to allow the necessary range of motion, accommodate the  
209 necessary musculature, and produce these adaptations in a light weight framework. These  
210 adaptations include modification of the glenoid to facilitate greater flapping angles and  
211 enlargement of the sternum to support the increased musculature necessary to generate significant  
212 thrust forces. This had to be paired with the ability to meet the metabolic demands of sustaining  
213 flight (the neornithine digestive system is highly specialized) [38–40]. We can infer these changes  
214 based on observations of the fossil record. However, the aerodynamic limitations that drove these  
215 evolutionary changes have never been explored.

216 In order to explore this idea, we tested the impact of increasing wing size in *Caudipteryx*  
217 within its actual skeletal framework. We considered three hypothetical wing morphologies (types  
218 **B**, **C**, and **D**) that vary in wing span, wing profile, wing chord, and aspect ratio (Fig 1). The goal  
219 in this study is to assess the effects of increasing wing size in a terrestrial form in order to identify  
220 which variables are limiting volant behavior. We focused on flight kinematic parameters during  
221 take off. The flight kinematics formulas utilized here to calculate lift, thrust and power allow us to  
222 compare all states in varying frequencies, velocities and flapping angles while ranging air stream  
223 velocity changes from almost zero to high speeds. This provides a comprehensive understanding  
224 of all important flight parameters.

225 In type **A**, the feathers are assumed to be weaker than those in types **B**, **C** and **D** and the  
226 flapping angle is much lower, which reflects the basal position of these non-aerodynamic feathers  
227 and the morphology of the glenoid. Increasing frequency and flapping angle from  $\pm 22.5$  deg to  
228  $\pm 60$  deg (in types **B**, **C** and **D**) generates higher lift force (see S3 Table and S4 Table in  
229 Supplementary Materials for more information about the values of flapping beats and flapping  
230 angles). However, the theoretical requirements for metabolic power and muscle performance are  
231 unrealistic. This quantifies the observed changes in the scapulocoracoid observed during the  
232 evolution of birds from non-volant dinosaurs. Our analyses express that during low flapping  
233 frequency ( $f=3$  Hz) and when the wind velocity is almost zero in wing types **B** and **C** (near type-  
234 **C**) the lift force generated by the wings is nearly enough to overcome gravity for take off. At low  
235 velocity and with a higher hindlimb frequency, type-**C** is able to meet the lift requirements. In this  
236 type, although the wings would not be able to provide enough force to fly faster, type **C** can supply  
237 the capability of flying at lower speed. The wings in type **D** are larger allowing the model  
238 *Caudipteryx* to fly faster than 8 m/s with higher wing beat frequency. Not surprisingly, the largest  
239 wings (type **D**) generate the greatest lift, thrust forces, and drag force during braking. However, as  
240 flapping frequency increases, so do the required thrust forces and metabolic requirements.

241 The aerodynamic behavior of the realistic *Caudipteryx* model, reconstructed from fossil  
242 material (type **A**), reveals that the wings could generate lift but at any velocity produced more drag  
243 than thrust, and thus probably did not evolve in this taxon for aerodynamic function. The analyses  
244 indicate that for a given lift or thrust force, all hypothetical types of *Caudipteryx* would have to



245 increase wing beat frequency to increase their velocities. It depends on wingspan that produces  
246 capability of flying, those generations of the new birds whose wing's profile is similar to those of  
247 types **B** and **C**, they need to decrease their self-weight during evolution to obtain enough lift and  
248 thrust for flight in accordance with the weight. Heavy modern birds (such as Black-browed  
249 albatross or Wandering albatross-see Table **S1** in Supplementary Materials) shall have large  
250 enough wingspan more than that of type **C** to keep balance between lift force and their body weight.

251 In order to take off to overcome gravity, sustain flapping flight and maintain lift forces to  
252 oppose body-weight, flapping frequency, and flapping angle (as the most significant parameter)  
253 and wing span had to increase. At small flapping angles, like those present in *Caudipteryx* and  
254 other non-volant maniraptorans, the wing beat cannot generate large enough lift and thrust. This  
255 verifies the observed changes in shoulder architecture in the lineage to Aves from a more  
256 ventrolateral (non-volants) or laterally facing (*Archaeopteryx*) glenoid to the dorsolaterally facing  
257 glenoid in birds—clearly the wings of *Caudipteryx* are the smallest among the wings of known  
258 Mesozoic pennaraptorans and the birds, and the wings of volant dromaeosaurid *Microraptor* are  
259 much larger. Heavier flying birds need more lift to become airborne and thus require larger  
260 wingspans with large flapping angles and strong flight muscles.

261 Depending on the wing profile, the flapping angle should be more than 60 degrees (i.e. with  
262 a total range of motion of 120 degrees). To accommodate this range of motion, it required the  
263 dorsal expansion of the glenoid and an increase in wing musculature to manipulate the larger wings  
264 against greater aerodynamic resistance. This would drive up the metabolic cost of flight so high as  
265 to make this form of locomotion inefficient. However, this can be obviated by reducing the cost  
266 of flapping flight with an overall reduction in body weight.

267 Observations from fossils suggest that this was achieved both through a reduction in overall  
268 body size and by the evolution of additional pneumaticity and thinner bone cortices.  
269 Morphological changes of the skeleton such as the reduction of tail, and modification of numerous  
270 biological systems such as the loss of the right ovary and evolution of a highly efficient digestive  
271 system. This ultimately produced a body shape that was well adapted to spindle shaped, generating  
272 less resistance (drag force) during flight (Fig 3) [25,40,41]. Therefore, it is important for efficient  
273 flight to decrease body mass and to increase musculature, wing profile, aspect ratio, flapping angle  
274 in the evolution from non-volant maniraptoran dinosaur to modern birds.

275

## 276 **Acknowledgements**

277 The authors acknowledge the kind suggestions from Prof. Dr. Corwin Sullivan from the  
278 Department of Biological Sciences, University of Alberta, Canada. Prof. Dr. Zhong-He Zhou and  
279 Prof. Dr. Min Wang from the Key Laboratory of Vertebrate Evolution and Human Origins,  
280 Institute of Vertebrate Paleontology and Paleoanthropology, Chinese Academy of Sciences,  
281 Beijing, 100044, P. R. China. This project was supported by the National Natural Science  
282 Foundation of China under grant 51575291, the National Major Science and Technology Project  
283 of China under grant 2015ZX04002101, State Key Laboratory of Tribology, Tsinghua University,  
284 and the 221 program of Tsinghua University.

285

## 286 **Author Contributions**

287 Author contributions: Y. S. deduced formulas and prepared programs, simulations, tables and  
288 Figures and wrote the first draft of the manuscript; Y. S. and Y. F. accomplished the experiments  
289 and completed the 3D reconstruction and video of the *Caudipteryx* robot; J.-S. supervised the  
290 project and proposed the experiment principle; Y.-S., Y. F., J.-S. and J. K. completed the  
291 Cladogram of *Caudipteryx* and investigation of the feathers of the dinosaurs; J. K. provided the  
292 fossil and analysis of dinosaurs and provided the major suggestions in revision; All authors  
293 discussed the results and commented on the manuscript and contributed ideas to manuscript  
294 development and data analysis.  
295

## 296 References

- 297 1. Ostrom, J.H. Bird flight: how did it begin? *Am. Sci.* **67**, 46–56 (1979).
- 298 2. Forster, C.A., Sampson, S.D., Chiappe, L.M. & Krause, D.W. The theropod ancestry of birds:  
299 new evidence from the late cretaceous of madagascar. *Science* **279**, 1915–1919 (1998).
- 300 3. Garner, J.P., Taylor, G.K. & Thomas, A.L.R. On the origins of birds: the sequence of  
301 character acquisition in the evolution of avian flight. *Proc. R. Soc. Lond. B.* **26**, 1259–1266  
302 (1999).
- 303 4. Sereno, P.C. The evolution of dinosaurs. *Science* **284**, 2137–2147 (1999).
- 304 5. Lewin, R. How did vertebrates take to the air? *Science New Series* **221**, 38–39 (1983).
- 305 6. Gibbons, A. New feathered fossil brings dinosaurs and birds closer. *Science New Series* **274**,  
306 720–721 (1996).
- 307 7. Prum, R.O. Dinosaurs take to the air. *Nature* **421**, 323–324 (2003).
- 308 8. Henderson, D.M. Estimating the masses and centers of mass of extinct animals by 3-d  
309 mathematical slicing. *Paleobiology* **25**, 88–106 (1999).
- 310 9. Ji, S.A., Ji, Q. & Padian, K. Biostratigraphy of new pterosaurs from china. *Nature* **398**, 573–  
311 574 (1999).
- 312 10. Dyke, G.J. & Norell, M.A. *Caudipteryx* as a non avialan theropod rather than a flightless  
313 bird. *Acta Palaeontol Pol.* **50** (1), 101–116 (2005).
- 314 11. Padian, K. When is a bird not a bird? *Nature* **393**, 729–730 (1998).
- 315 12. Qiang, J., Currie, P.J., Norell, M.A. & Shuan, J. Two feathered dinosaurs from northeastern  
316 china. *Nature* **393**, 753–761 (1998).
- 317 13. Swisher, C.C., Wang, Y.Q., Wang, X.L. & Xu, X. Cretaceous age for the feathered dinosaurs  
318 of liaoning, china. *Nature* **400**, 58–61 (1999).
- 319 14. Xu, X., Wang, X.L. & Wu, X.C. A dromaeosaurid dinosaur with a filamentous integument  
320 from the yixian formation of china. *Nature* **401**, 262–266 (1999).
- 321 15. Zhou, Z. The origin and early evolution of birds: discoveries, disputes, and perspectives  
322 from fossil evidence. *Naturwissenschaften* **91**, 455–471 (2004).
- 323 16. Xu, X. *et al.* Four-winged dinosaurs from china. *Nature* **421**, 335–340 (2003).
- 324 17. Zhou, Z. & Zhang, F.C. Origin and early evolution of feathers: evidence from the early  
325 cretaceous of china. *Acta Zoologica Sinica* 125–128 (2006).
- 326 18. Zhou, Z. & Wang, X. A new species of *Caudipteryx* from the yixian formation of liaoning,  
327 northeast china. *Vertebr. Palasiat* **38**, 104–122 (2000).
- 328 19. Zhou, Z., Barrett, P.M. & Hilton, J. An exceptionally preserved lower cretaceous ecosystem.  
329 *Nature* **421**, 807–814 (2003).

- 330 20. Jones, T.D., Farlow, J.O., Ruben, J.A, Henderson, D.M. & Hillenius, W.J. Cursoriality in  
331 bipedal archosaurs. *Nature* **406**, 716–718 (2000).
- 332 21. Norell, M., Ji, Q., Gao, K., Yuan, C., Zhao, Y. & Wang, L. Modern feathers on a non-volant  
333 dinosaur. *Nature* **416**, 36–37 (2002).
- 334 22. Lee, M.S.Y., Cau, A., Naish, D. & Dyke, G.J. Sustained miniaturization and anatomical  
335 innovation in the dinosaurian ancestors of birds. *Science* **345**, 562–566 (2014).
- 336 23. Zhou, Z. Evolutionary radiation of the jehol biota: chronological and ecological  
337 perspectives. *Geol. J.* **41**, 377–393 (2006).
- 338 24. Zhou, Z., Wang, X.L., Zhang, F.C. & Xu, X. Important features of *Caudipteryx* evidence  
339 from two nearly complete new specimens. *Vertebr Palasiat* **38**, 241–254 (2000).
- 340 25. Norberg, U.M. *VERTEBRATE FLIGHT IN ZOOPHYSIOLOGY*. p. ISBN: 9783642838507  
341 (1989).
- 342 26. Delaurier, J.D. & Larijani, R.F. A Nonlinear Aeroelastic Model for the Study of Flapping  
343 Wing Flight. pp. Chapter 18, *Published by the American Institute of Aeronautics and*  
344 *Astronautics* (2001).
- 345 27. Delaurier, J.D. An aerodynamic model for flapping wing flight. *Aeronautical journal* **97**,  
346 125–130 (1993).
- 347 28. Delaurier, J.D. The development of an efficient ornithopter wing. *Aeronautical journal* **97**,  
348 153–162 (1993).
- 349 29. Delaurier, J.D. An ornithopter wing design. *Canadian Aeronautics and space Journal* **40**,  
350 10–18 (1994).
- 351 30. Delaurier, J.D. Drag of wings with cambered airfoils and partial leading edge suction.  
352 *Journal of Aircraft* **20**, 882–886 (1983).
- 353 31. Delaurier, J.D. The development and testing of a full-scale piloted ornithopter. *Canadian*  
354 *Aeronautics and Space Journal* **45**, 72–82 (1999).
- 355 32. Delaurier, J.D. & Harris J.M. A study of mechanical flapping wing flight. *Aeronautical*  
356 *Journal* **97**, 277–286 (1993).
- 357 33. Jones, R.T. The Unsteady Lift of a Wing of Finite Aspect Ratio. p. *NACA Report* 681 (1940).
- 358 34. Hoerner, S.F. Fluid dynamic drag. *Brick Town, NJ* **2**, 1–16 (1965).
- 359 35. Garrick, I.E. Propulsion of a Flapping and Oscillating Aerofoil. p. *NACA Report* 567 (1936).
- 360 36. Hoerner, S.F. Pressure drag, fluid dynamic drag. *Brick Town, NJ*, 3–16 (1965).
- 361 37. Christiansen, P. & Farina, R.A. Mass prediction in theropod dinosaurs. *Historical Biology*.  
362 **16(2-4)**, 85-92 (2004).
- 363 38. Hutchinson, J.R. & Allen, V. The evolutionary continuum of limb function from early  
364 theropods to birds. *Naturwissenschaften*. DOI 10.1007/s00114–008–0488–3 (2008).
- 365 39. Robertson, A.M.B & Biewener, A.A. Muscle function during takeoff and landing flight in  
366 the pigeon (*Columba livia*). *The Journal of Experimental Biology* **215**, 4104–4114 (2012).
- 367 40. Benton, M.J. *VERTEBRATE PALEONTOLOGY*. Third edition 2005, *Blackwell Science Ltd*  
368 (2005).
- 369 41. Kovacs, C.E. & Meyers, R.A. Anatomy and histochemistry of flight muscles in a wing-  
370 propelled diving bird, the atlantic puffin, *fratercula arctica*. *journal of morphology* **244**, 109–  
371 125 (2000).
- 372

## 373 **Supporting information**

374 **S1 Text. Supplementary materials.**

375

376 **S1 Fig. Reconstructed *Caudipteryx* via software in accordance with the fossil.**

377 Bernoulli effect and lift, thrust, weight and drag loads are represented along the wing span [2].

378

379 **S2 Fig. Variations of flapping and pitch angle in a cycle.**

380

381 **S3 Fig. Variation in required metabolic power with flapping frequency at any velocity of**  
382 ***Caudipteryx*.**

383

384 **S4 Fig. Variation in lift, thrust and power with flapping angle ( $\Gamma_0$ ) in a cycle when  $U$  is 0.05**

385 **m/s.**

386

387 **S5 Fig. Variation in lift, thrust and power with  $\bar{\theta}_w$  in a cycle when  $U$  is 0.05 m/s.**

388

389 **S6 Fig. Variation in lift, thrust and power with dynamic twist angle ( $\beta_0$ ) in a cycle and when**  
390 **the velocity is almost zero.**

391

392 **S7 Fig. Variation in lift and drag with velocity in half of a cycle (downstroke) and high value**  
393 **of  $\bar{\theta}_w$ .**

394

395 **S8 Fig. Variation in lift, thrust and required metabolic power with flapping frequency when**  
396 **the velocity is almost zero ( $U=0.05$  m/s).**

397

398 **S9 Fig. Variation in lift and thrust with velocity at any flapping frequency of *Caudipteryx*.**

399

400 **S10 Fig. Lift and thrust changes along the wingspan.**

401 When the velocity is almost zero and in one cycle with the parameters shown in the Figure for  
402 types **A**, **B**, **C** and **D**, variations of lift and thrust forces in any element of wing from base to the  
403 tip are represented in top segment. Also the changes of lift and thrust in one cycle are illustrated  
404 in bottom segment of the Figure.

405

406 **S11 Fig. Reconstructed model (type A) of *Caudipteryx* on the test rig.**

407

408 **S12 Fig. Lift and thrust forces of each element of wing of *Caudipteryx* (type A).**

409 (A), Resultant forces in one cycle. The wing of *Caudipteryx* is divided into ten elements along the  
410 wing span to better quantify the flight loads of each segment. (B), Variations of insignificant values  
411 of lift and thrust of whole wing in a cycle when the considered frequency is one. (C) and (D),  
412 Variations of insignificant values of thrust and lift of each segment of the wing to compare with  
413 each other's. These values are computed for given parameters when the velocity of airflow is

414 0.05m/s and wing beat is equal to one in a cycle. It is obvious that by increasing flapping frequency  
415 the value of load increases.

416  
417 **S13 Fig. Comparison of each element along the wingspan by measuring lift and thrust (type**  
418 **A).**

419 To compare any element along the wingspan of *Caudipteryx* and capture the properties of each  
420 segment, the insignificant values of lift and thrust of ten elements for the given parameters were  
421 deduced supposing the wing beat was one in a cycle. Lift from elements 4 to 9 and thrust from  
422 elements 2 to 9 considering distance to the wing root are meaningful but the wing tip (element 10)  
423 has insignificant value.

424  
425 **S14 Fig. Comparison of all elements along the wingspan of *Caudipteryx* at any wing beat by**  
426 **measuring lift and thrust (type A).**

427 Lift and thrust change from the base to the tip element by element at different flapping frequencies  
428 when the given parameters are  $\bar{\theta}_a = 0^\circ$ ,  $\bar{\theta}_w = 15^\circ$ ,  $\alpha_0 = 30^\circ$ ,  $\beta_0 = 180^\circ$  and  $\Gamma_0 = 22.5^\circ$ . The  
429 significant values of lift and thrust began from somewhere ahead of the wing base between  
430 elements 3 and 4 to the wing tip (element 9) at any flapping frequency.

431  
432 **S15 Fig. Influence of aerodynamic forces on unfolded wing of *Caudipteryx* at some fixed**  
433 **flapping angles during running (this process can happen in the downstroke).**

434 (A) and (B),  $F_w$  is the transverse force composed of three components of thrust/drag in motion, lift  
435 in vertical and a force along the wingspan direction. (C), Wing of *Caudipteryx* is supposed to be  
436 fixed in six flapping angles ( $\beta$  is equal to -10, -5, 0, 5, 10, 20 degrees) and twisted along the wing  
437 span similar to modern birds.

438  
439 **S16 Fig. Airflow around the wing.**

440 (A), in order to simulate all states in the same condition, all cases are compared and arranged  
441 together. Hence, airflow goes through all states of the wing of *Caudipteryx* at the velocity of 8 m/s,  
442 it is shown around the wing. (B), Displacement (in meters) of the nodes of airflow while passing  
443 the wing.

444  
445 **S17 Fig. Airflow produces pressure (in Pascals) on the top and bottom surfaces of the wing.**  
446 In bottom surface, the value of pressure is higher than that in the top surface. This creates lift force.  
447 Therefore, for different flapping angle, the gradient of pressure must be positive to generate lift.

448  
449 **S18 Fig. Displacement and stress of a wing.**

450 (A), Displacement of the wing of *Caudipteryx* in meters. The wing lead has most deflection for  
451 any flapping angle. (B), Stress on the wing of *Caudipteryx* under the effect of airflow in Pascals  
452 (the speed of airflow is 8 m/s). The wing base (shoulder joint) and forelimb skeleton bear most  
453 bending and torsional stresses.

454  
455 **S19 Fig. Reaction forces and moments of the wing of *Caudipteryx*.**

456 (A), the reaction forces and moments are illustrated (the *Caudipteryx*'s velocity is 8 m/s in each  
457 state). (B), Point loads (N) at any nodes and related vectors. The average of transverse force in all  
458 cases are composed of three components, thrust/drag force in motion, lift in vertical and a force  
459 along the wingspan direction. It illustrates that thrust can appear in some flapping angles and the  
460 aerodynamic force in wingspan direction is useful to expand the wing.

461  
462 **S20 Fig. The force in horizontal and vertical directions versus the flapping angle from -10 to**  
463 **20 deg.**

464 The average lift and thrust/drag forces generated by simulated wing of *Caudipteryx* under the effect  
465 of airflow are different in various cases. It depends on the wingspan, flapping and twist angles of  
466 the wing and the general thickness of the wing along the span (each section/airfoil has its own  
467 properties such as angle of attack along the wing). For the sake of similarity to downstroke process,  
468 angles of attack along the wingspan are assigned in such a way that the possibility of thrust force  
469 becomes more than that of drag. Hence, from the flapping angle of -10 to 20 degrees, the possibility  
470 of having thrust force is more than that of drag. In addition, in this case, the possible lift force  
471 occurs from 5 degrees to 16 degrees for the flapping angles. Namely, only in these angles, the wing  
472 has lift and thrust at the same time. Therefore, *Caudipteryx* could obtain lift and thrust if it adjusted  
473 its wings in a proper flapping and pitching angles by using its unfolded wings during running fast.  
474 It is obvious that *Caudipteryx* could adjust its wings to get lift and drag at the same time.

475  
476 **S21 Fig. Simulation of simplified model of rectangular wing.**

477 Velocity vectors of airflow around the rectangular plate (both bottom surface and upper surface of  
478 the rectangular wing) in various angles of attack ( $0^\circ$  to  $90^\circ$ ) under the effect of initial velocity of  
479  $v_1 = 8$  m/s. The stalling occurs after 45 degrees, hence, drag force increases. The maximum speed  
480 of the airflow around the plate is 16 m/s (twice of inlet speed) near the edges.

481  
482 **S1 Table.** Comparison between different modern birds in self-weight, wing area, wing loading  
483 ( $W/S$ ), wing span and velocity [4]. The values of velocity are calculated from equation (2). In  
484 general, larger birds have to fly faster.

485  
486 **S2 Table.** Lift and thrust forces of reconstructed robot of *Caudipteryx* on the test rig (Type A) at  
487 different velocities.

488  
489 **S3 Table.** Comparison between modern birds in body mass, wing area, flap angle, wing beat and  
490 velocity.

491  
492 **S4 Table.** Comparison between flightless dinosaurs in body mass, wing area, flap angle, wing span  
493 and wing loading.

494  
495 **Data Availability Statement:** All relevant data are within the paper and its Supporting Information  
496 files.

497  
498 **Competing interests:** The authors have declared that no competing interests exist.

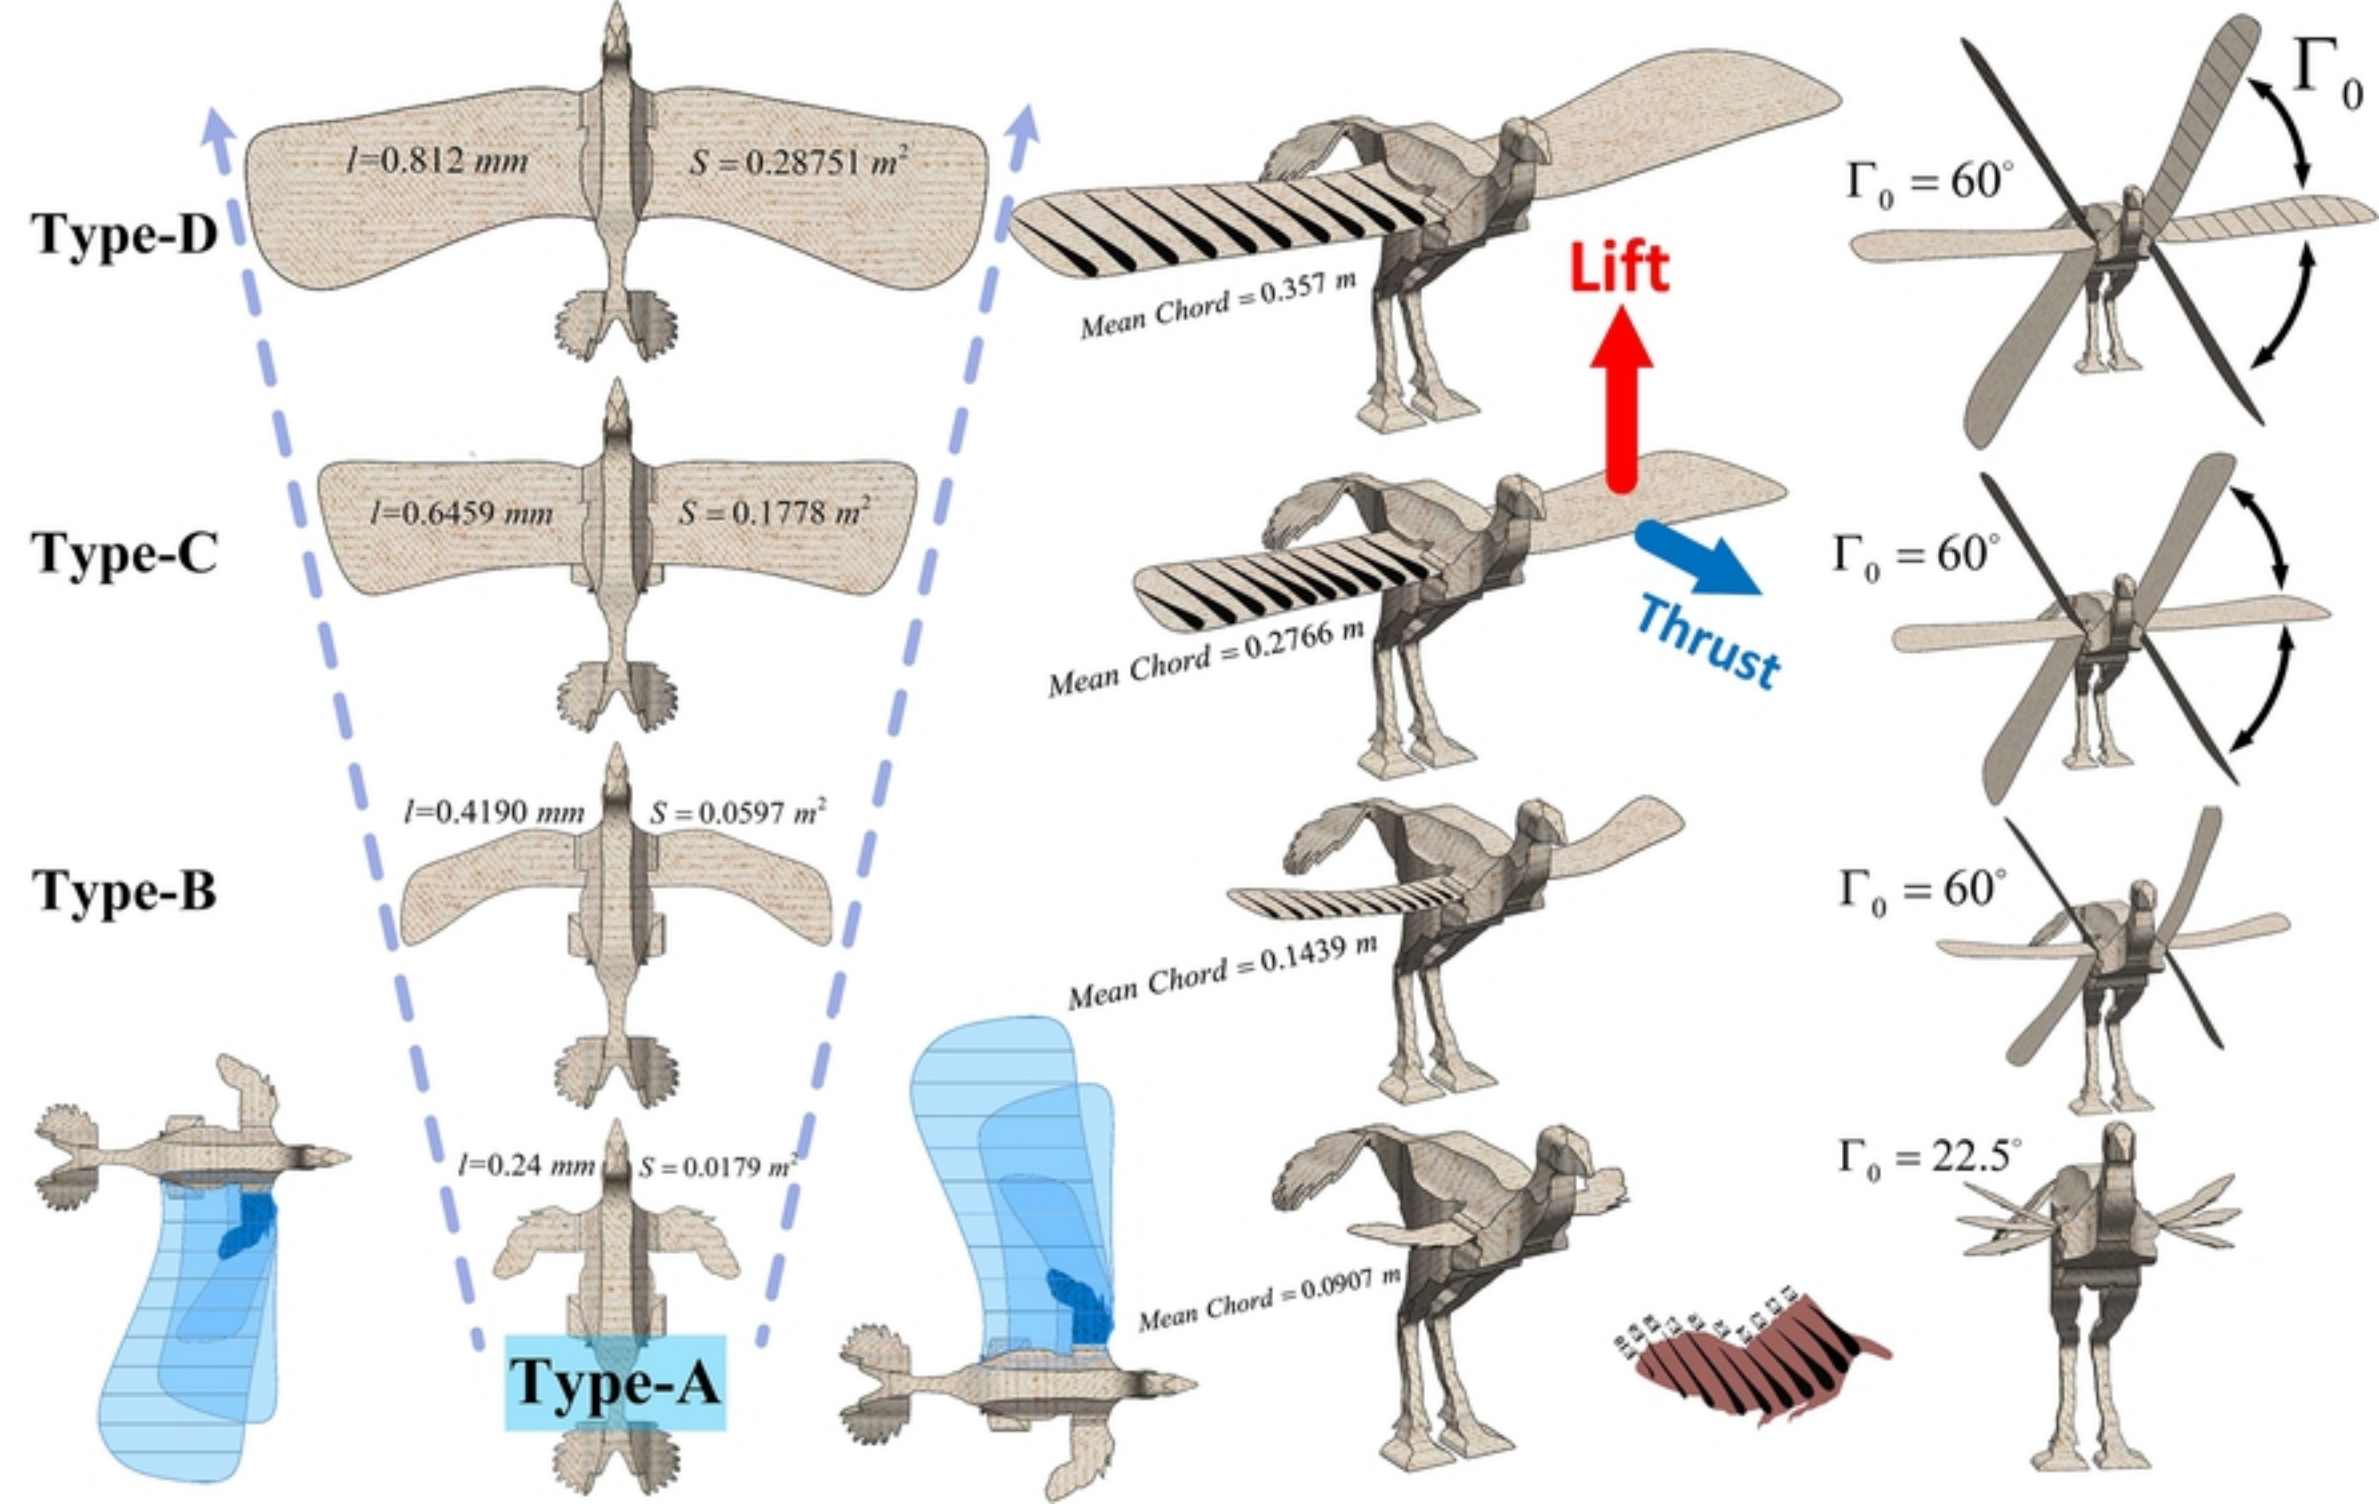

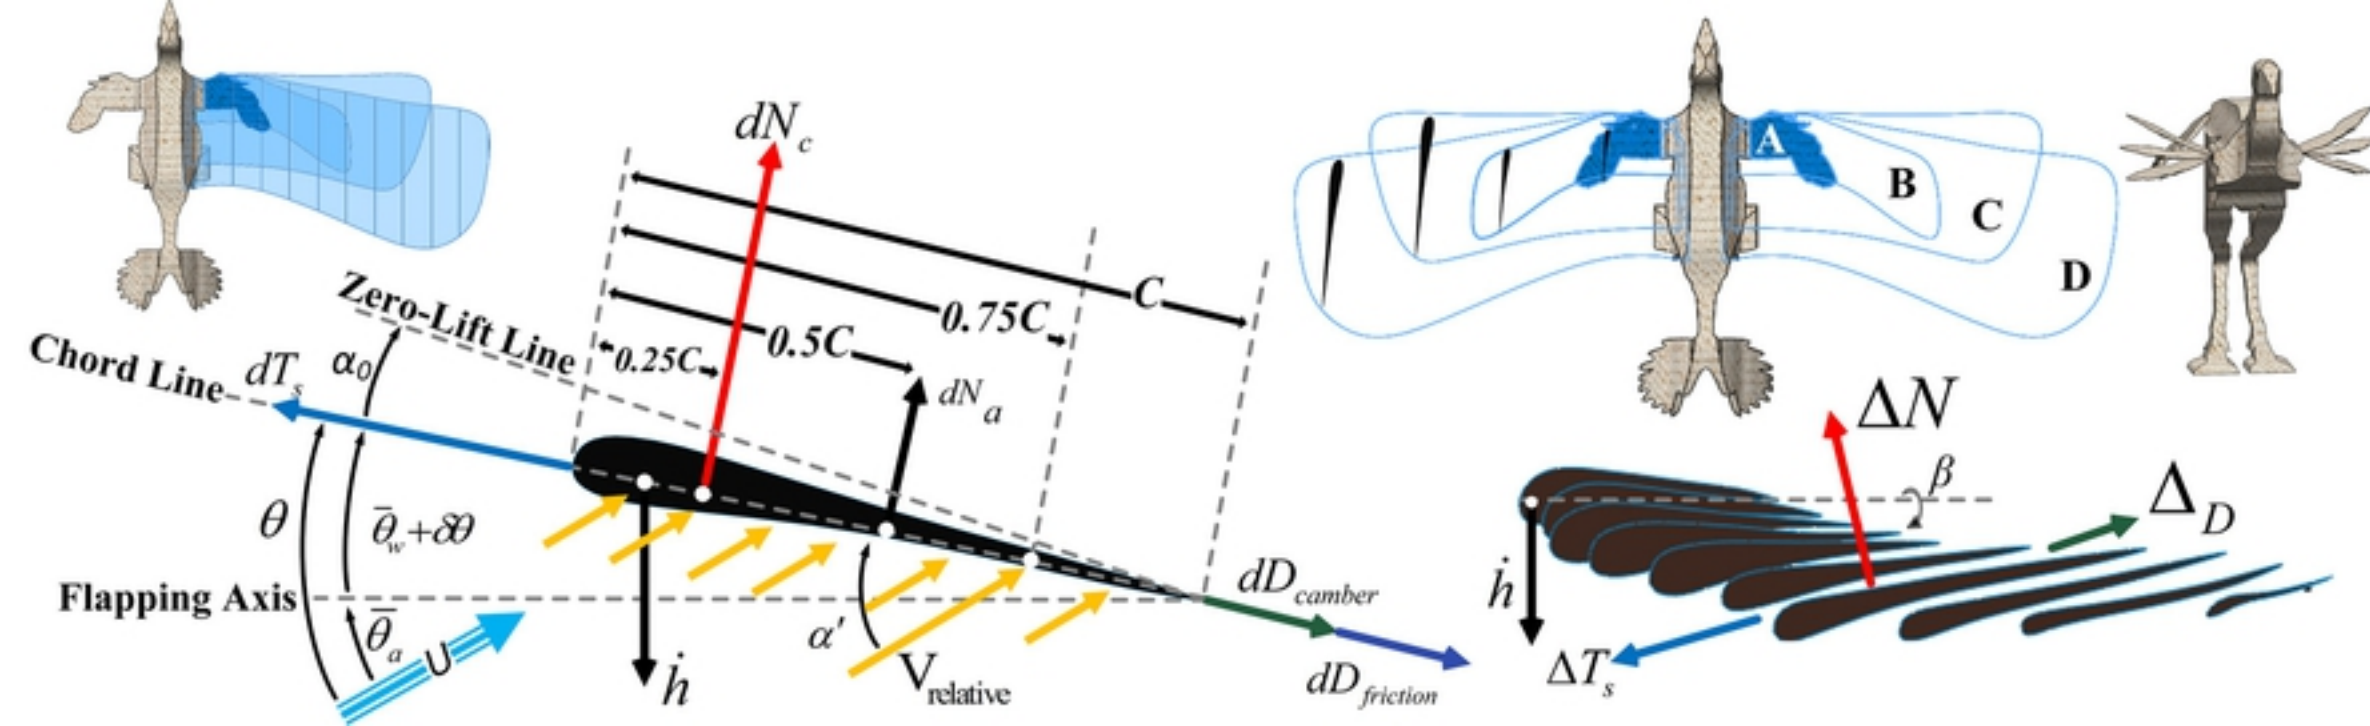



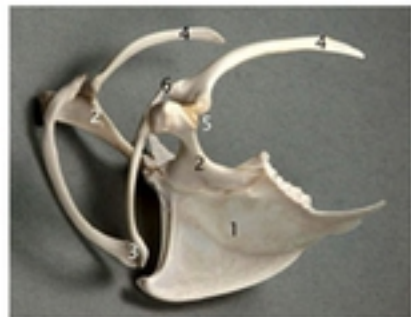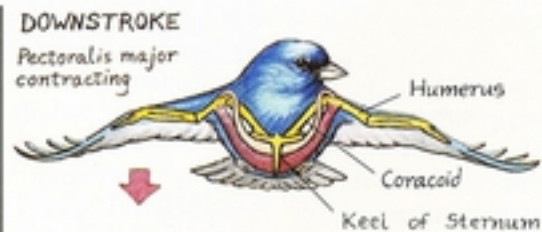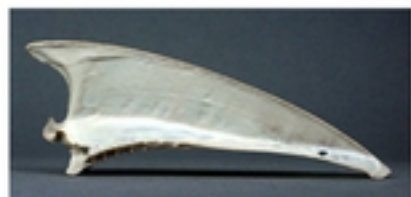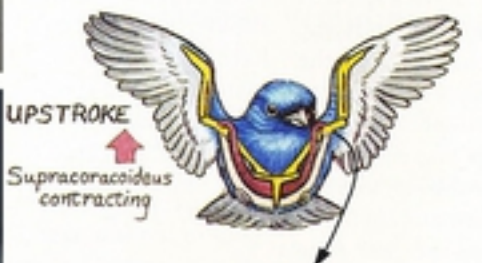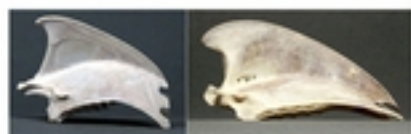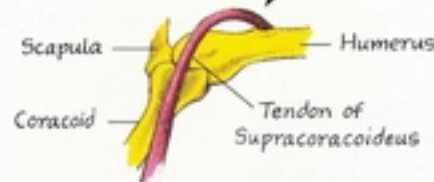

1. Sternum / breastbone
2. Coracoid
3. Clavicles / furcula
4. Scapula
5. Joint with the wing
6. Foramen trioceum

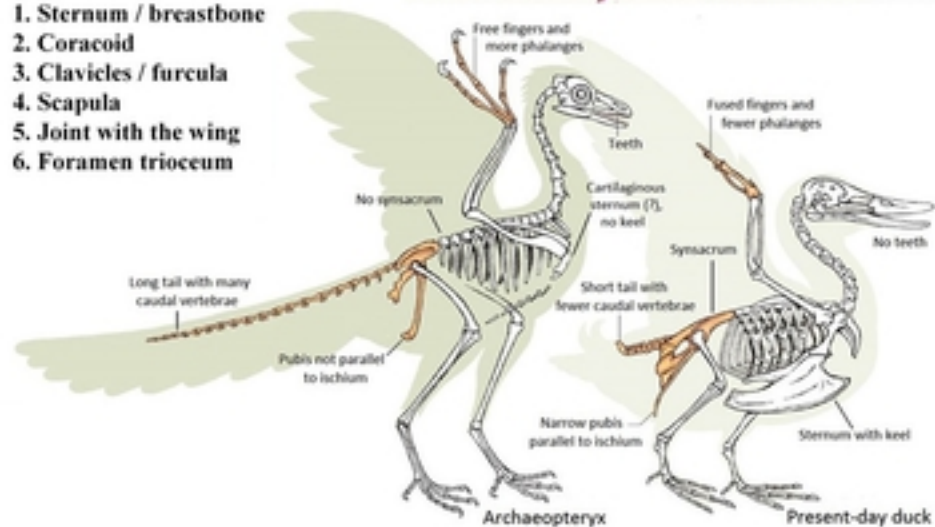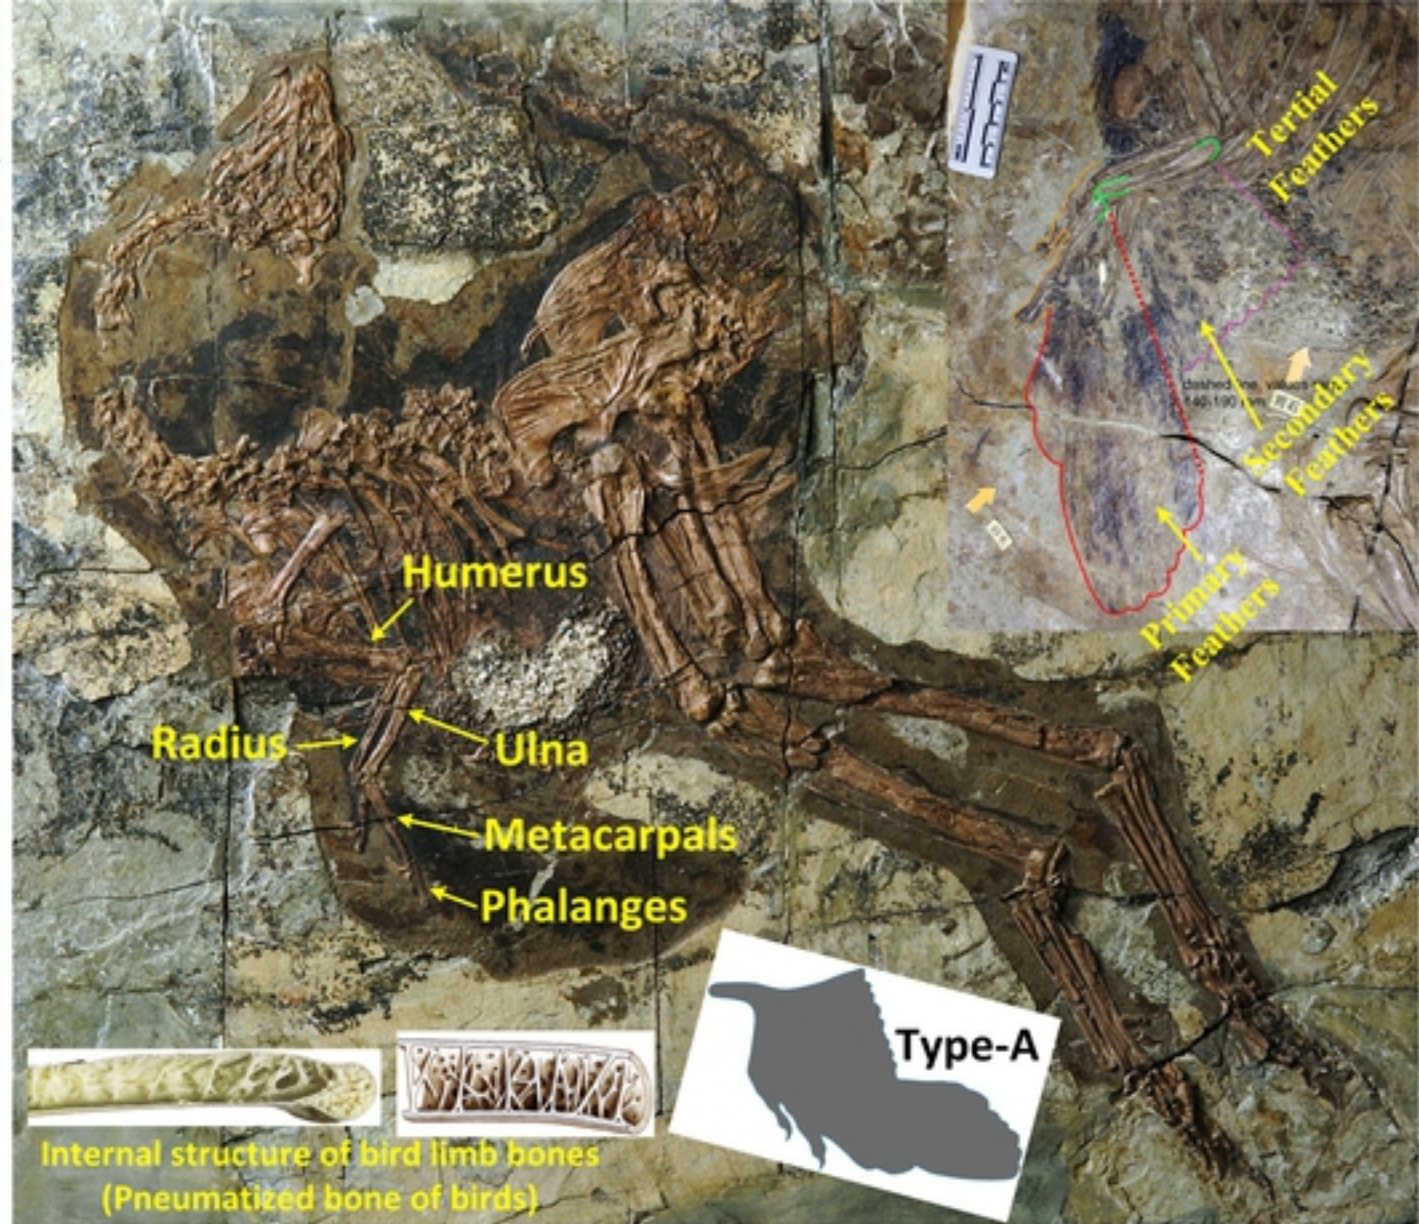

### Type - A

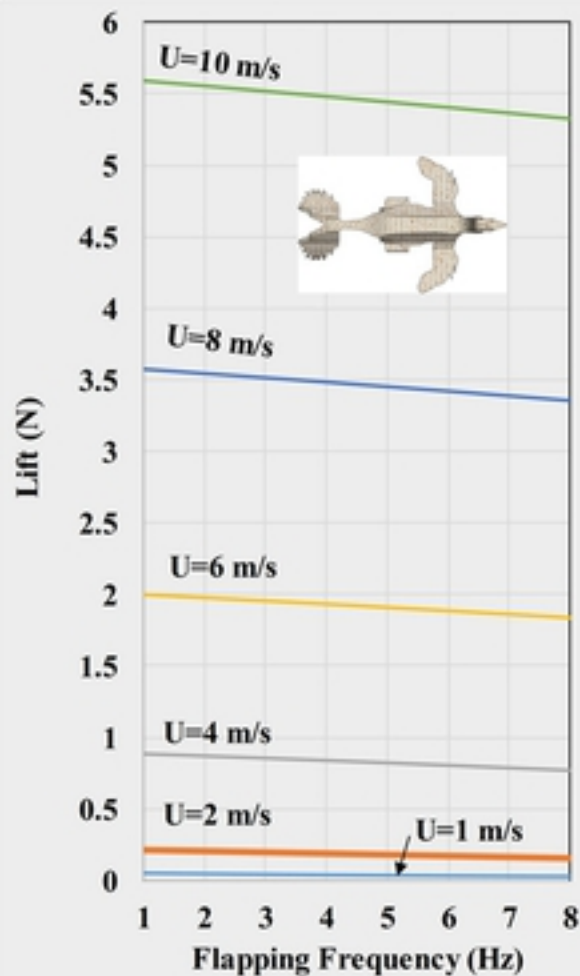

### Type - B

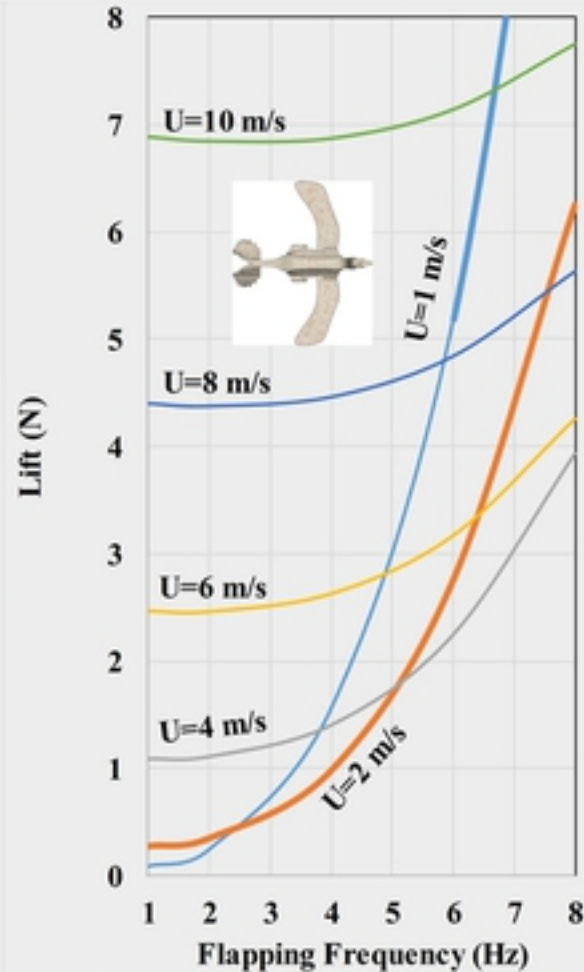

### Type - C

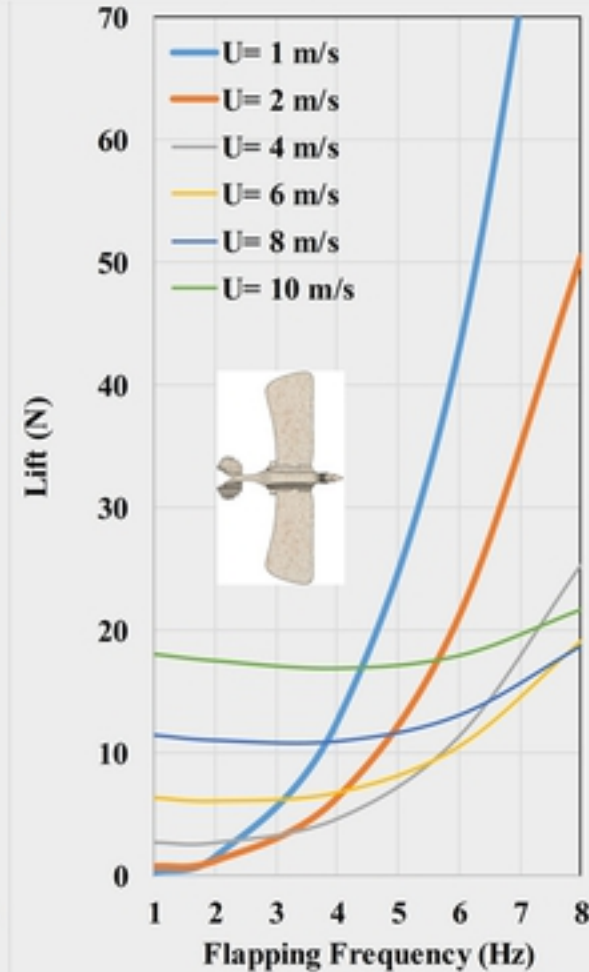

### Type - D

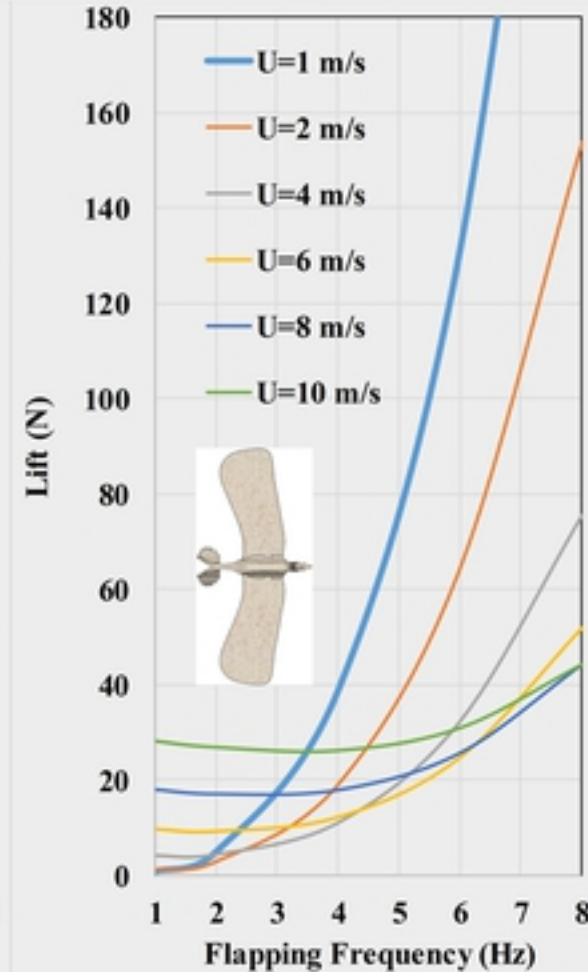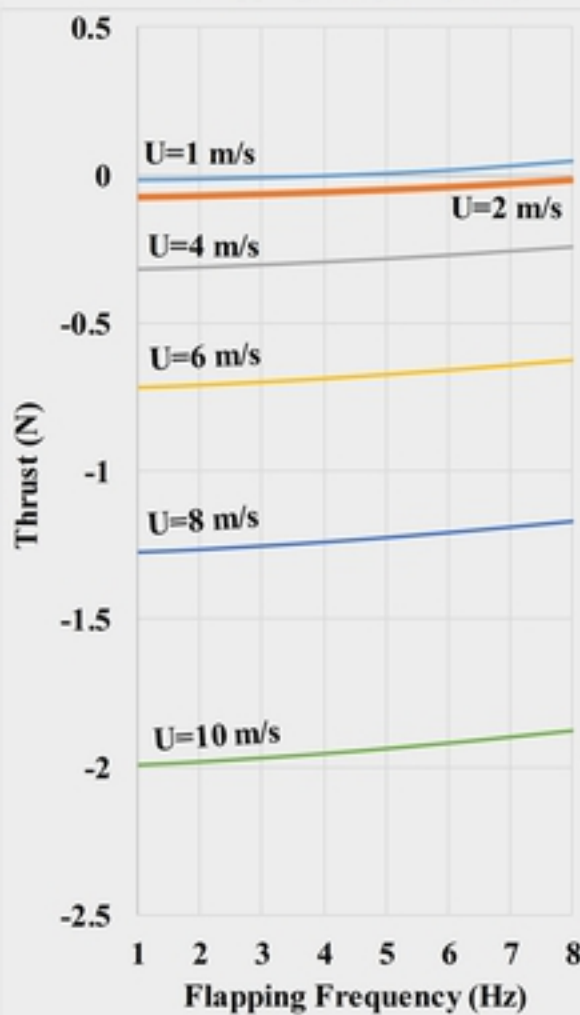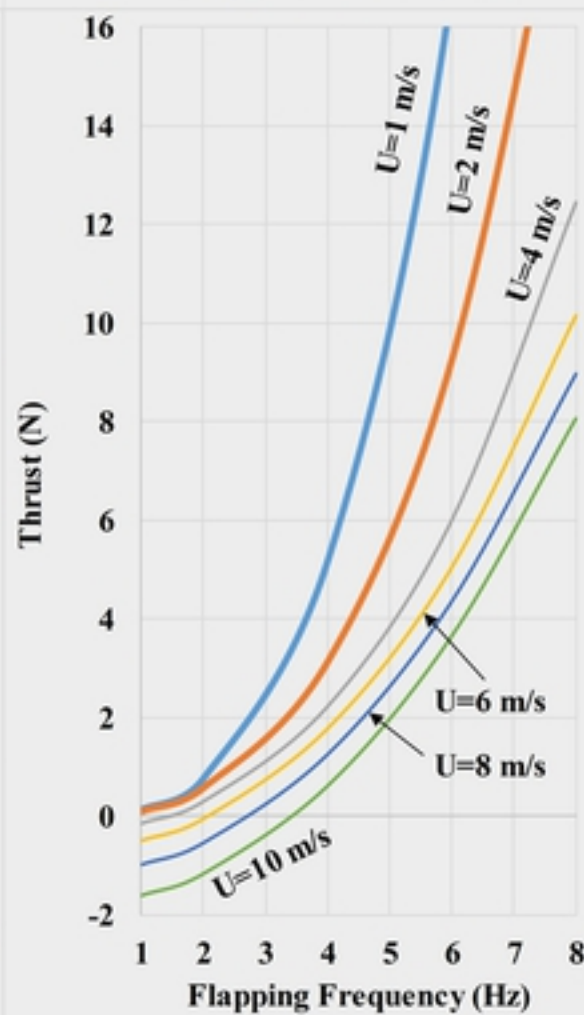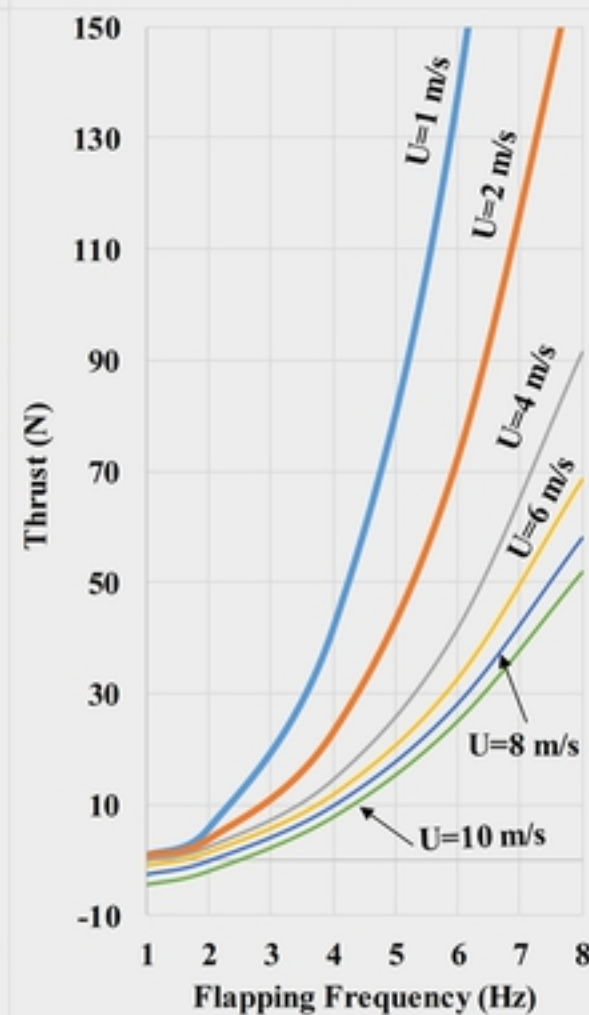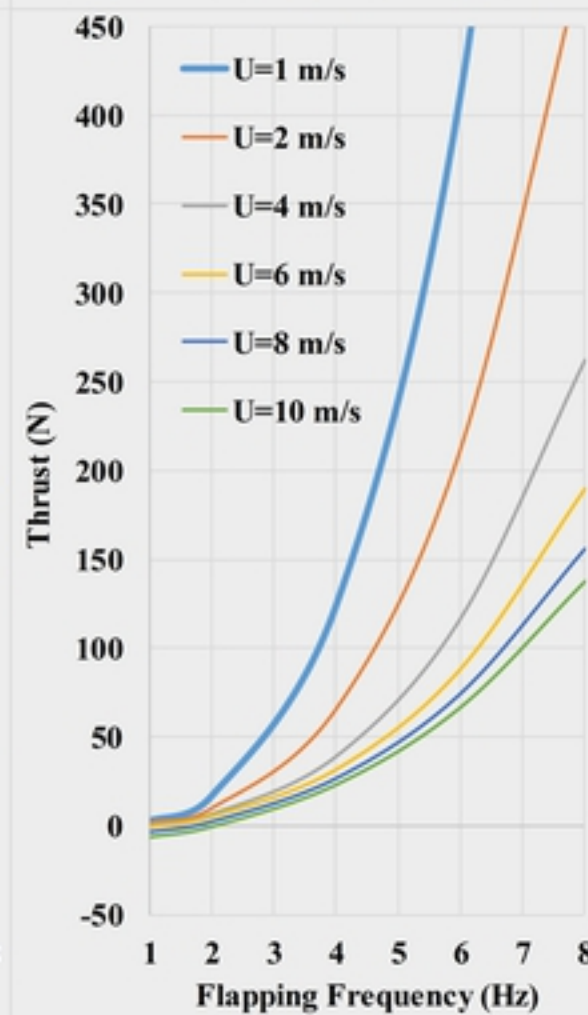

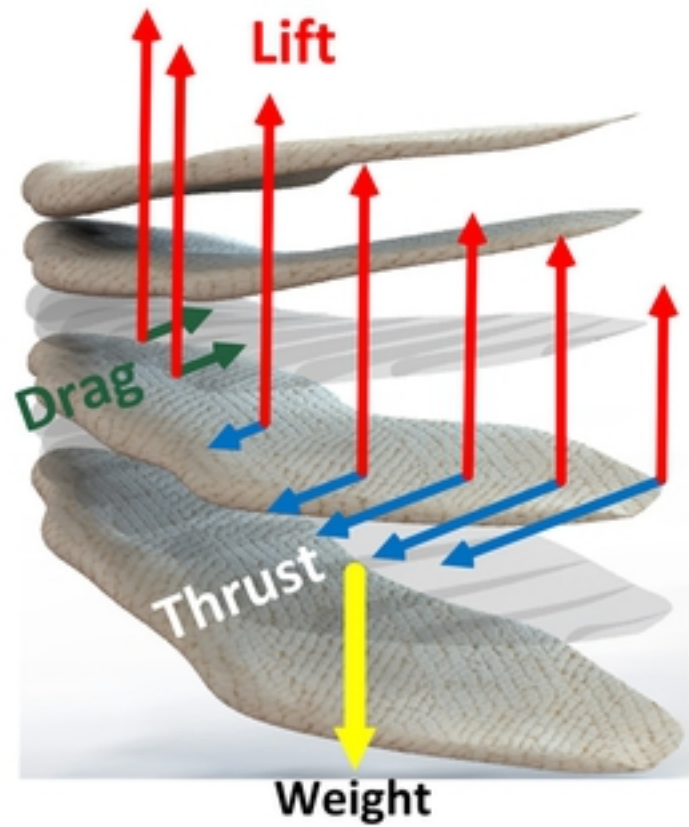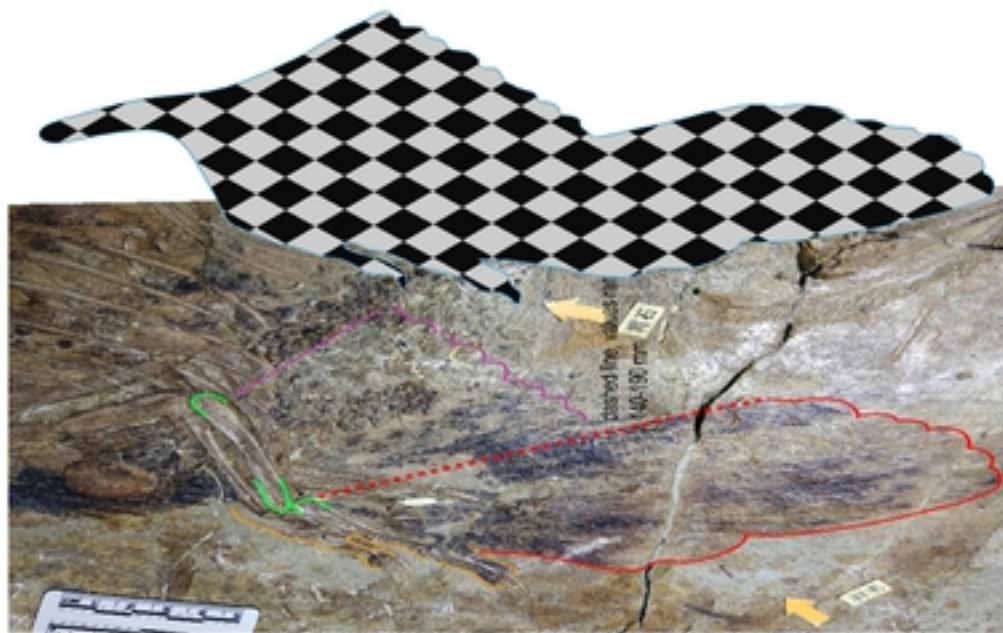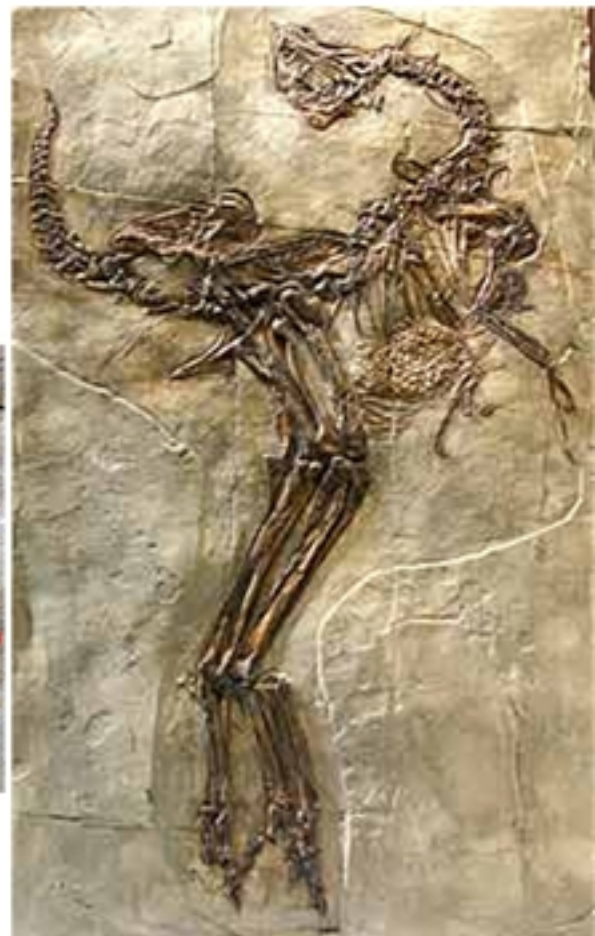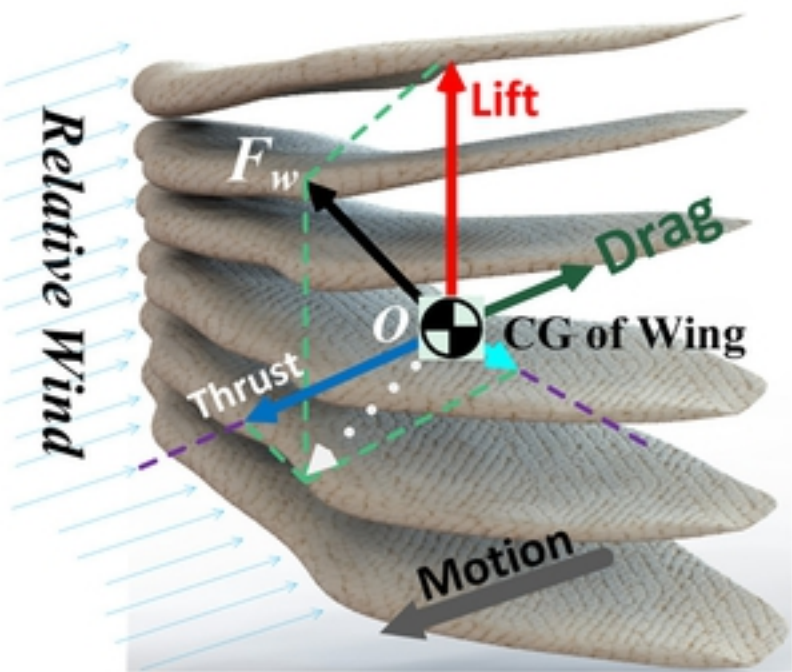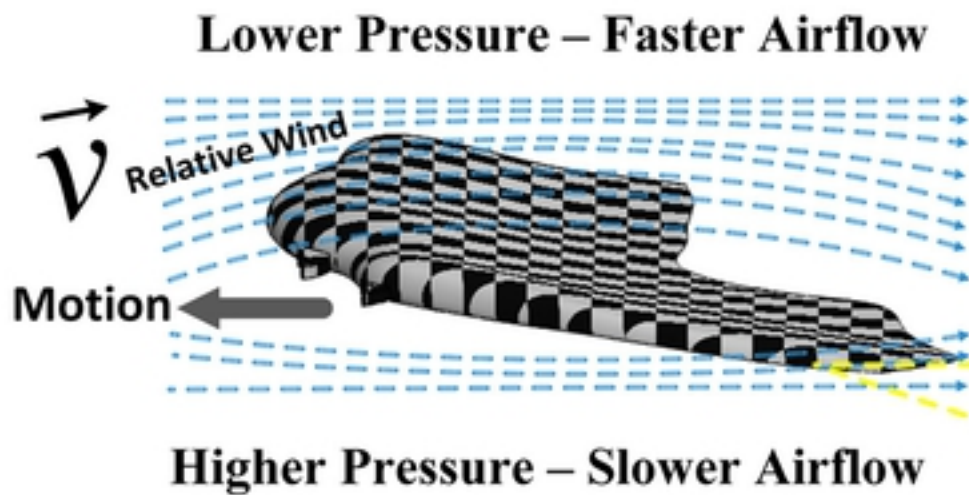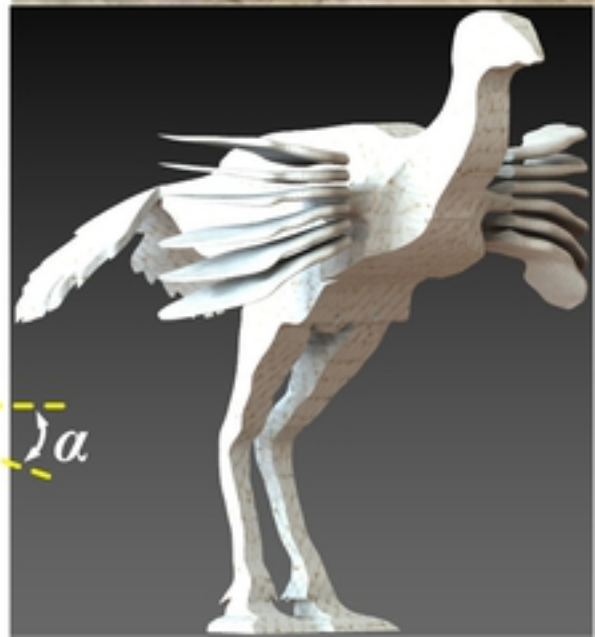

Flapping/Pitch Angles

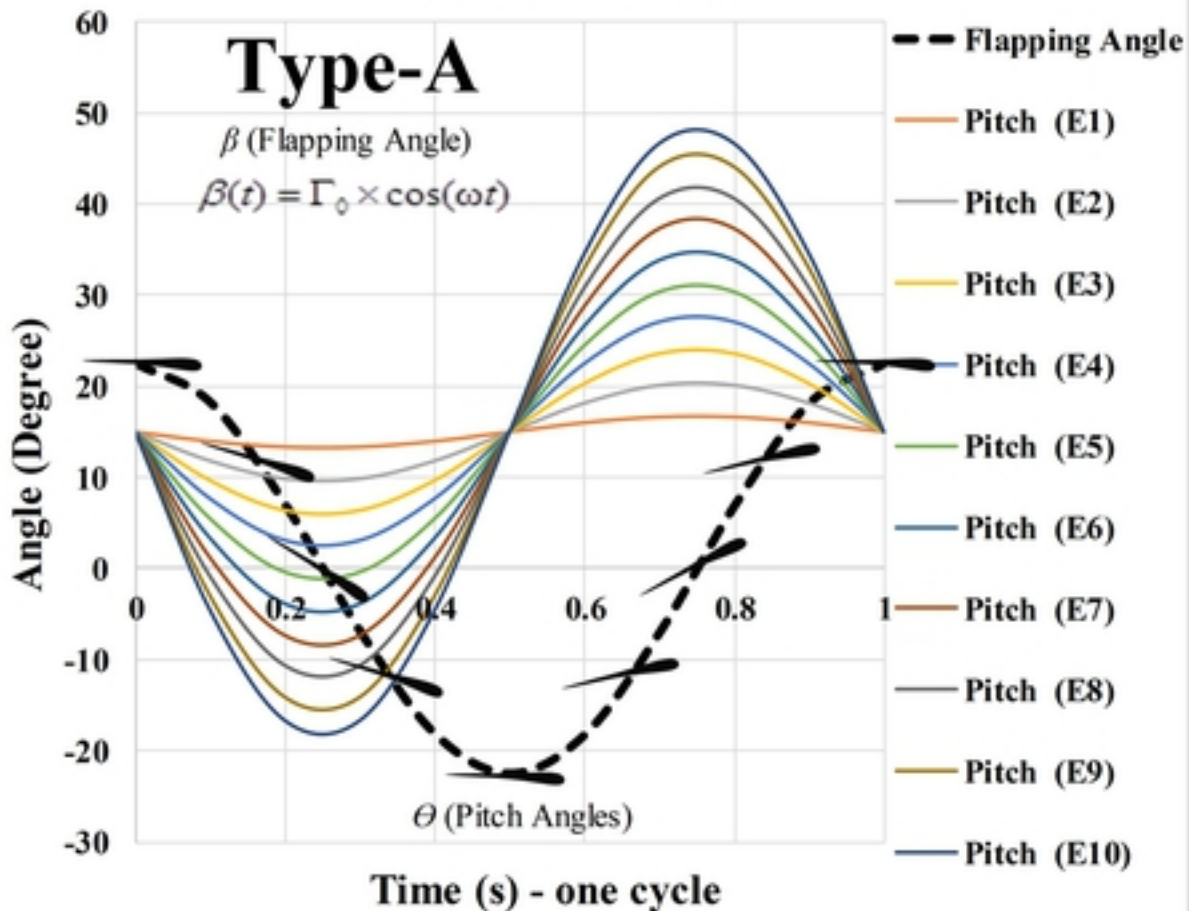

Flapping/Pitch Angles

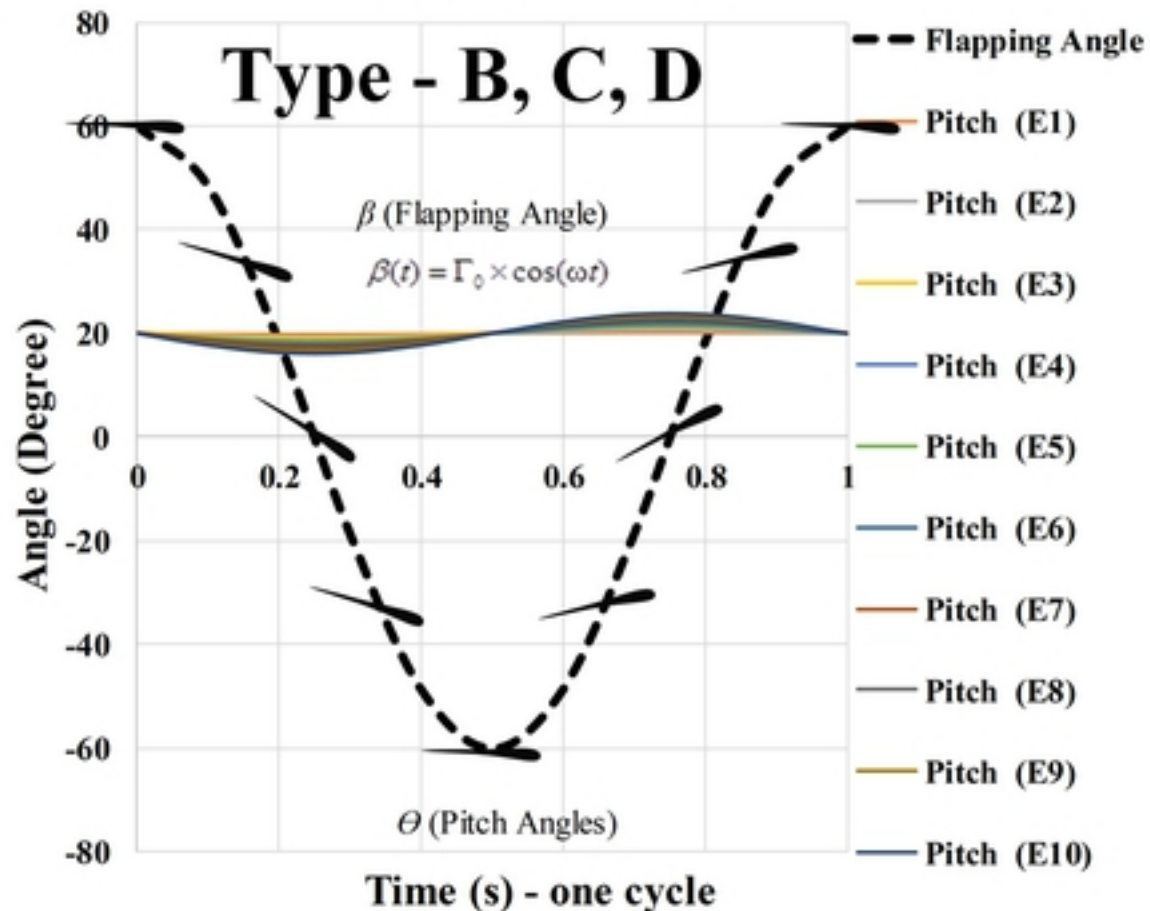

## Type - A

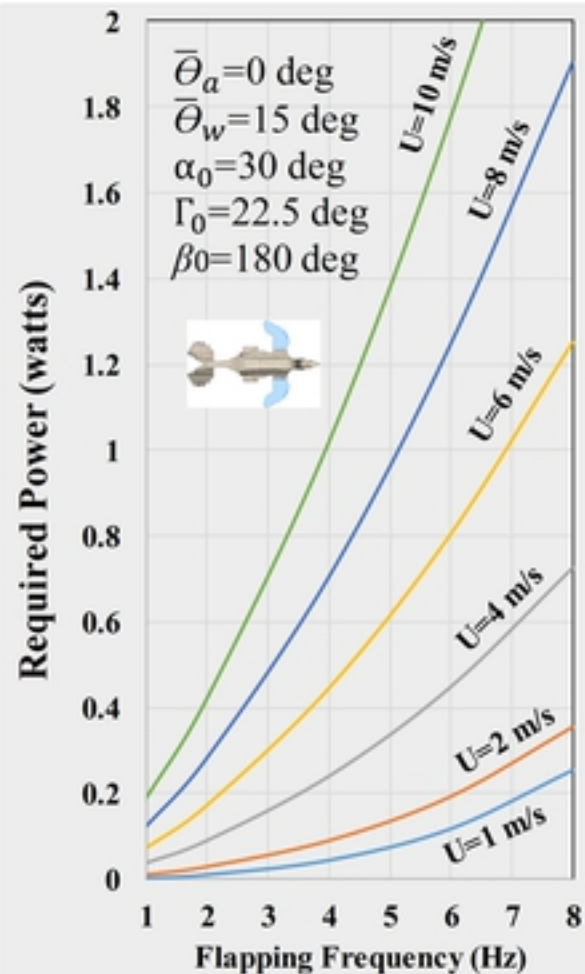

## Type - B

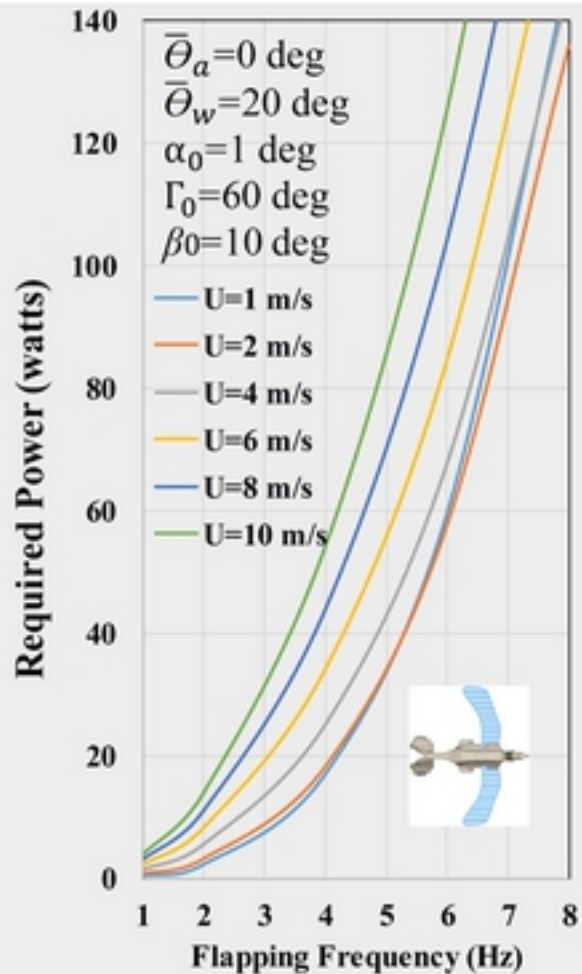

## Type - C

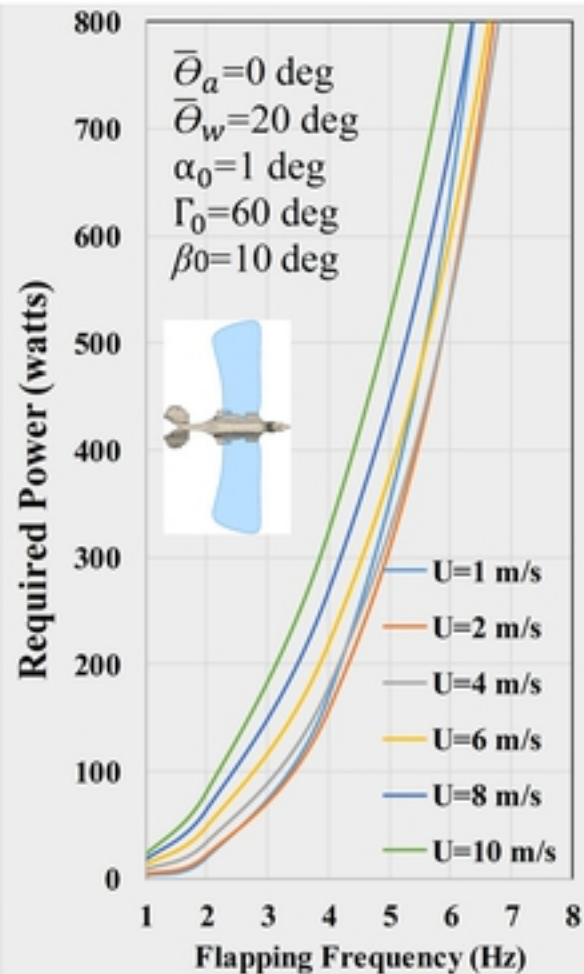

## Type - D

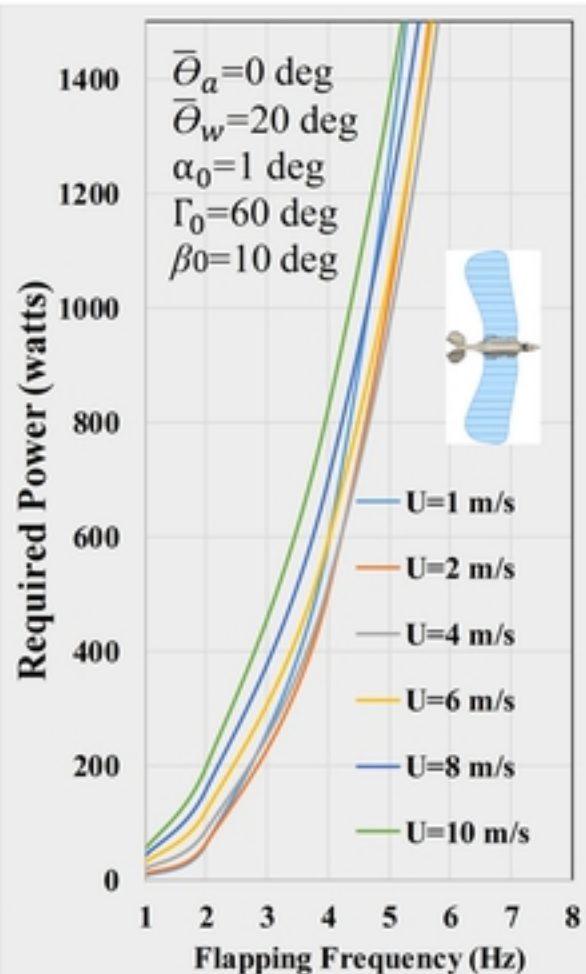

### Lift vs $\Gamma_0$ (deg)

$\bar{\theta}_\alpha=0$  deg,  $\bar{\theta}_w=20$  deg,  $f=1$  Hz  $\alpha_0=1$  deg,  $U=0.05$  m/s

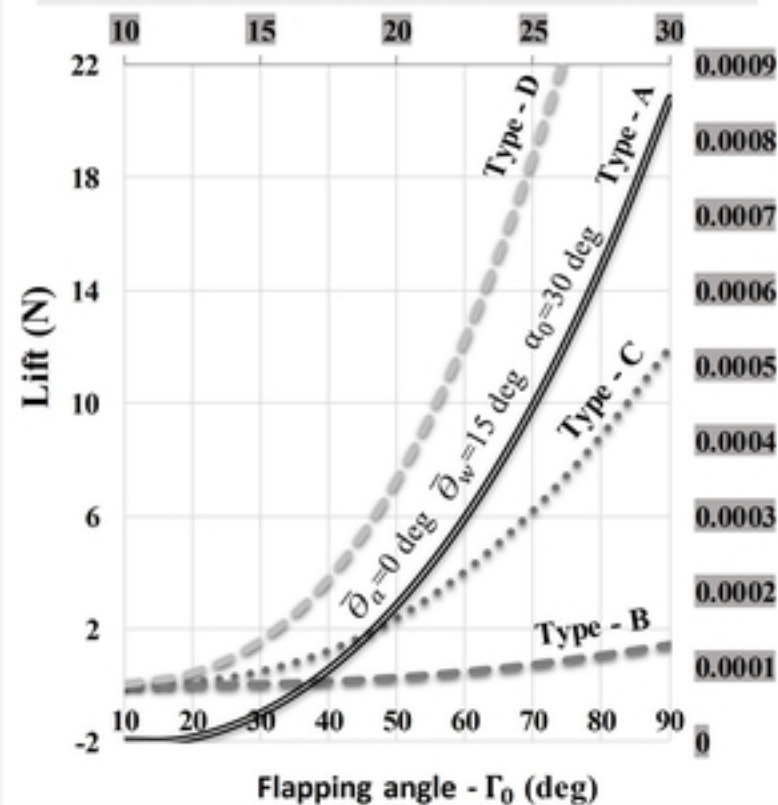

### Thrust vs $\Gamma_0$ (deg)

$\bar{\theta}_\alpha=0$  deg,  $\bar{\theta}_w=20$  deg,  $f=1$  Hz  $\alpha_0=1$  deg,  $U=0.05$  m/s

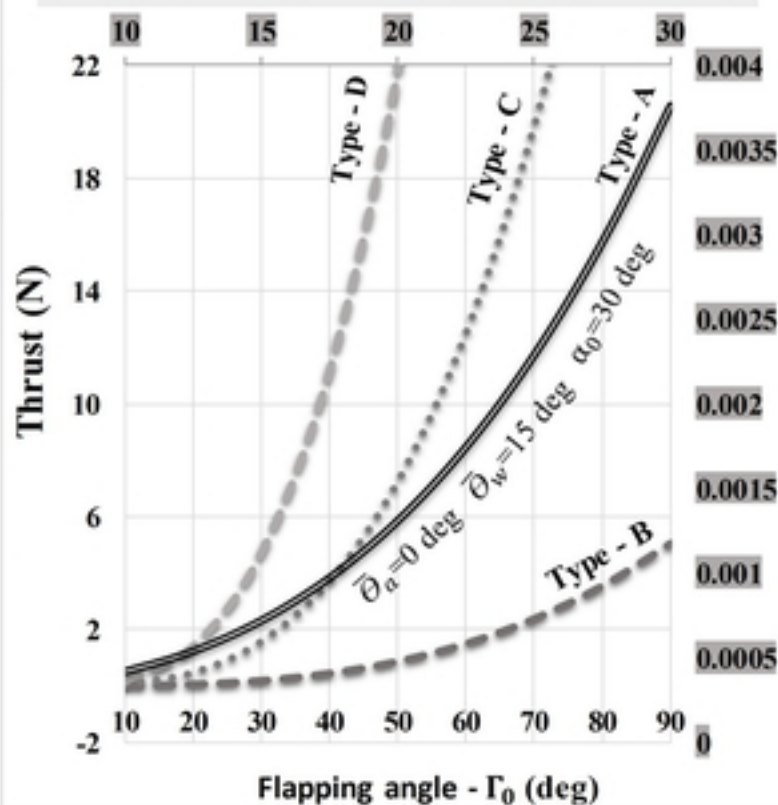

### Required Power vs $\Gamma_0$ (deg)

$\bar{\theta}_\alpha=0$  deg,  $\bar{\theta}_w=20$  deg,  $f=1$  Hz  $\alpha_0=1$  deg,  $U=0.05$  m/s

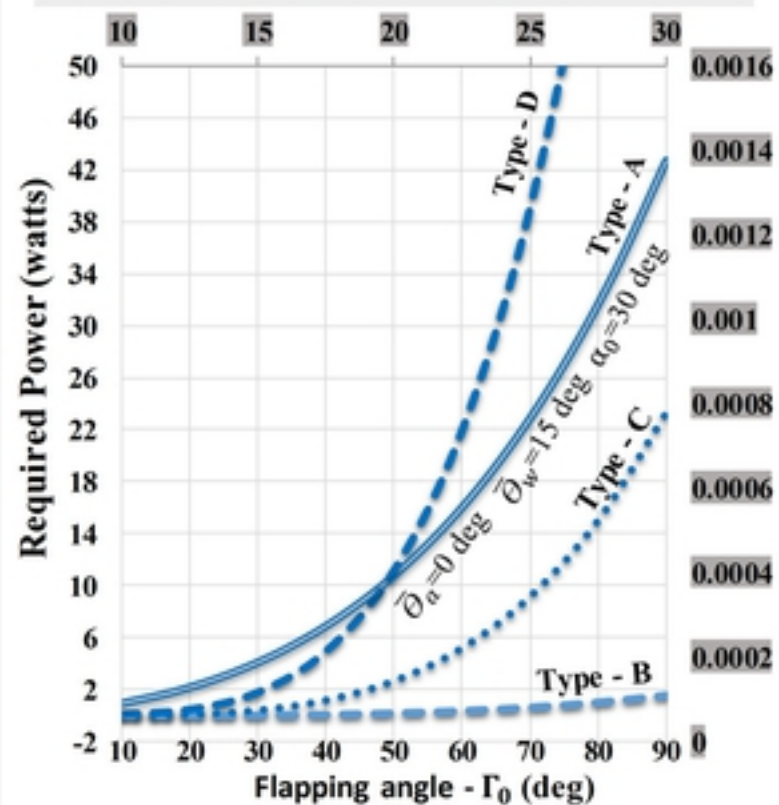

### Lift vs $\bar{\theta}_w$ (deg)

$\bar{\theta}_\alpha=0$  deg,  $f=1$  Hz,  $\alpha_0=1$  deg  $\Gamma_0=60$  deg,  $U=0.05$  m/s

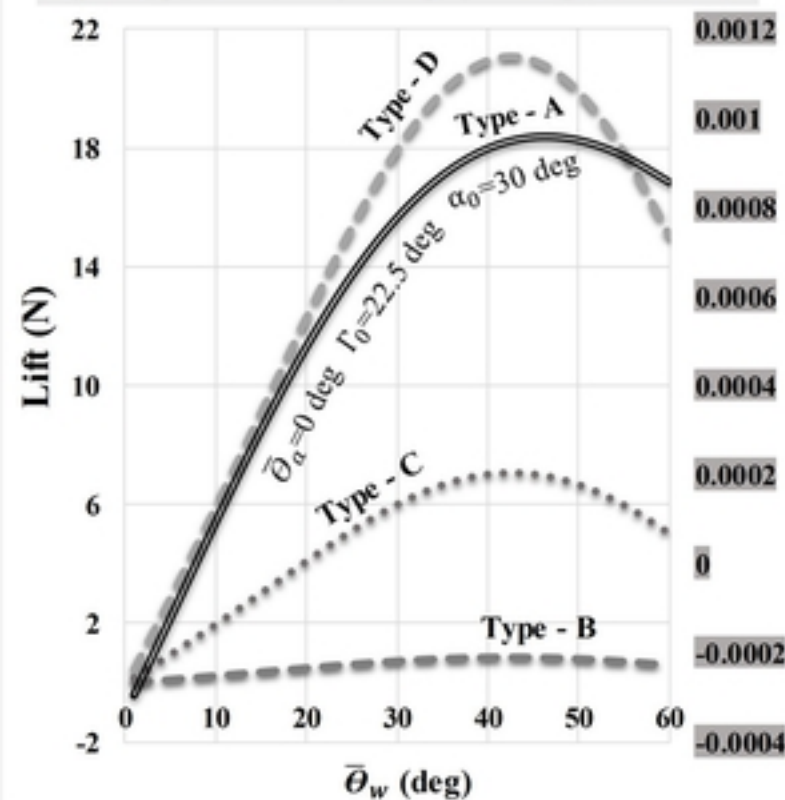

### Thrust vs $\bar{\theta}_w$ (deg)

$\bar{\theta}_\alpha=0$  deg,  $f=1$  Hz,  $\alpha_0=1$  deg  $\Gamma_0=60$  deg,  $U=0.05$  m/s

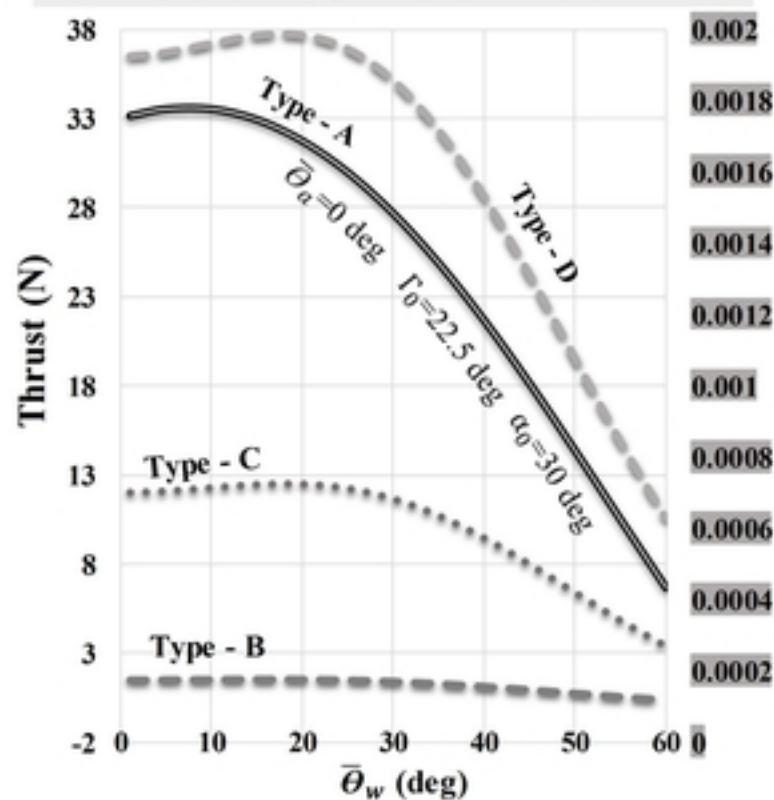

### Required Power vs $\bar{\theta}_w$ (deg)

$\bar{\theta}_\alpha=0$  deg,  $\Gamma_0=60$  deg,  $f=1$  Hz,  $\alpha_0=1$  deg,  $U=0.05$  m/s

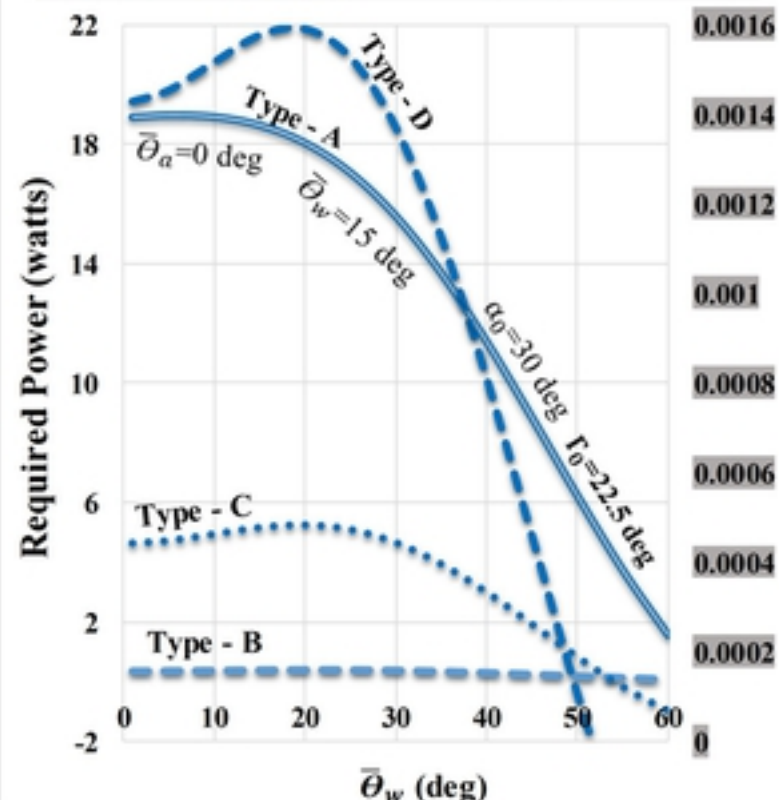

**Lift vs Dynamic twist angle  $\beta$**

$\bar{\Theta}_a=0$  deg,  $\bar{\Theta}_w=20$  deg,  $f=1$  Hz,  $\alpha_0=1$  deg  
 $\Gamma_0=60$  deg,  $U=0.05$  m/s

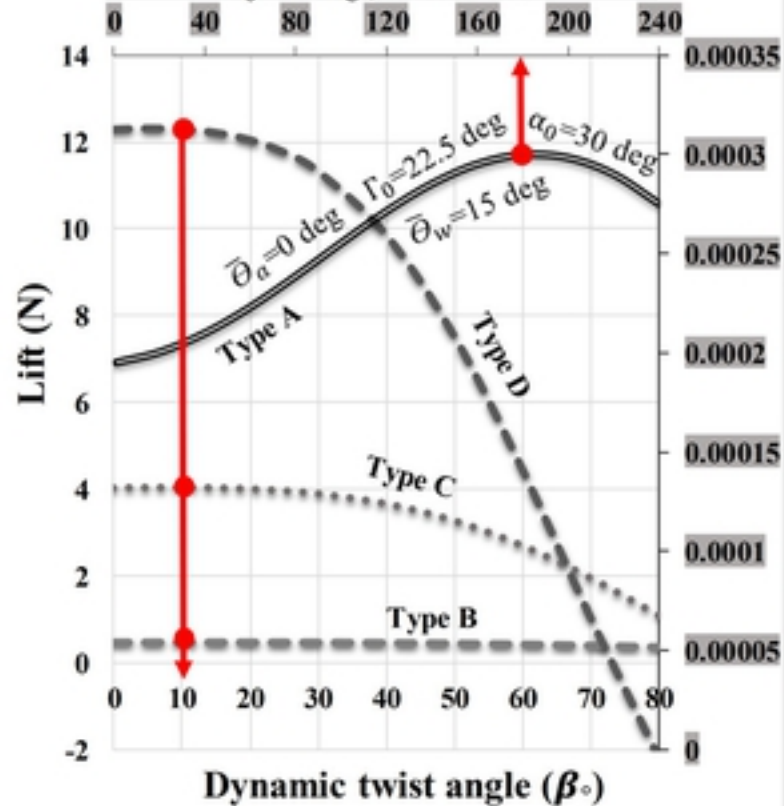

**Thrust vs Dynamic twist angle  $\beta$**

$\bar{\Theta}_a=0$  deg,  $\bar{\Theta}_w=20$  deg,  $f=1$  Hz,  $\alpha_0=1$  deg  
 $\Gamma_0=60$  deg,  $U=0.05$  m/s

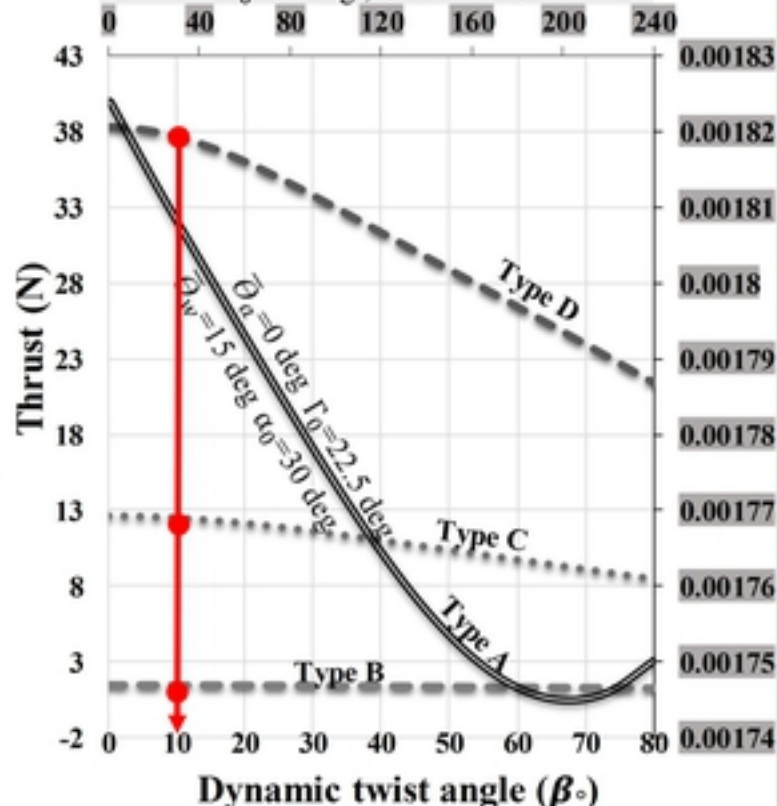

**Required Power vs  $\beta_0$  (deg)**

$\bar{\Theta}_a=0$  deg,  $\bar{\Theta}_w=20$  deg,  $\Gamma_0=60$  deg,  $f=1$  Hz,  $\alpha_0=1$  deg  
 $U=0.05$  m/s

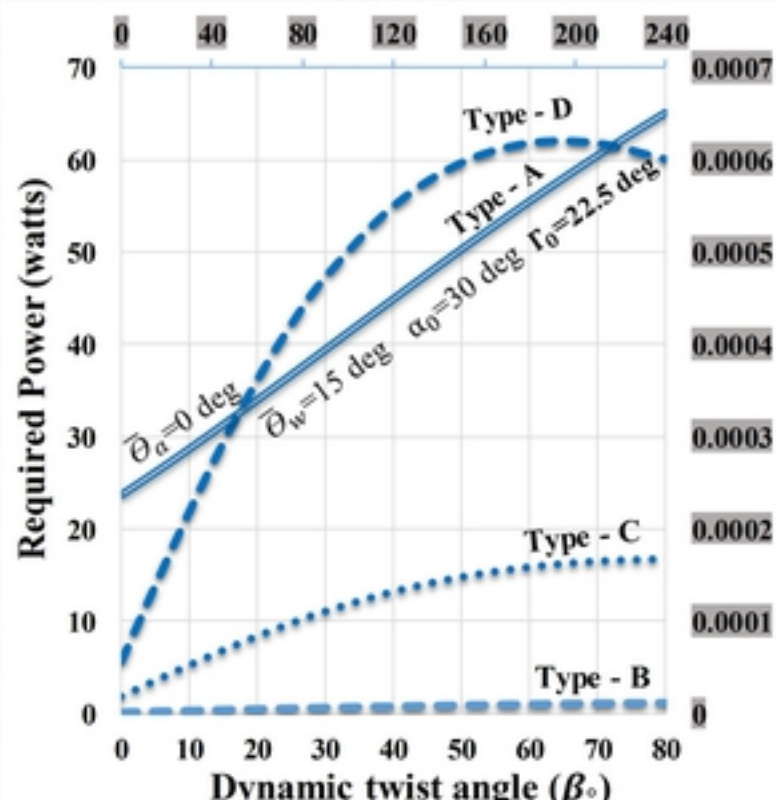



**Braking - Drag force (N)**

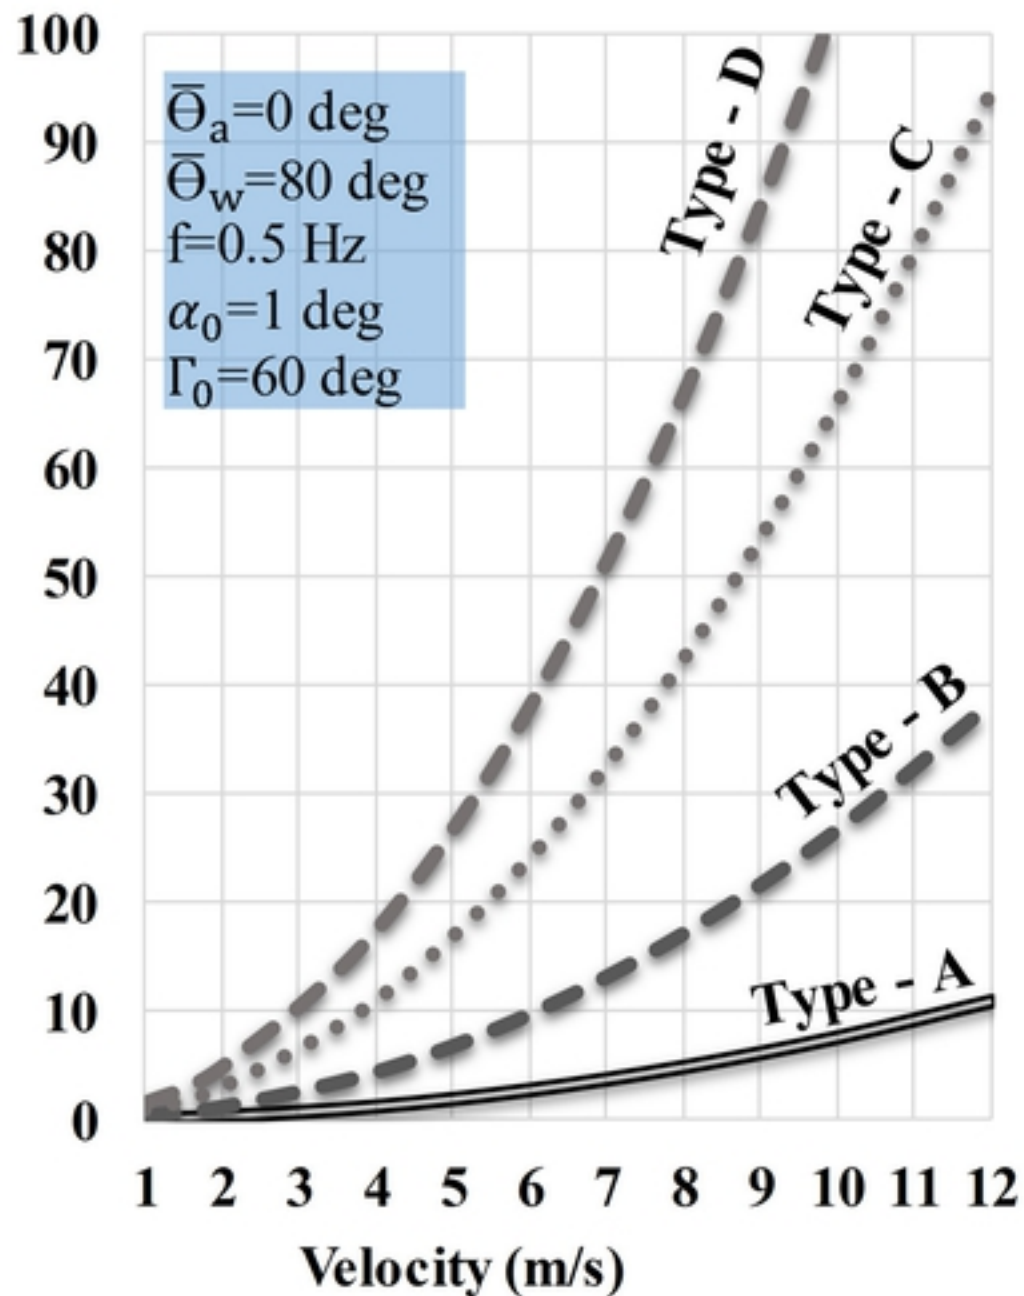

**Braking - Lift force (N)**

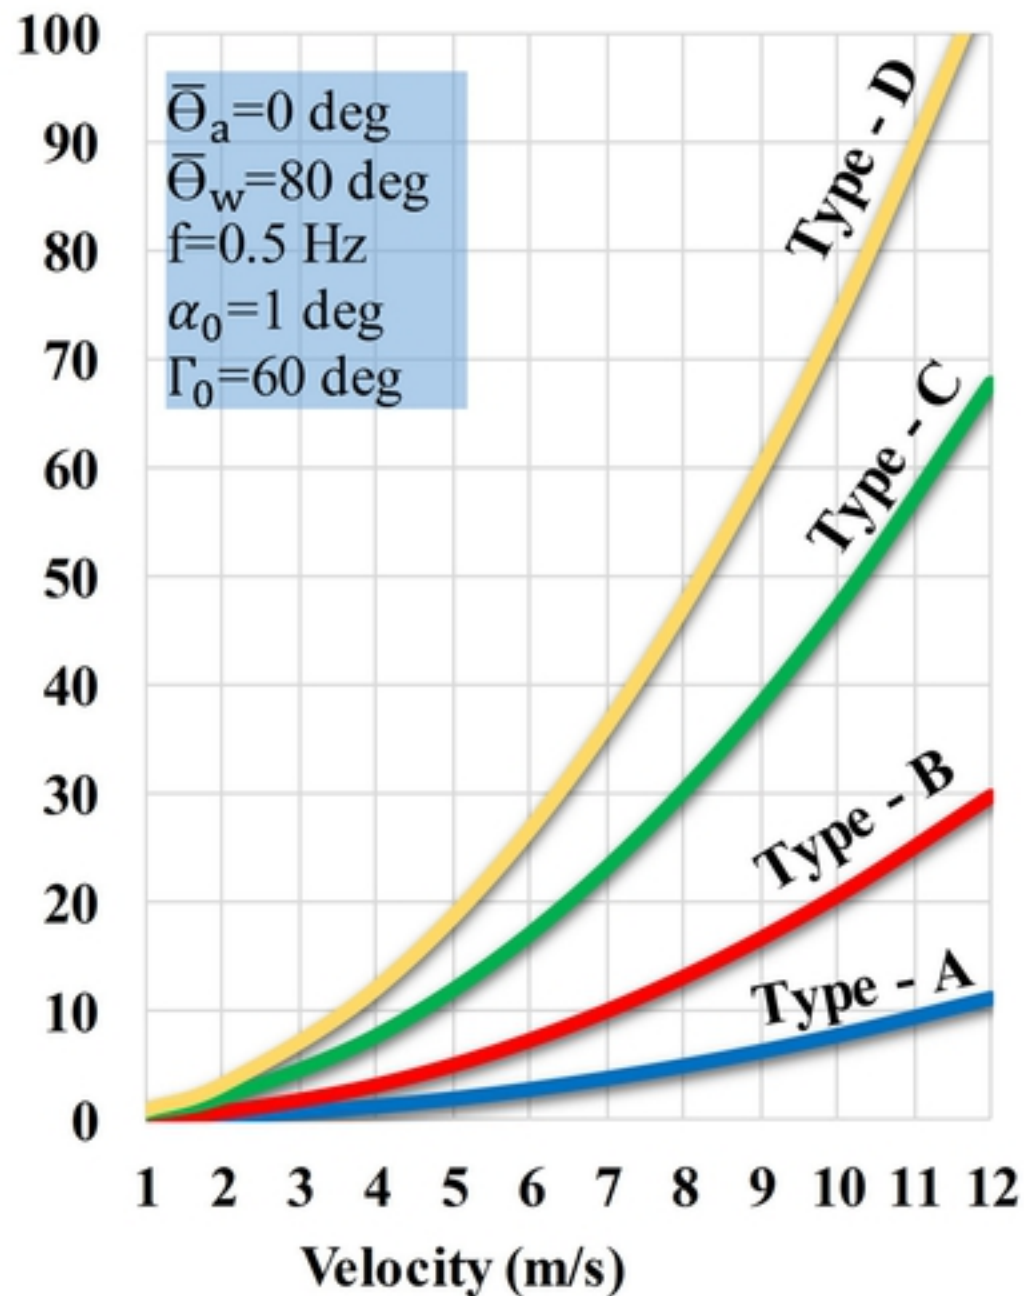

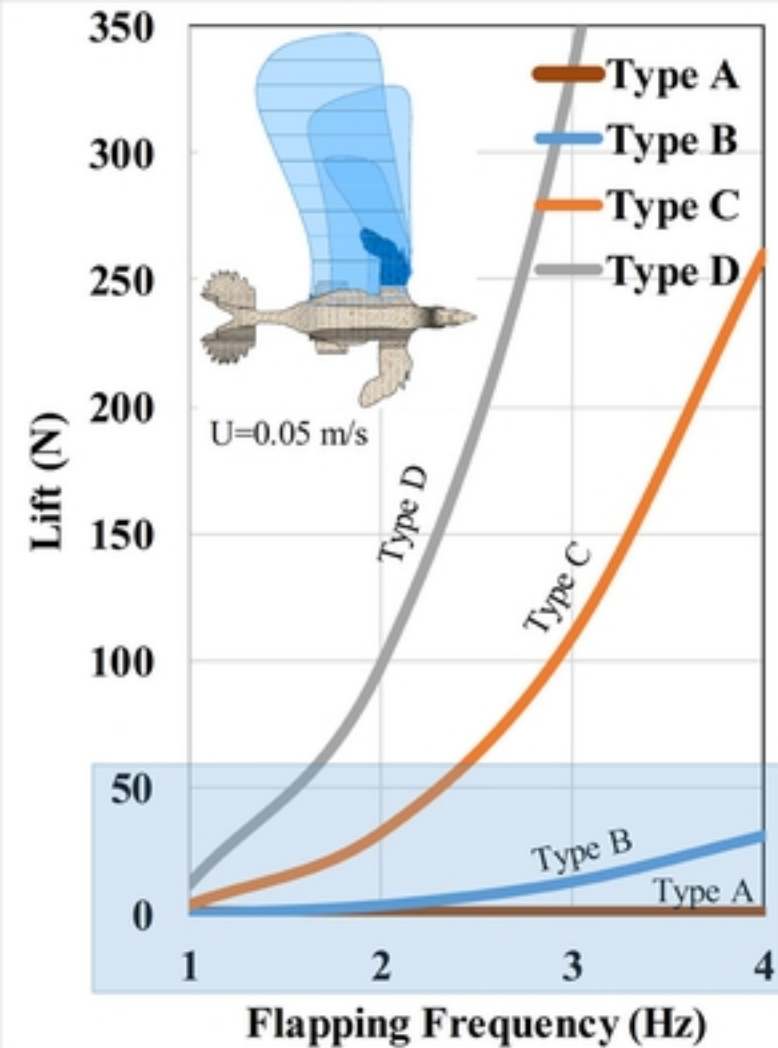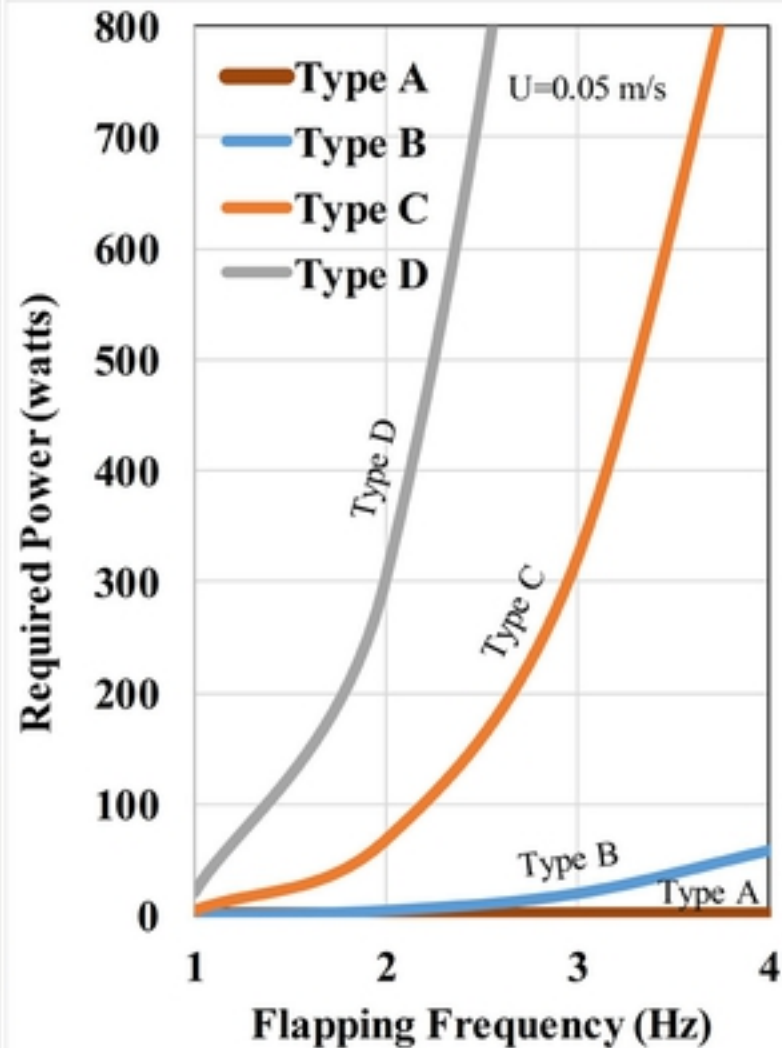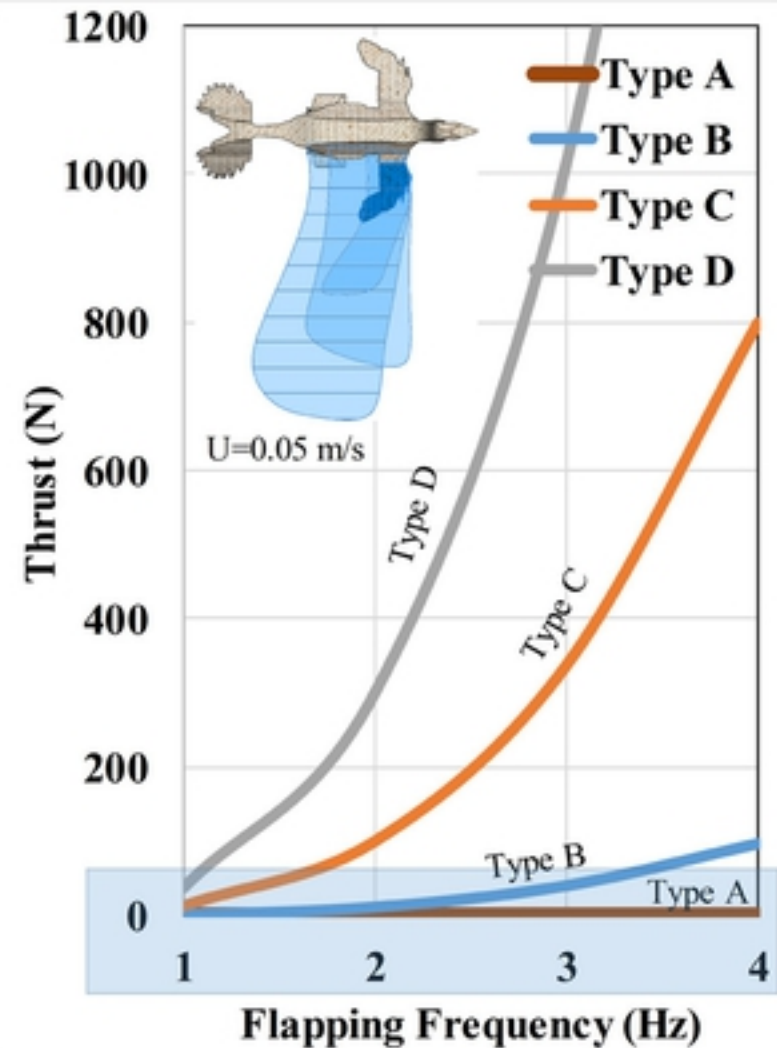

## Type - A

Lift Vs Velocity

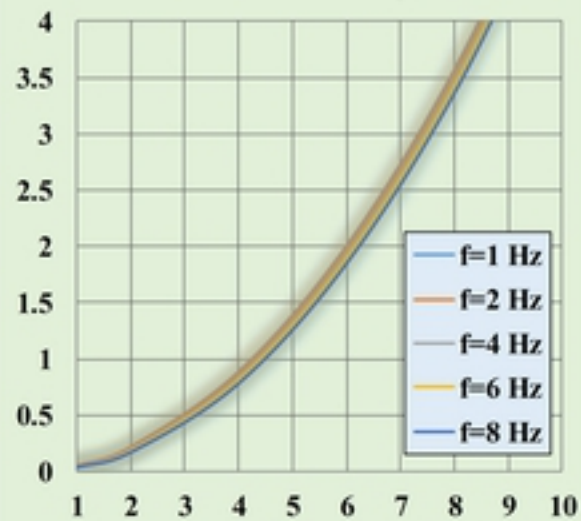

## Type - B

Lift Vs Velocity

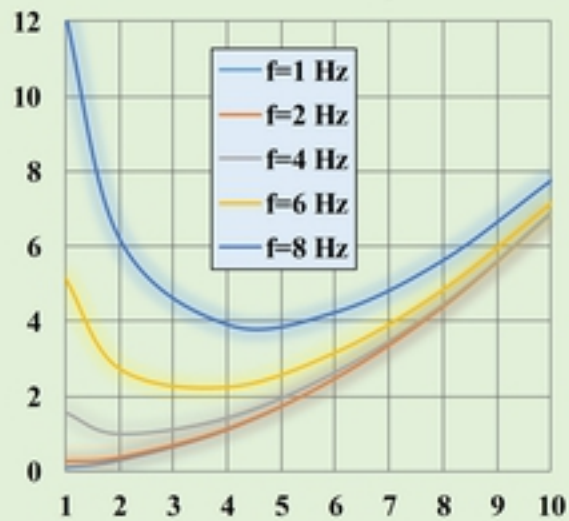

## Type - C

Lift Vs Velocity

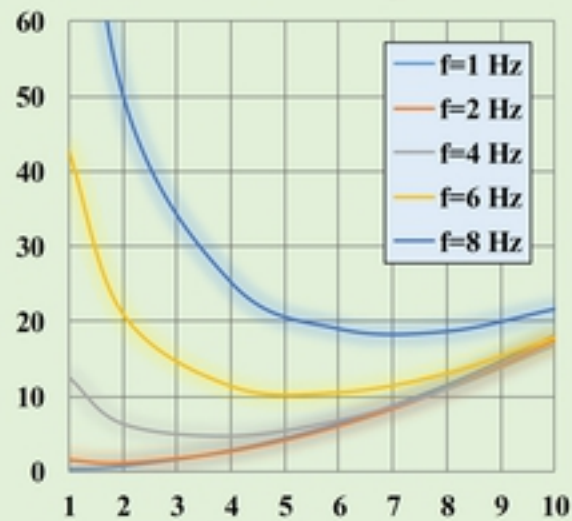

## Type - D

Lift Vs Velocity

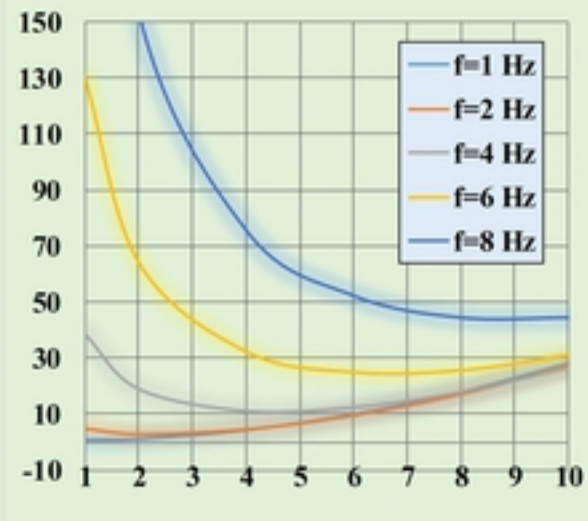

Thrust Vs Velocity

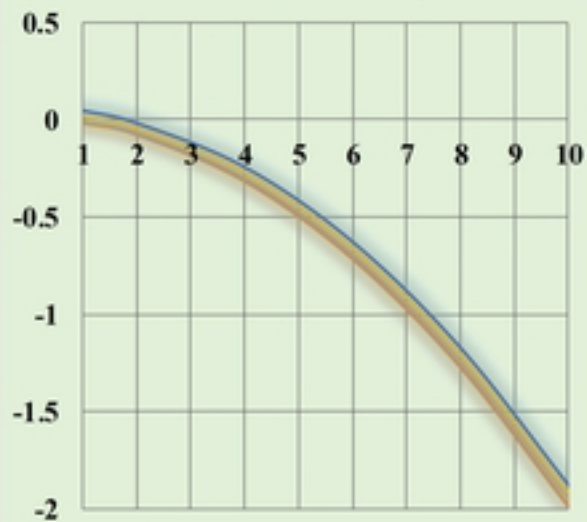

Thrust Vs Velocity

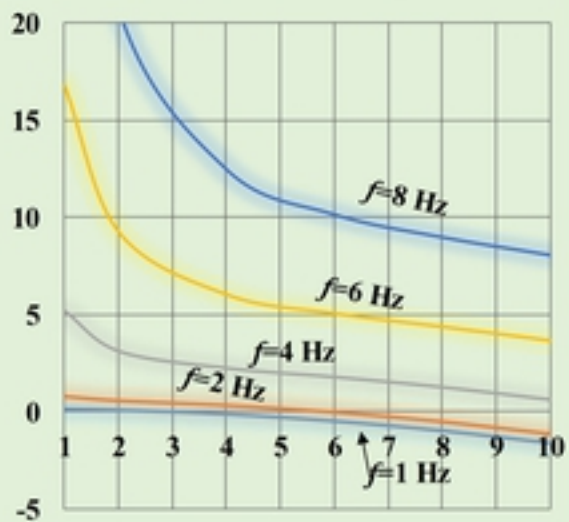

Thrust Vs Velocity

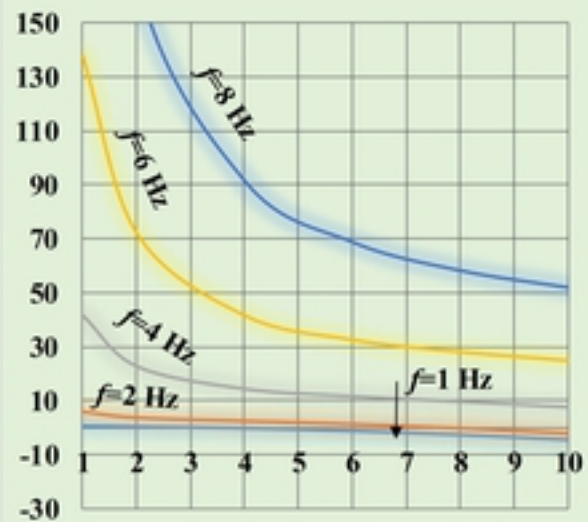

Thrust Vs Velocity

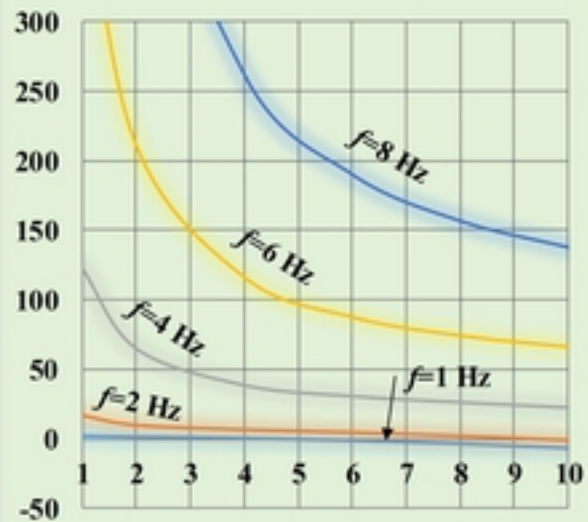

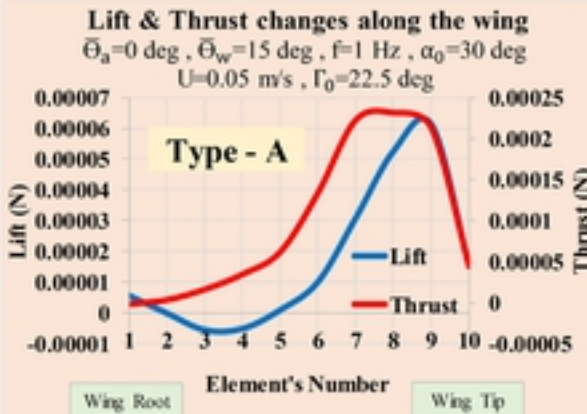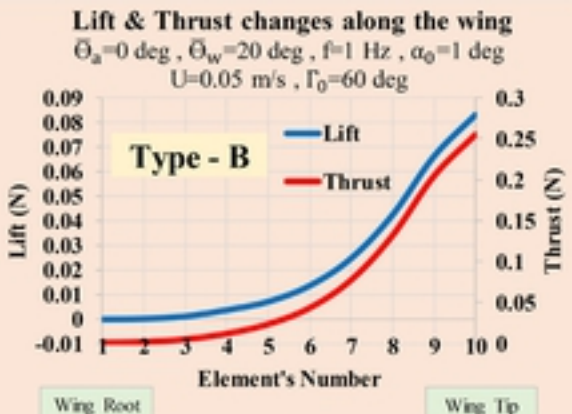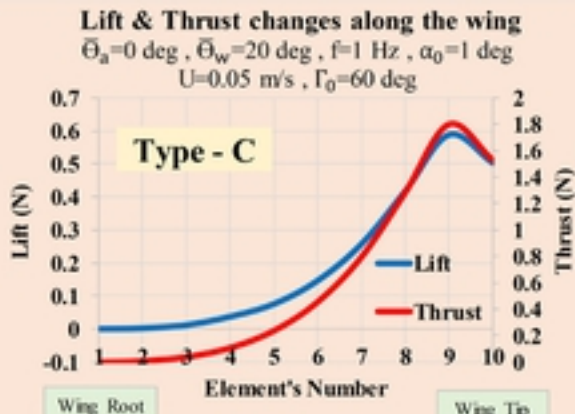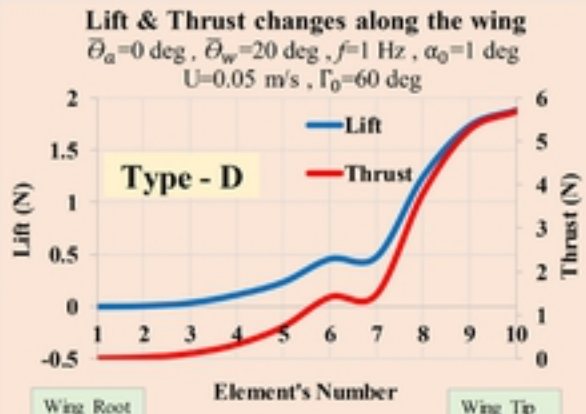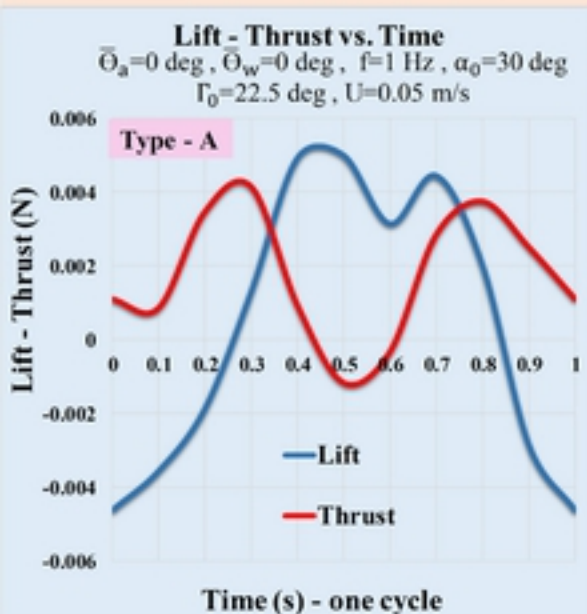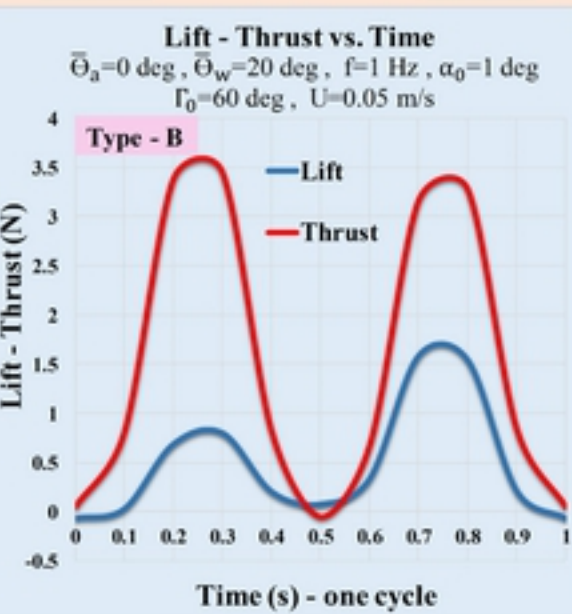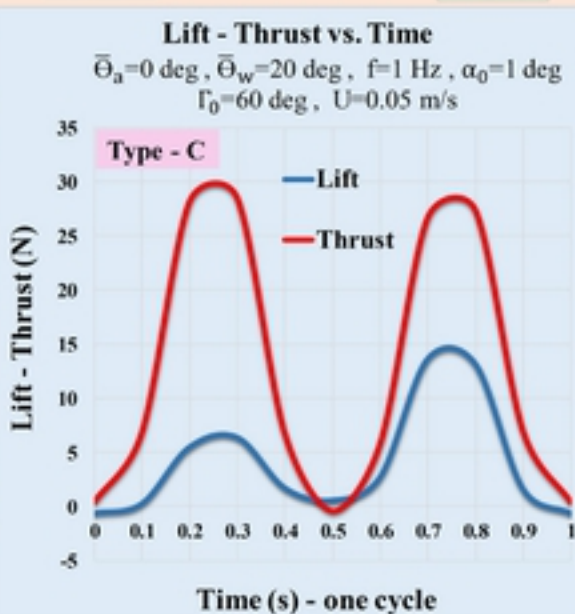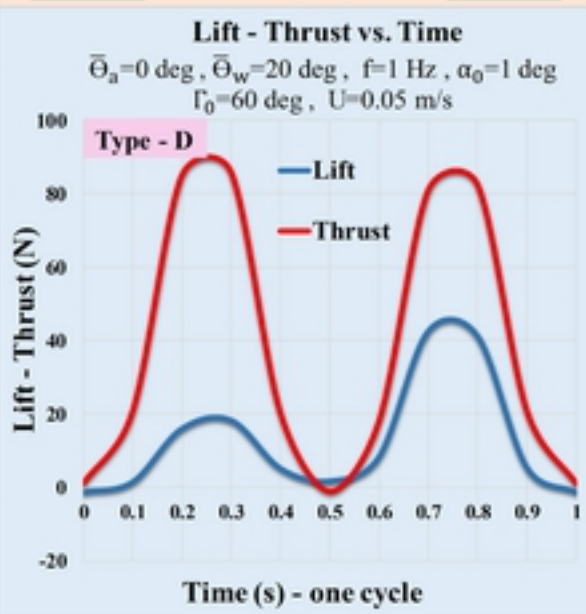

bioRxiv preprint doi: <https://doi.org/10.1101/393686>; this version posted August 16, 2018. The copyright holder for this preprint (which was not certified by peer review) is the author/funder, who has granted bioRxiv a license to display the preprint in perpetuity. It is made available under aCC-BY 4.0 International license.

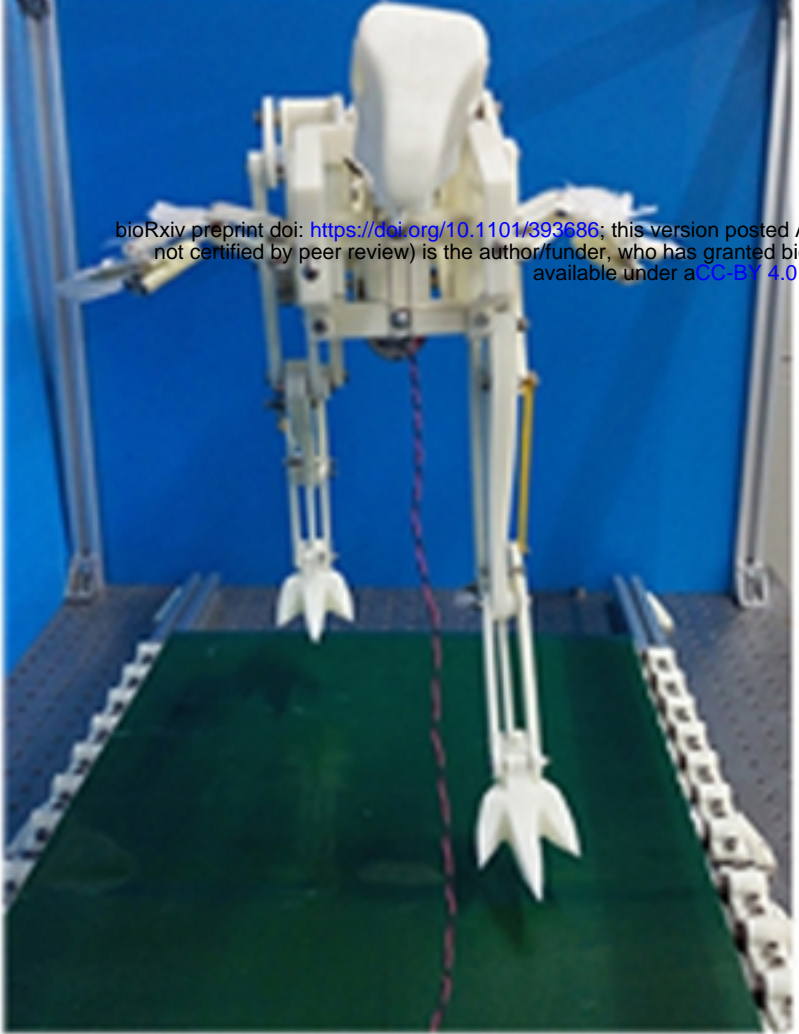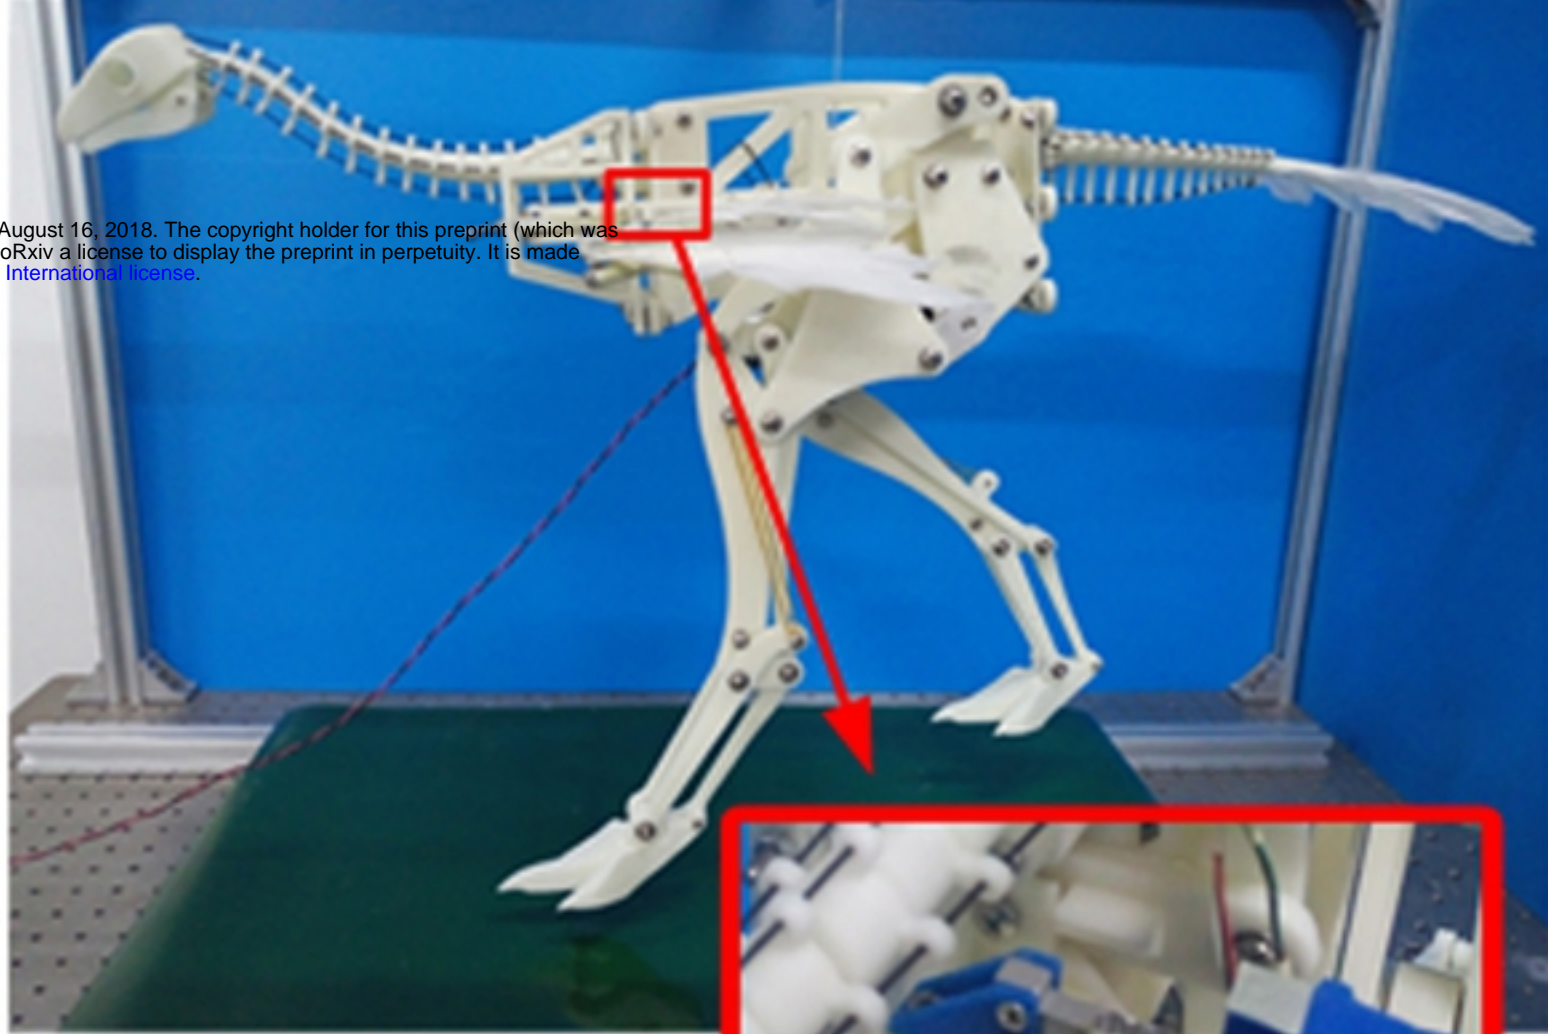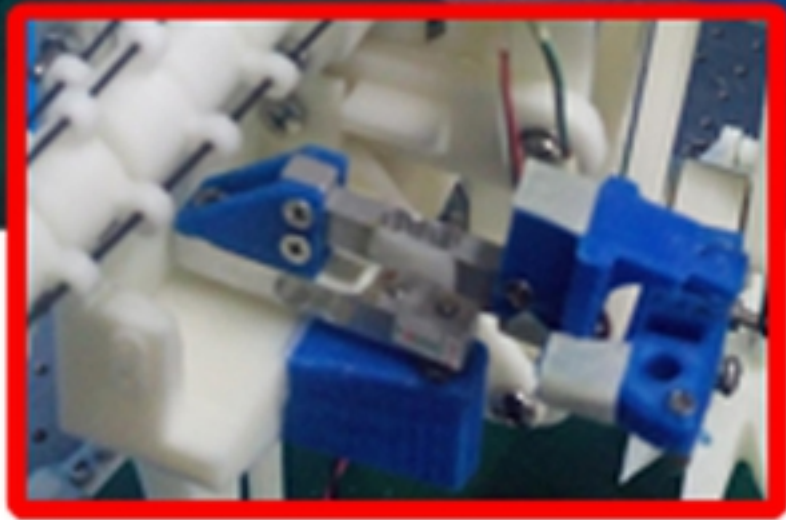

# Force sensors in vertical and horizontal directions

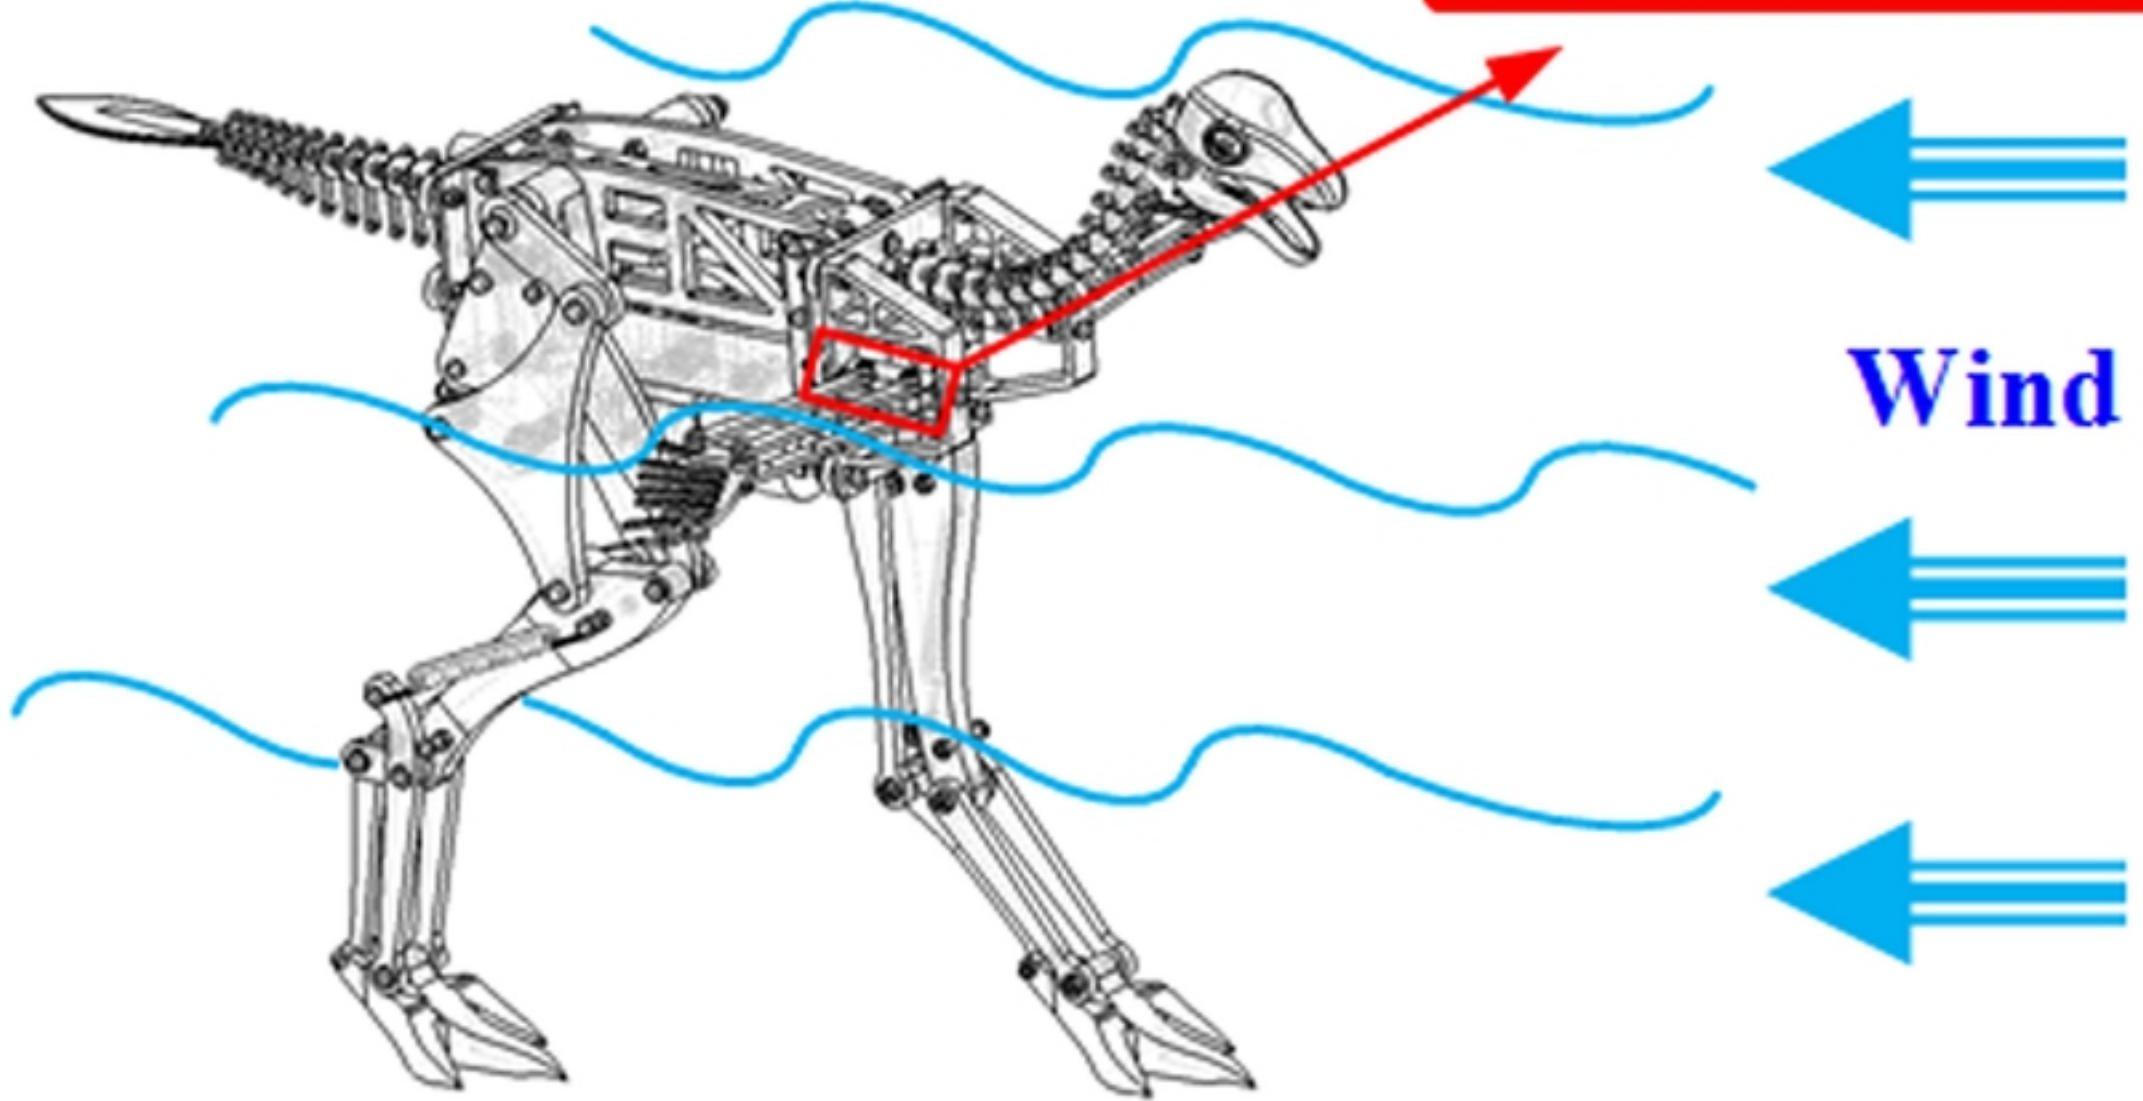

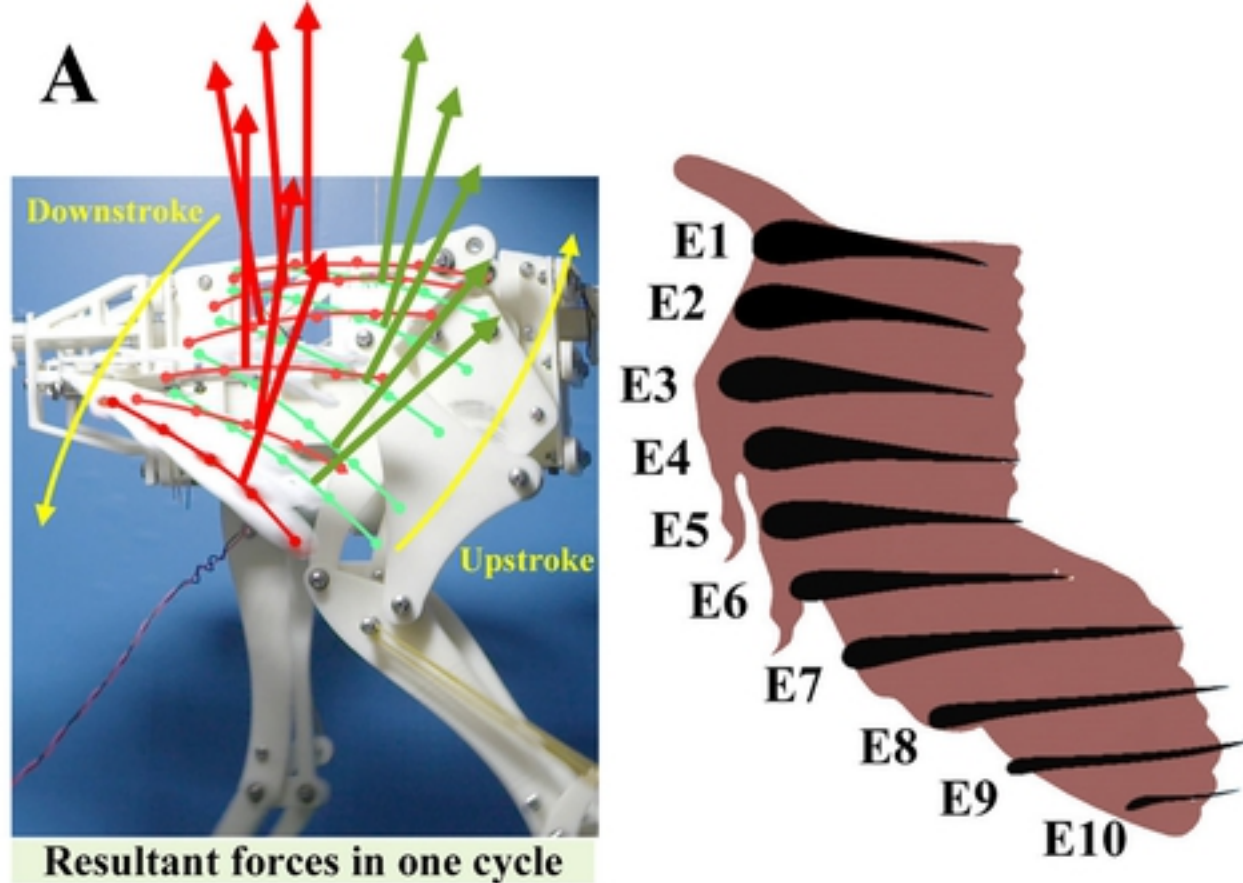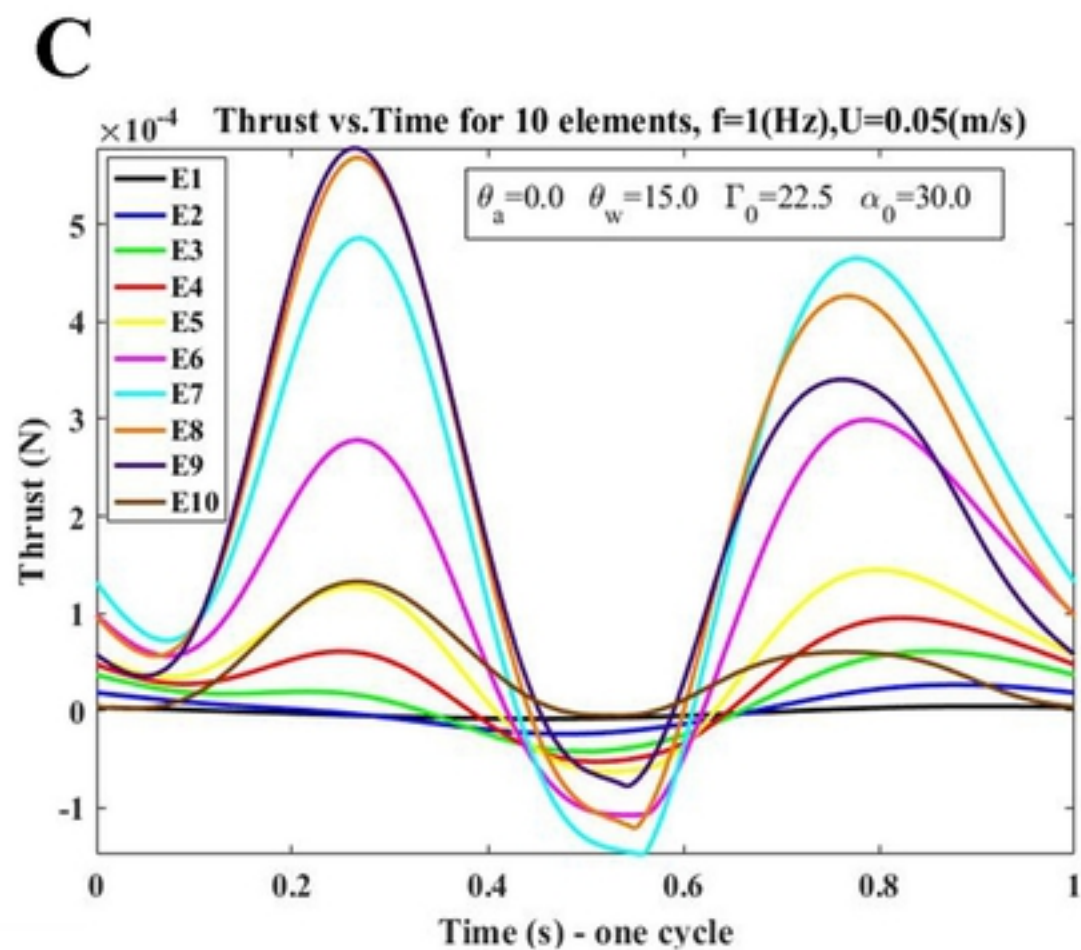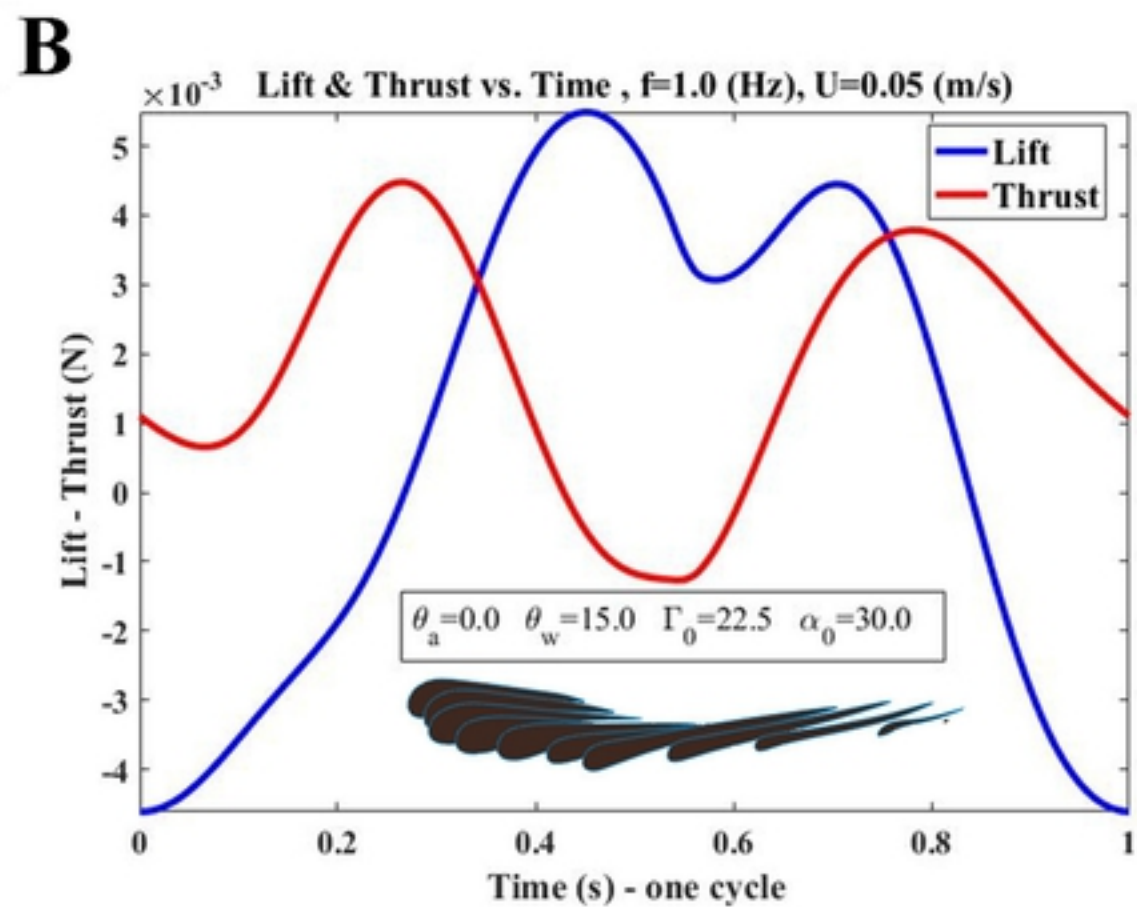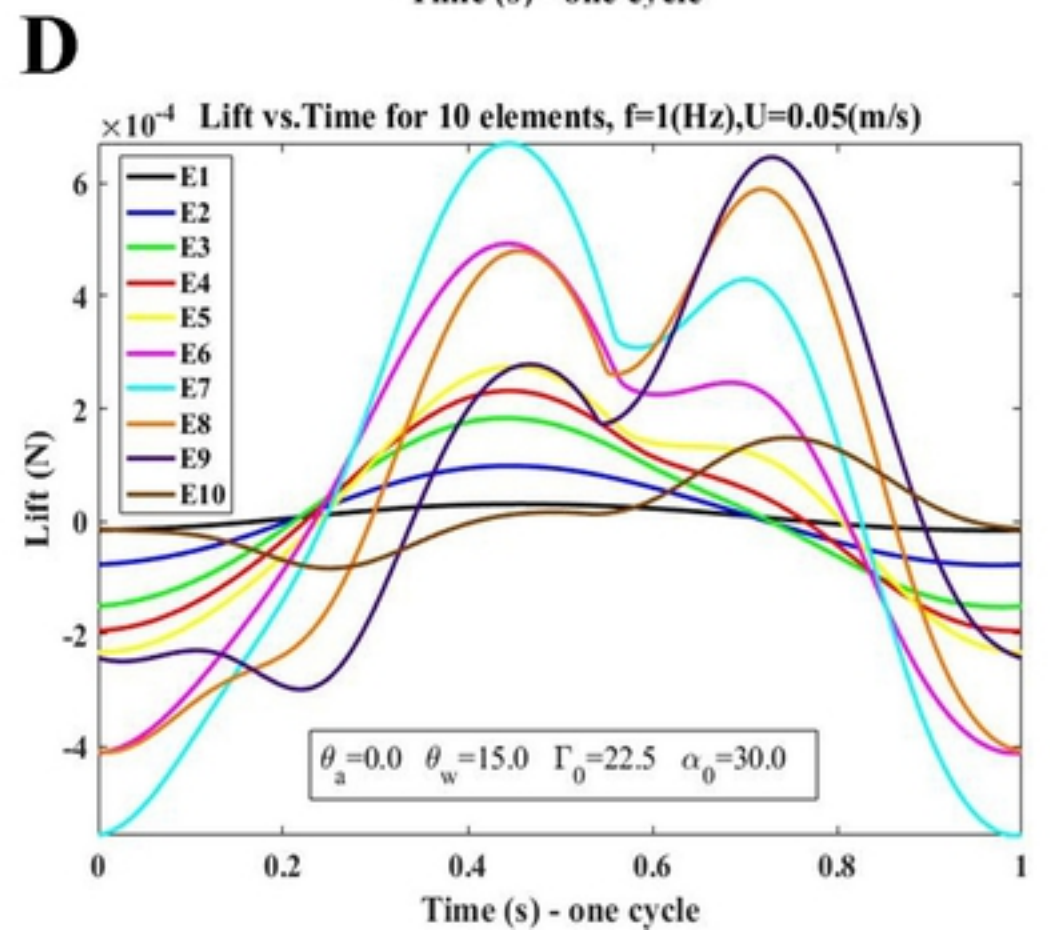

## Comparison of each element along the wingspan

$\bar{\theta}_a = 0$  deg,  $\bar{\theta}_w = 15$  deg,  $f = 1$  Hz,  $\alpha_0 = 30$  deg,  $U = 0.05$  m/s,  $\Gamma_0 = 22.5$  deg

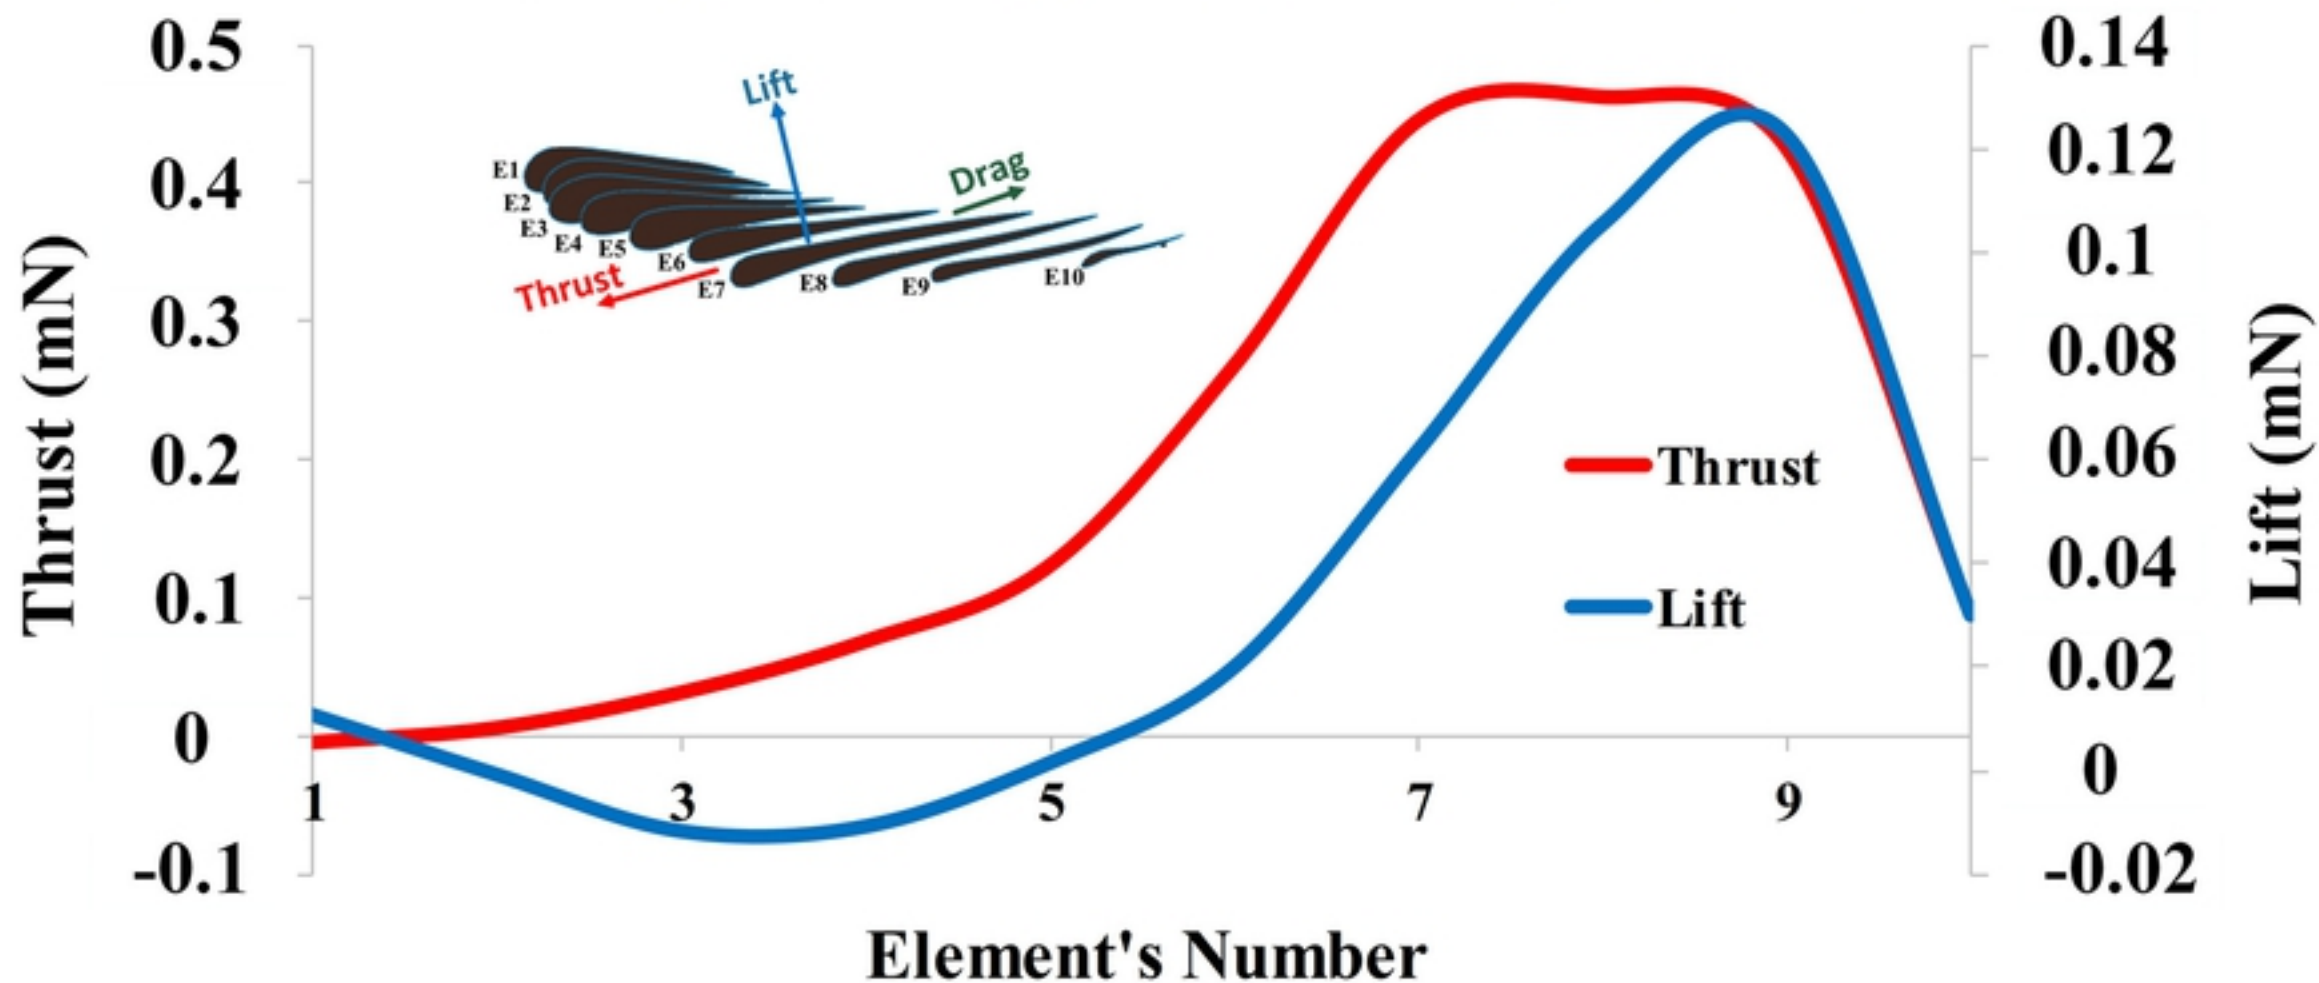





**A**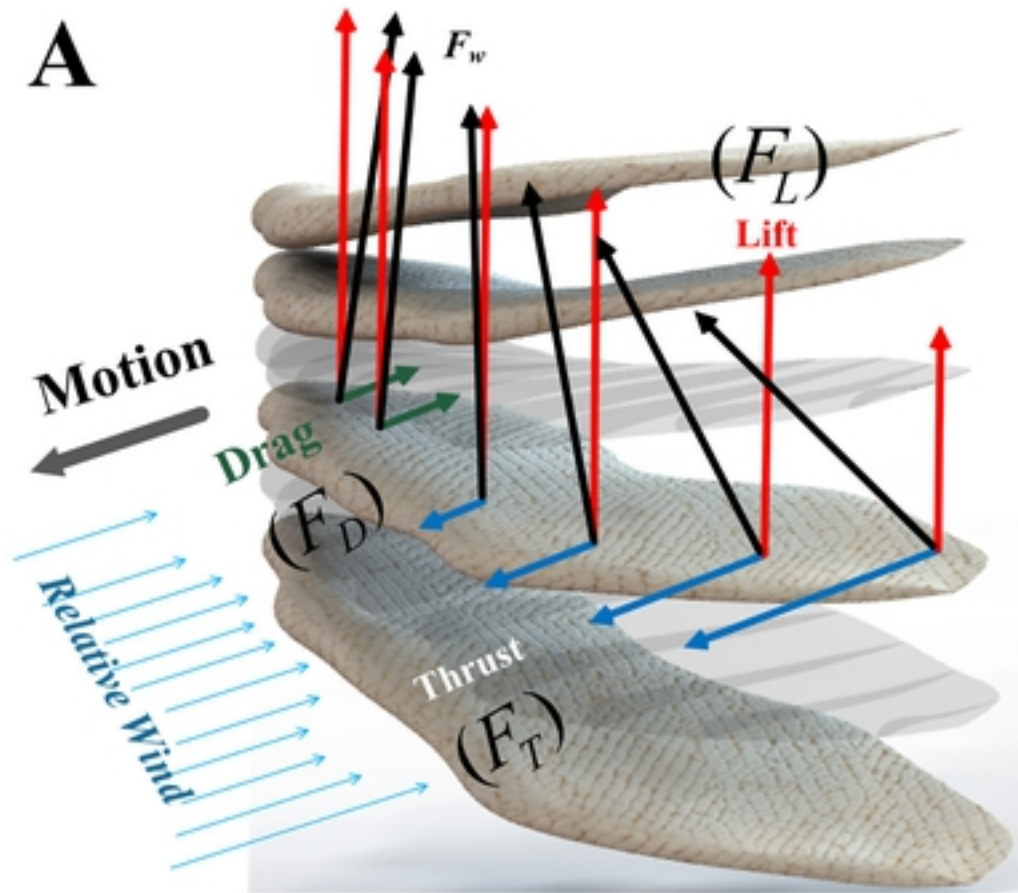**B**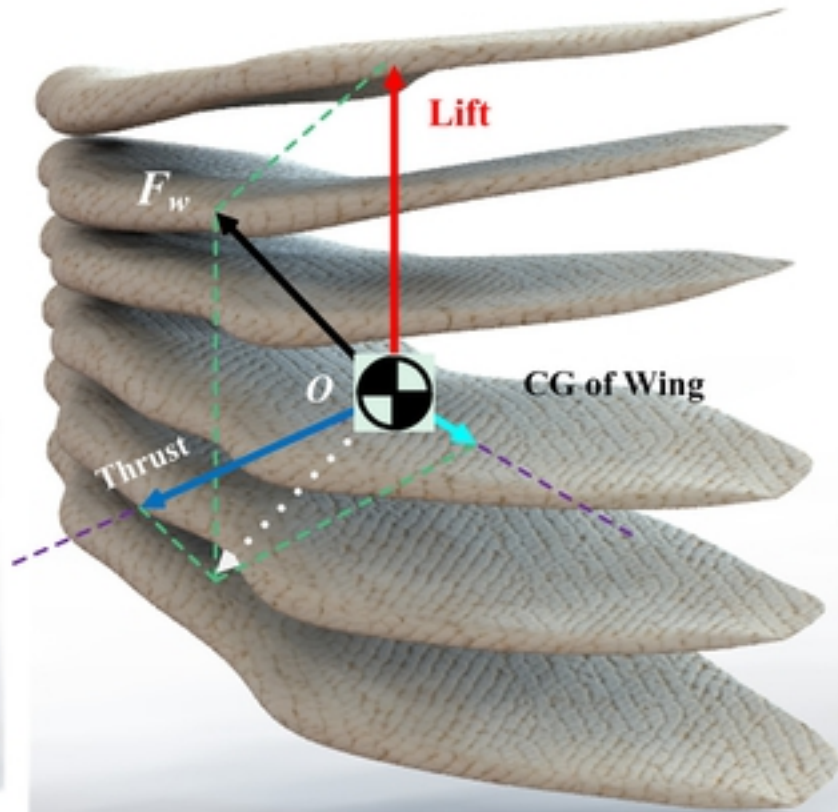**C**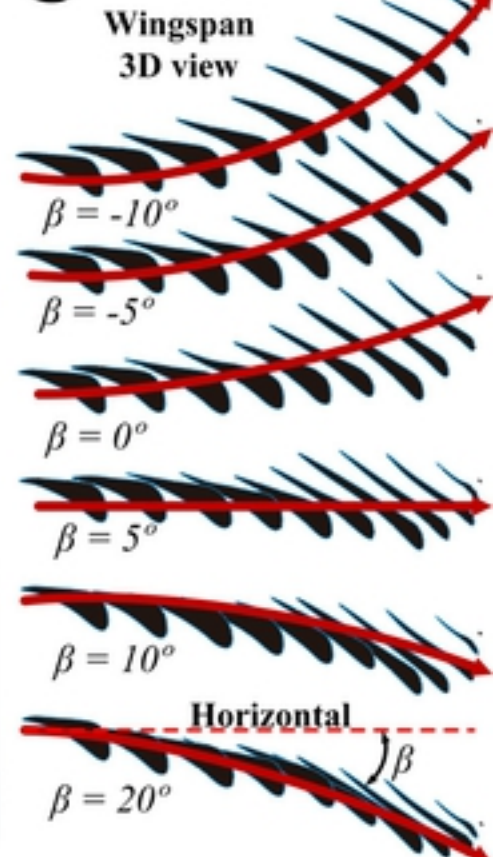

**A**

V (m/s)

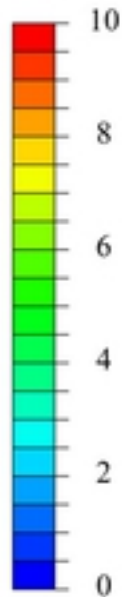

Posterior view

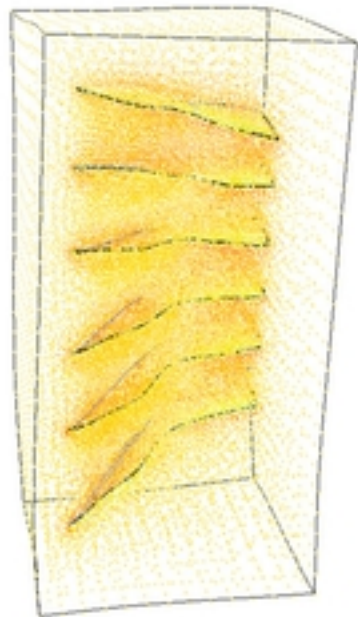

Anterior view

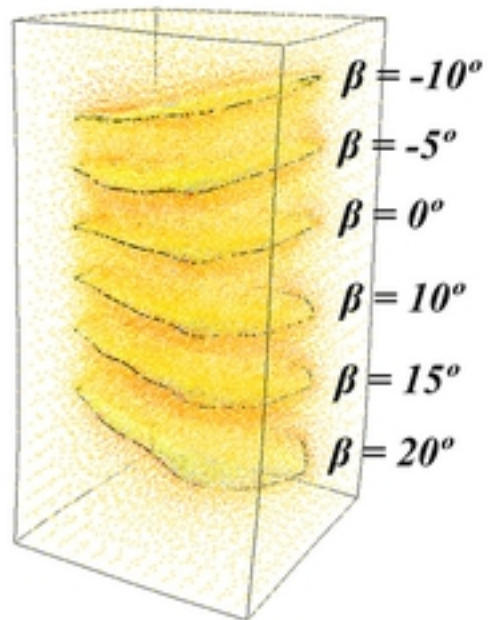**B**

U (mm)

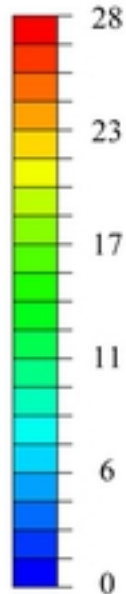

Posterior view

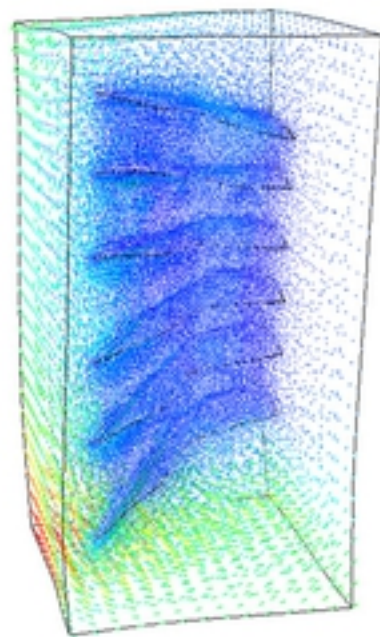

Anterior view

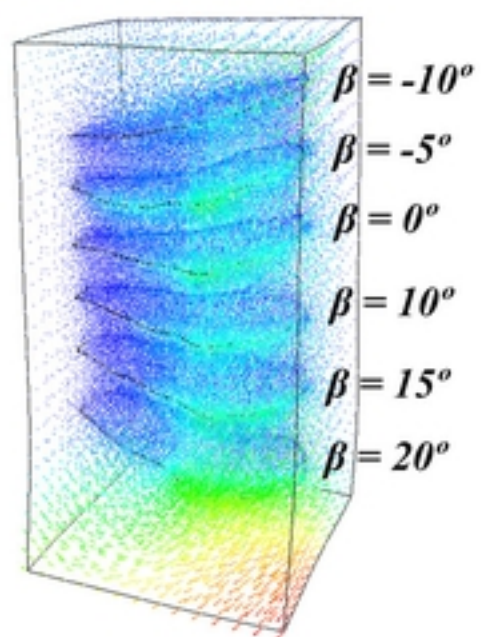

**Upper Surface**

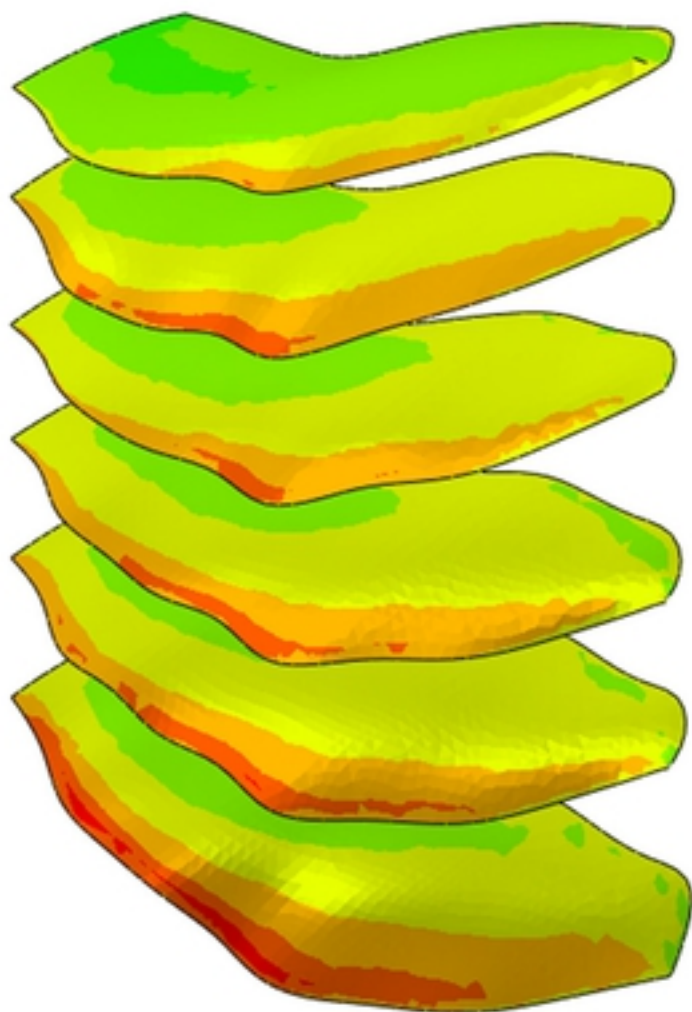

**Lower Surface**

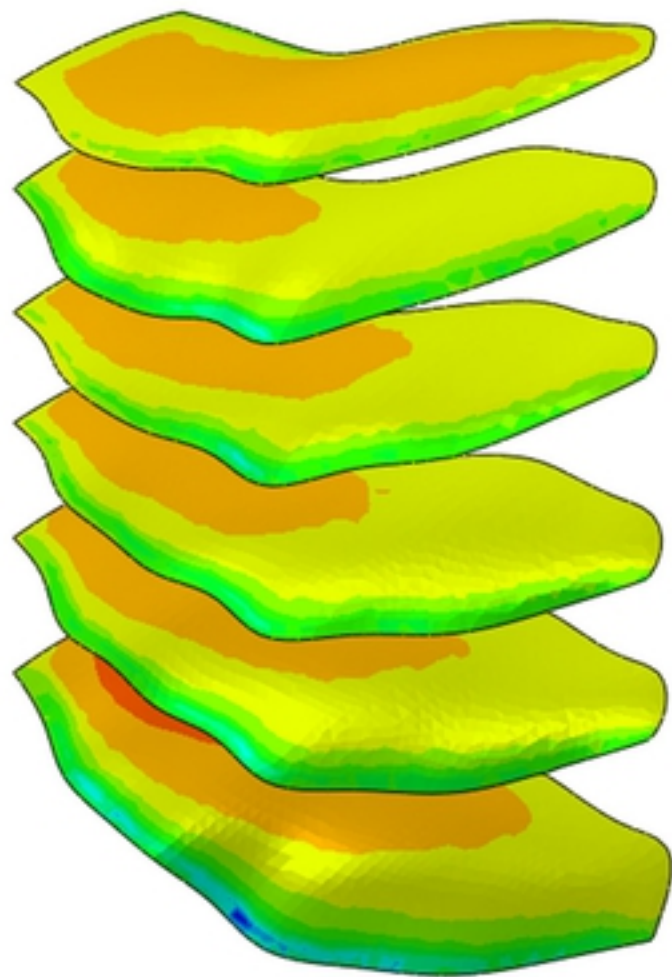

$\beta = -10^\circ$

$\beta = -5^\circ$

$\beta = 0^\circ$

$\beta = 10^\circ$

$\beta = 15^\circ$

$\beta = 20^\circ$

**Pressure (Pascals)**

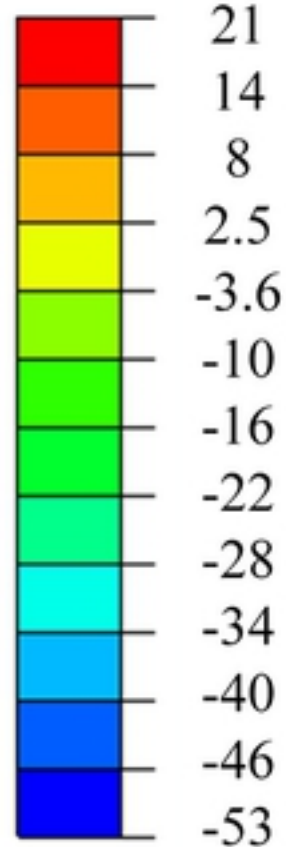

**A**  $U_{\text{wing}}$  (mm)

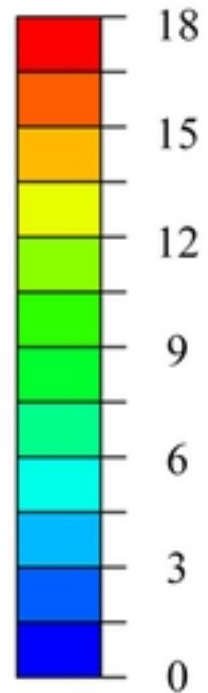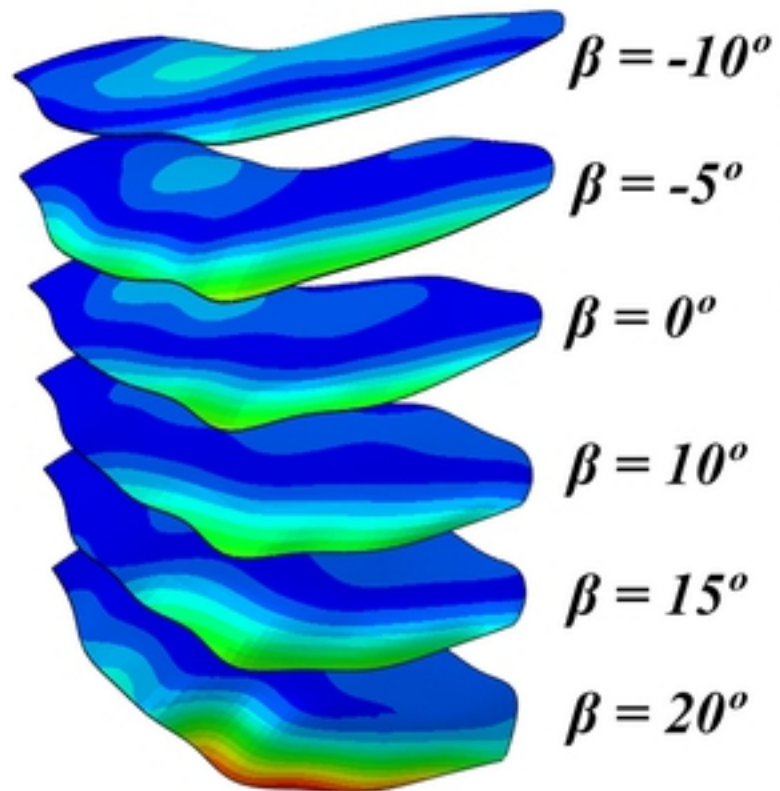

**B**

Stress (kpa)

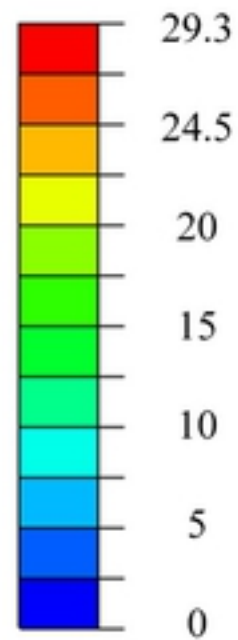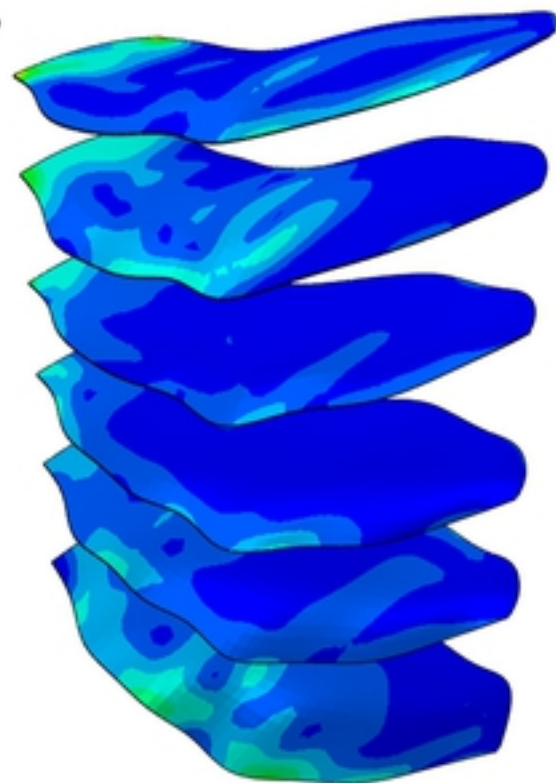

**A**Reaction  
forcesReaction  
Moments $\beta = -10^\circ$ 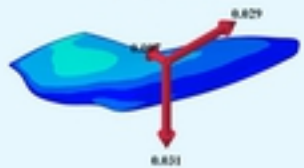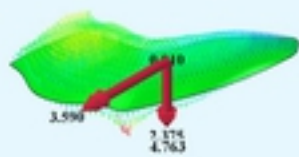 $\beta = -5^\circ$ 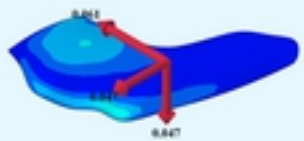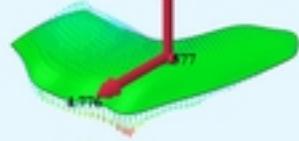 $\beta = 0^\circ$ 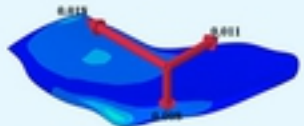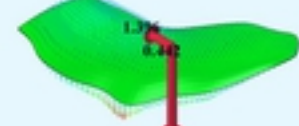 $\beta = 10^\circ$ 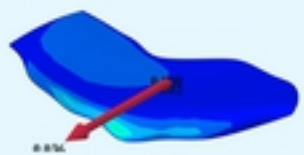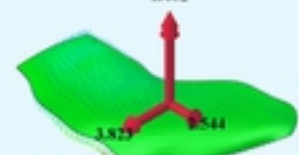 $\beta = 15^\circ$ 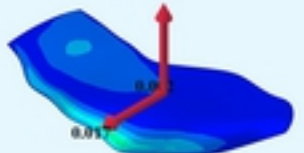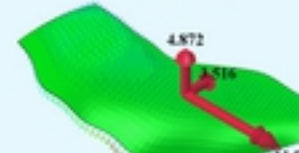 $\beta = 20^\circ$ 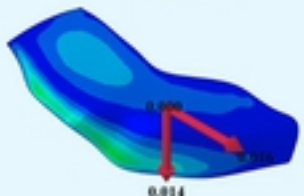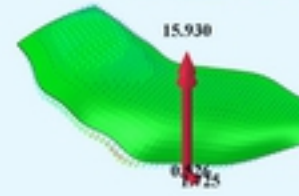**B**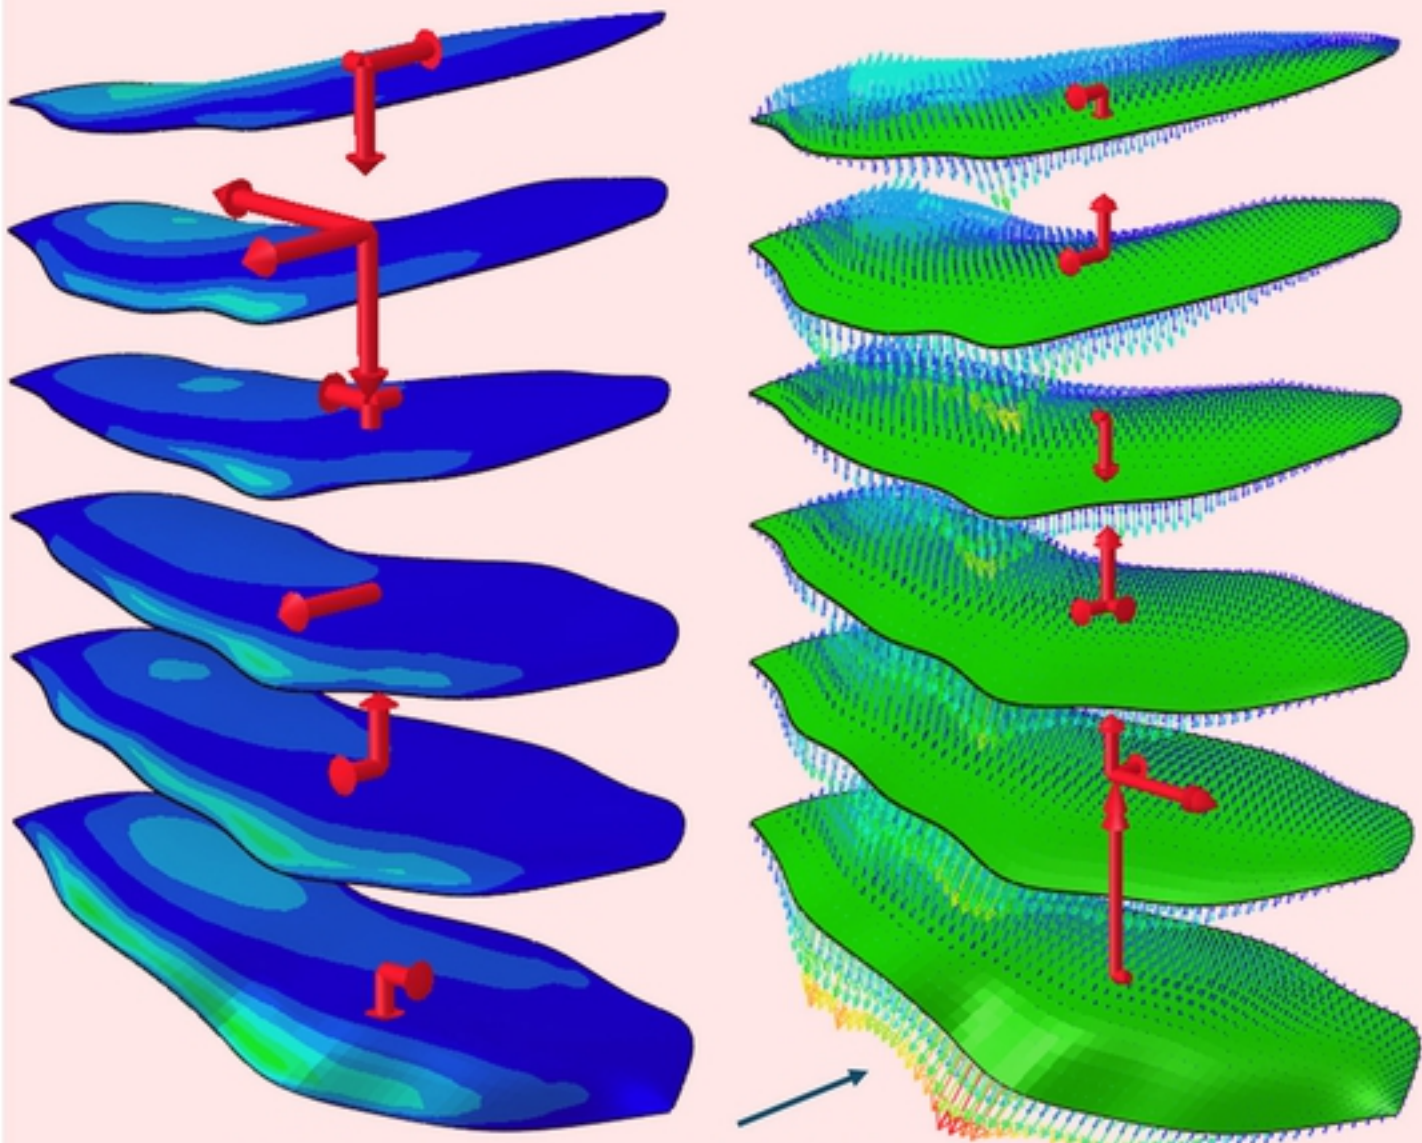

Point loads at any nodes and related vectors

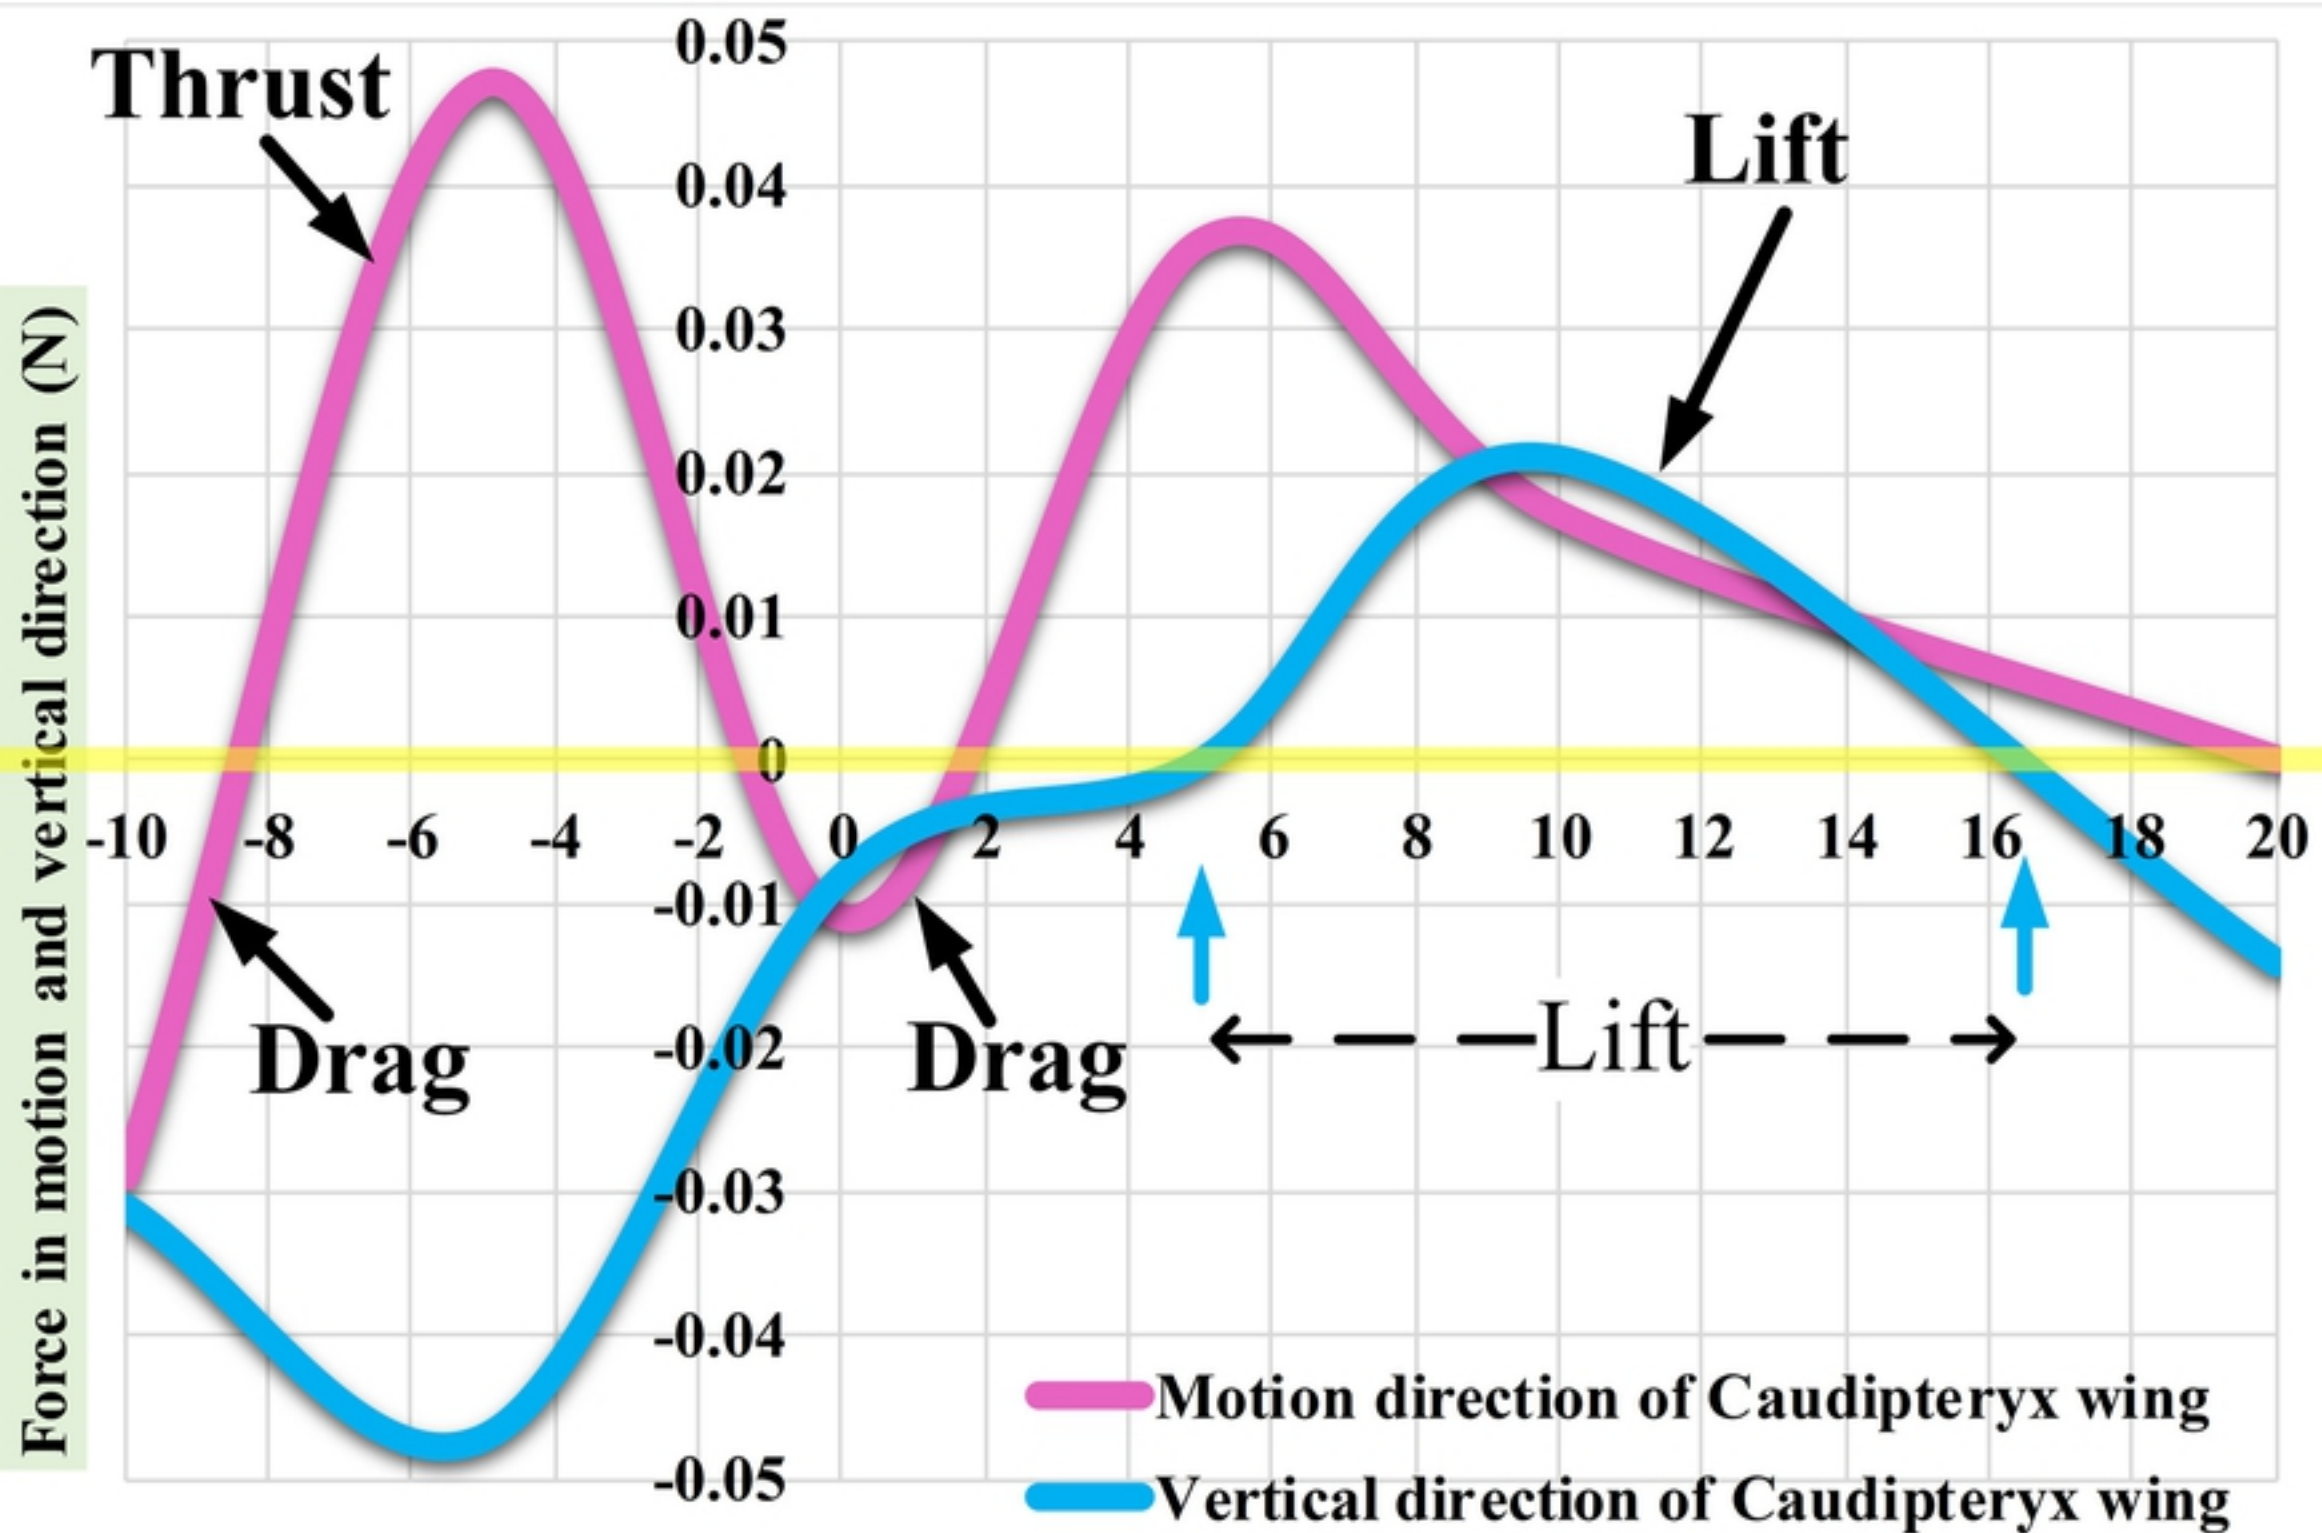

**Flapping Angle - wing motion in downstroke direction**

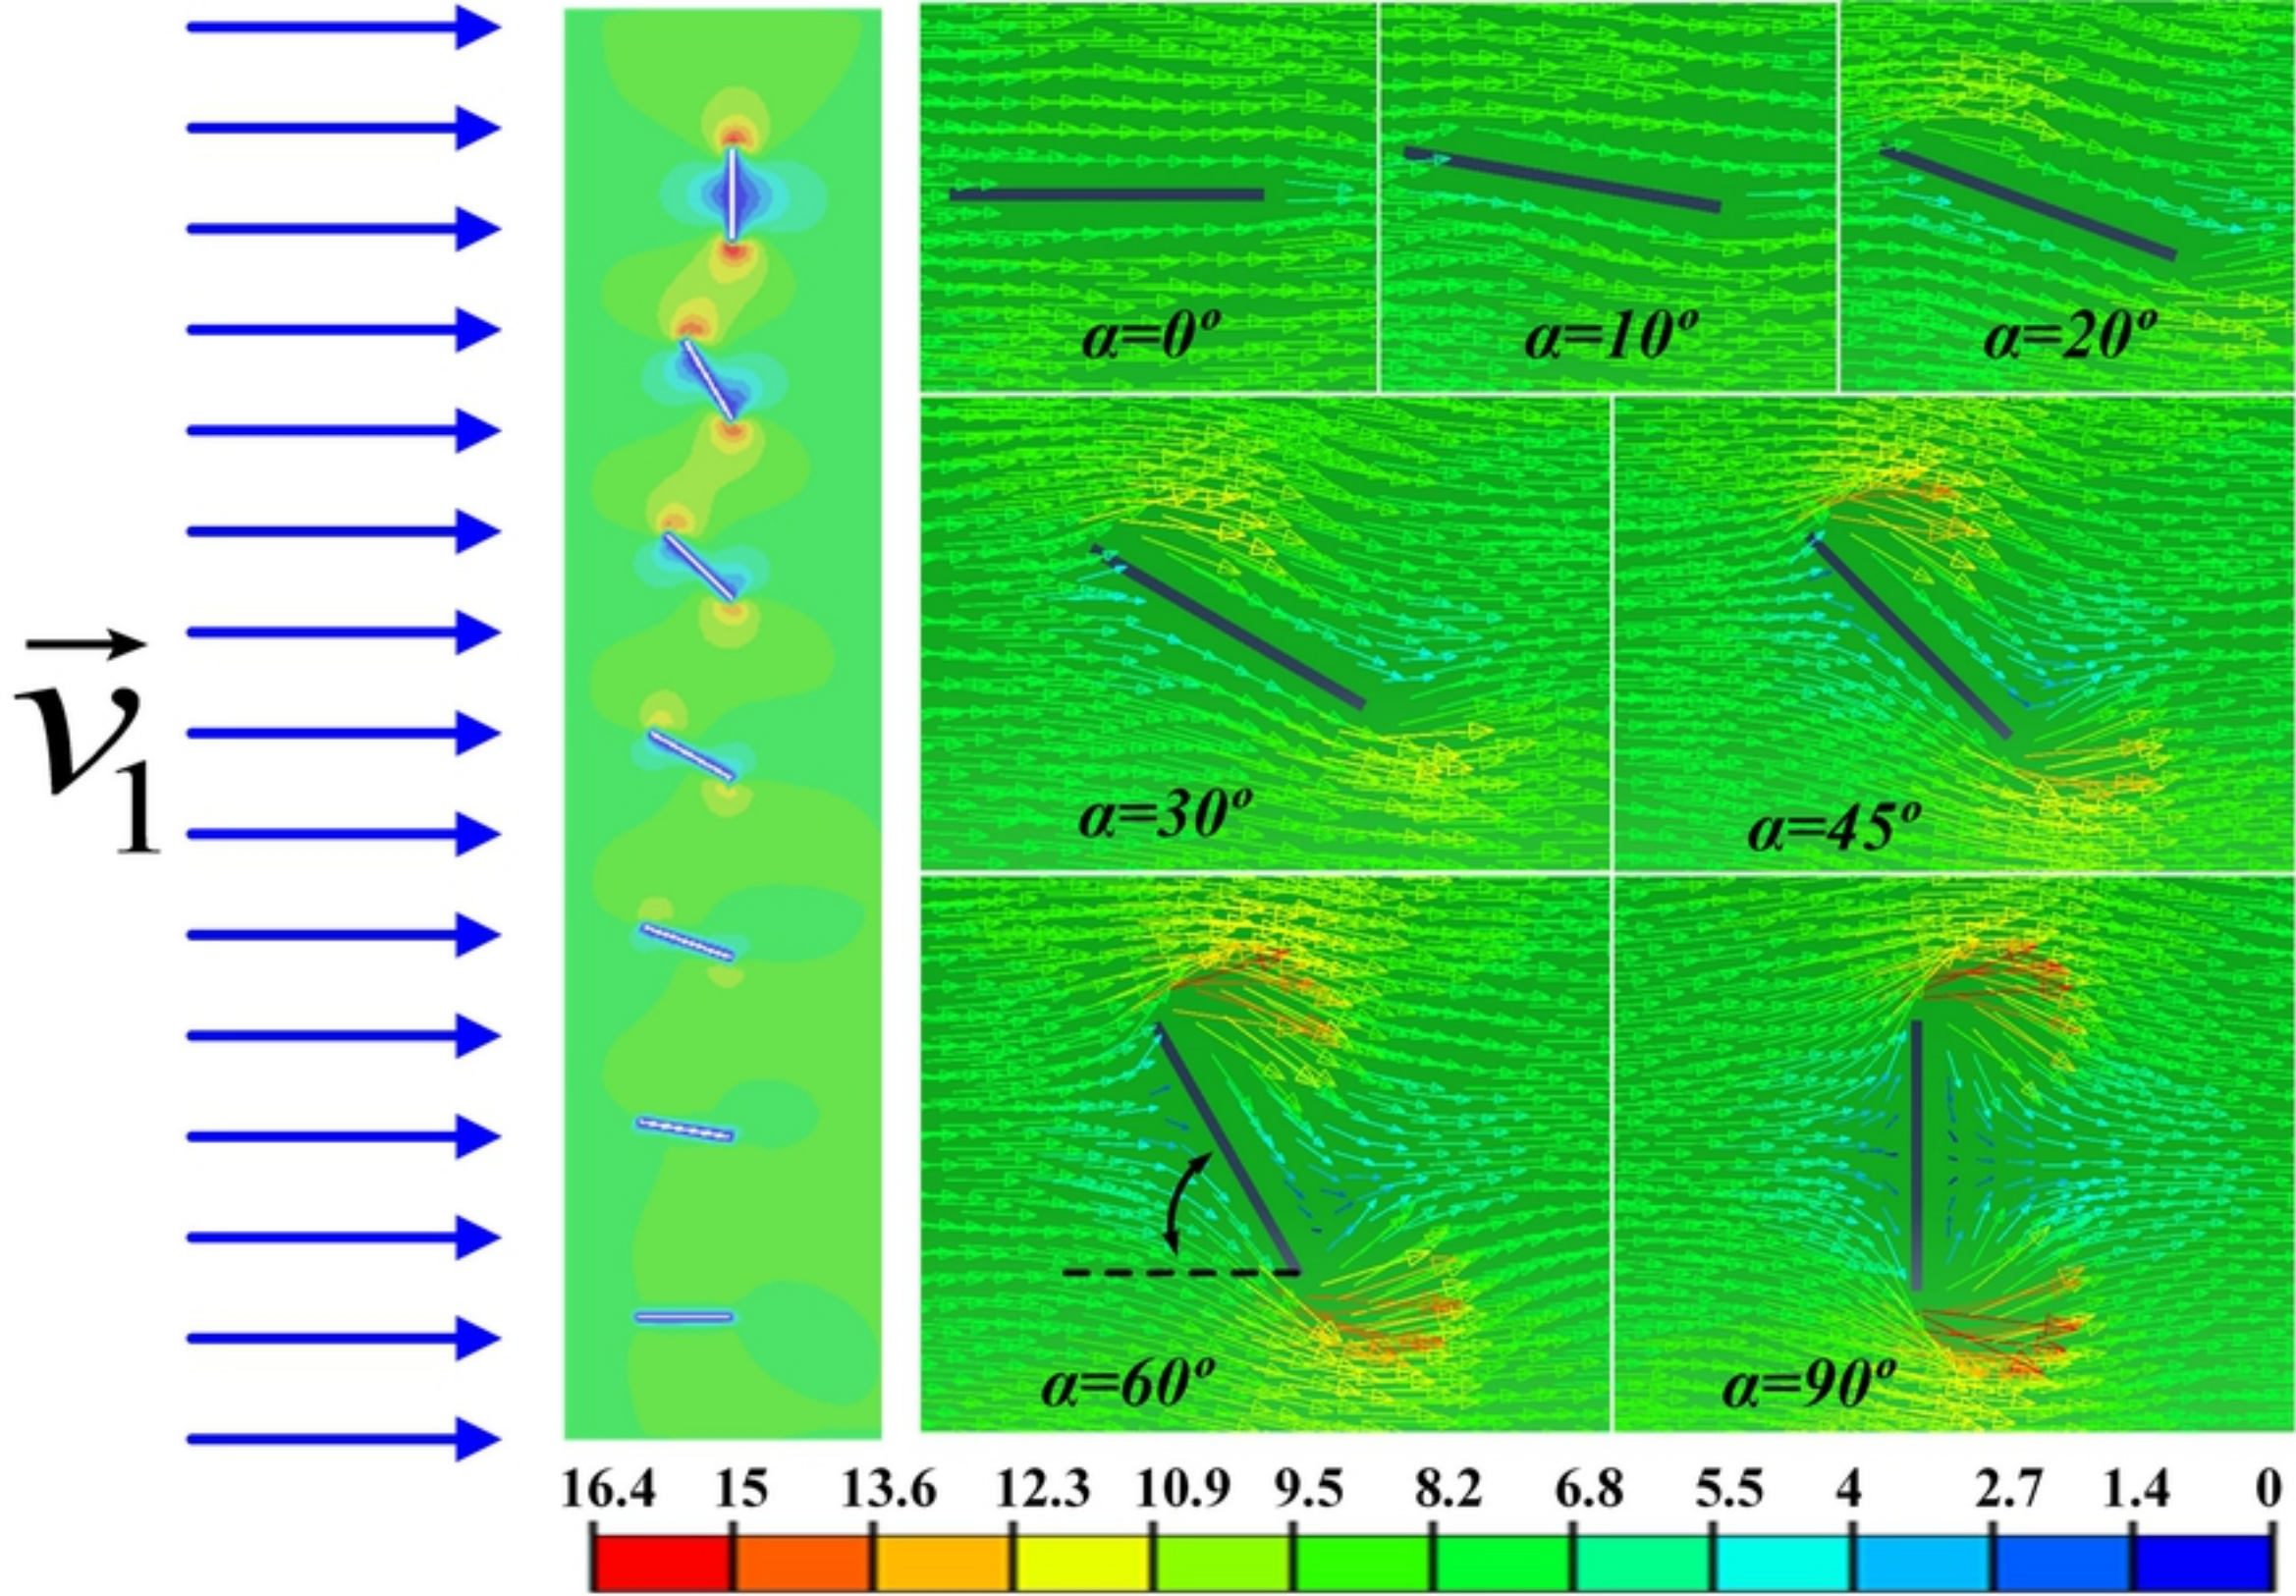

Source: https://www.biorxiv.org/content/10.1101/393686v1.full.pdf
